# Supplementary material for: Quantitative Proteomic Analysis Reveals Antiviral and Anti-inflammatory Effects of Puerarin in Piglets Infected With Porcine Epidemic Diarrhea Virus
Source: Front Immunol. 2020 Feb 26;11:169. doi: 10.3389/fimmu.2020.00169 (PMC7055472; doi:10.3389/fimmu.2020.00169)
Supplement: Supplementary file 2 [file Table_2.XLS]

## Sheet: DEPs from PEDV VS Control 
Analysis Type:	PANTHER Overrepresentation Test (Released 20181113)
Annotation Version and Release Date:	GO Ontology database Released 2019-01-01
Analyzed List:	Client Text Box Input (Sus scrofa)
Reference List:	Sus scrofa (all genes in database)
Test Type:	FISHER
Correction:	FDR
GO cellular component complete	Sus scrofa - REFLIST (23230)	Client Text Box Input (196)	Client Text Box Input (expected)	Client Text Box Input (over/under)	Client Text Box Input (fold Enrichment)	Client Text Box Input (raw P-value)	Client Text Box Input (FDR)
cytoplasm (GO:0005737)	6881	113	58.06	+	1.95	5.87e-16	1e-12
cytoplasmic part (GO:0044444)	5692	94	48.03	+	1.96	1.49e-12	1.28e-09
brush border (GO:0005903)	64	11	0.54	+	20.37	3.26e-11	1.86e-08
cluster of actin-based cell projections (GO:0098862)	98	12	0.83	+	14.51	1.44e-10	6.18e-08
intracellular part (GO:0044424)	9713	126	81.95	+	1.54	3.47e-10	9.92e-08
intracellular (GO:0005622)	9713	126	81.95	+	1.54	3.47e-10	1.19e-07
organelle (GO:0043226)	8614	112	72.68	+	1.54	1.71e-08	4.19e-06
intracellular organelle (GO:0043229)	8380	109	70.71	+	1.54	3.47e-08	7.44e-06
actin cytoskeleton (GO:0015629)	329	15	2.78	+	5.4	2.28e-07	4.34e-05
microvillus (GO:0005902)	51	7	0.43	+	16.27	5.4e-07	9.26e-05
cell (GO:0005623)	12664	141	106.85	+	1.32	7.67e-07	0.000119
cell part (GO:0044464)	12500	139	105.47	+	1.32	1.2e-06	0.000171
integral component of membrane (GO:0016021)	6422	26	54.18	-	0.48	2.49e-06	0.000328
non-membrane-bounded organelle (GO:0043228)	3070	50	25.9	+	1.93	4.01e-06	0.000429
lipid droplet (GO:0005811)	44	6	0.37	+	16.16	3.72e-06	0.000455
intracellular non-membrane-bounded organelle (GO:0043232)	3069	50	25.89	+	1.93	3.98e-06	0.000455
intrinsic component of membrane (GO:0031224)	6481	28	54.68	-	0.51	8.91e-06	0.000898
very-low-density lipoprotein particle (GO:0034361)	13	4	0.11	+	36.47	1.04e-05	0.000936
triglyceride-rich plasma lipoprotein particle (GO:0034385)	13	4	0.11	+	36.47	1.04e-05	0.000988
myosin complex (GO:0016459)	56	6	0.47	+	12.7	1.32e-05	0.00113
actin-based cell projection (GO:0098858)	124	8	1.05	+	7.65	1.58e-05	0.00129
filamentous actin (GO:0031941)	15	4	0.13	+	31.61	1.67e-05	0.0013
endoplasmic reticulum (GO:0005783)	866	21	7.31	+	2.87	1.86e-05	0.00133
membrane-bounded organelle (GO:0043227)	7235	90	61.04	+	1.47	1.8e-05	0.00134
inflammasome complex (GO:0061702)	6	3	0.05	+	59.26	4.67e-05	0.0032
endoplasmic reticulum part (GO:0044432)	464	14	3.91	+	3.58	5.38e-05	0.00355
plasma lipoprotein particle (GO:0034358)	22	4	0.19	+	21.55	6.15e-05	0.00376
lipoprotein particle (GO:1990777)	22	4	0.19	+	21.55	6.15e-05	0.0039
intracellular organelle part (GO:0044446)	5349	70	45.13	+	1.55	7.91e-05	0.00467
protein-lipid complex (GO:0032994)	24	4	0.2	+	19.75	8.31e-05	0.00475
mitochondrion (GO:0005739)	977	21	8.24	+	2.55	0.000101	0.00558
cytosol (GO:0005829)	2188	36	18.46	+	1.95	0.000114	0.00611
organelle part (GO:0044422)	5562	71	46.93	+	1.51	0.000141	0.00733
actin filament (GO:0005884)	57	5	0.48	+	10.4	0.000171	0.00863
extracellular space (GO:0005615)	601	15	5.07	+	2.96	0.000225	0.0107
endomembrane system (GO:0012505)	2256	36	19.03	+	1.89	0.000232	0.0107
ruffle (GO:0001726)	96	6	0.81	+	7.41	0.00022	0.0108
high-density lipoprotein particle (GO:0034364)	12	3	0.1	+	29.63	0.000244	0.011
cellular_component (GO:0005575)	15929	157	134.4	+	1.17	0.000361	0.0154
Unclassified (UNCLASSIFIED)	7301	39	61.6	-	0.63	0.000361	0.0158
AIM2 inflammasome complex (GO:0097169)	2	2	0.02	+	> 100	0.000413	0.0161
TAP complex (GO:0042825)	2	2	0.02	+	> 100	0.000413	0.0165
IPAF inflammasome complex (GO:0072557)	2	2	0.02	+	> 100	0.000413	0.0169
NLRP1 inflammasome complex (GO:0072558)	2	2	0.02	+	> 100	0.000413	0.0173
cytosolic part (GO:0044445)	111	6	0.94	+	6.41	0.00046	0.0175
intracellular membrane-bounded organelle (GO:0043231)	6743	80	56.89	+	1.41	0.00048	0.0179
endoplasmic reticulum membrane (GO:0005789)	395	11	3.33	+	3.3	0.000655	0.0239
actin filament bundle (GO:0032432)	44	4	0.37	+	10.77	0.000693	0.0247
nuclear outer membrane-endoplasmic reticulum membrane network (GO:0042175)	407	11	3.43	+	3.2	0.000831	0.0291
polysomal ribosome (GO:0042788)	21	3	0.18	+	16.93	0.00103	0.0338
MHC class I peptide loading complex (GO:0042824)	4	2	0.03	+	59.26	0.00102	0.0343
NLRP3 inflammasome complex (GO:0072559)	4	2	0.03	+	59.26	0.00102	0.035
perinuclear region of cytoplasm (GO:0048471)	363	10	3.06	+	3.27	0.00124	0.0401
organelle membrane (GO:0031090)	1166	21	9.84	+	2.13	0.00142	0.045
Analysis Type:	PANTHER Overrepresentation Test (Released 20181113)
Annotation Version and Release Date:	GO Ontology database Released 2019-01-01
Analyzed List:	Client Text Box Input (Sus scrofa)
Reference List:	Sus scrofa (all genes in database)
Test Type:	FISHER
Correction:	FDR
GO molecular function complete	Sus scrofa - REFLIST (23230)	Client Text Box Input (196)	Client Text Box Input (expected)	Client Text Box Input (over/under)	Client Text Box Input (fold Enrichment)	Client Text Box Input (raw P-value)	Client Text Box Input (FDR)
ion binding (GO:0043167)	4613	85	38.92	+	2.18	1.09e-13	4.01e-10
catalytic activity (GO:0003824)	4618	84	38.96	+	2.16	4.77e-13	8.75e-10
anion binding (GO:0043168)	2329	53	19.65	+	2.7	1.8e-11	2.2e-08
small molecule binding (GO:0036094)	2178	49	18.38	+	2.67	1.95e-10	1.78e-07
actin filament binding (GO:0051015)	127	11	1.07	+	10.27	2.42e-08	1.27e-05
molecular transducer activity (GO:0060089)	2435	1	20.54	-	0.05	2.16e-08	1.32e-05
signaling receptor activity (GO:0038023)	2409	1	20.33	-	0.05	2.07e-08	1.52e-05
transmembrane signaling receptor activity (GO:0004888)	2264	1	19.1	-	0.05	7.5e-08	3.43e-05
G protein-coupled receptor activity (GO:0004930)	1903	0	16.06	-	< 0.01	1.04e-07	3.82e-05
hydrolase activity (GO:0016787)	1980	41	16.71	+	2.45	1.01e-07	4.12e-05
aminopeptidase activity (GO:0004177)	28	6	0.24	+	25.4	3.52e-07	0.000117
binding (GO:0005488)	9924	118	83.73	+	1.41	1.37e-06	0.000418
carbohydrate derivative binding (GO:0097367)	1918	37	16.18	+	2.29	2.79e-06	0.000787
actin binding (GO:0003779)	309	13	2.61	+	4.99	3.48e-06	0.000912
carboxylic acid binding (GO:0031406)	110	8	0.93	+	8.62	6.94e-06	0.00134
nucleoside phosphate binding (GO:1901265)	1921	36	16.21	+	2.22	6.34e-06	0.00137
exopeptidase activity (GO:0008238)	79	7	0.67	+	10.5	7.93e-06	0.00138
metal ion binding (GO:0046872)	2722	46	22.97	+	2	5.71e-06	0.0014
cation binding (GO:0043169)	2766	46	23.34	+	1.97	6.9e-06	0.00141
organic acid binding (GO:0043177)	112	8	0.94	+	8.47	7.86e-06	0.00144
nucleotide binding (GO:0000166)	1921	36	16.21	+	2.22	6.34e-06	0.00145
metalloaminopeptidase activity (GO:0070006)	13	4	0.11	+	36.47	1.04e-05	0.00173
molecular_function (GO:0003674)	14982	155	126.41	+	1.23	1.18e-05	0.00173
olfactory receptor activity (GO:0004984)	1400	0	11.81	-	< 0.01	1.12e-05	0.00179
Unclassified (UNCLASSIFIED)	8248	41	69.59	-	0.59	1.18e-05	0.00181
metallopeptidase activity (GO:0008237)	161	9	1.36	+	6.63	1.38e-05	0.00195
cytoskeletal protein binding (GO:0008092)	665	18	5.61	+	3.21	1.88e-05	0.00256
monocarboxylic acid binding (GO:0033293)	35	5	0.3	+	16.93	2.02e-05	0.00264
identical protein binding (GO:0042802)	1240	26	10.46	+	2.49	2.16e-05	0.00273
protein homodimerization activity (GO:0042803)	582	16	4.91	+	3.26	4.65e-05	0.00568
purine ribonucleotide binding (GO:0032555)	1707	31	14.4	+	2.15	5.47e-05	0.00646
peptidase activity, acting on L-amino acid peptides (GO:0070011)	534	15	4.51	+	3.33	6.38e-05	0.00731
3-hydroxyacyl-CoA dehydrogenase activity (GO:0003857)	7	3	0.06	+	50.79	6.63e-05	0.00736
nucleoside-triphosphatase activity (GO:0017111)	618	16	5.21	+	3.07	9.22e-05	0.00938
ribonucleotide binding (GO:0032553)	1720	31	14.51	+	2.14	9.07e-05	0.00949
purine nucleotide binding (GO:0017076)	1714	31	14.46	+	2.14	8.87e-05	0.00956
peptidase activity (GO:0008233)	555	15	4.68	+	3.2	9.69e-05	0.00959
purine ribonucleoside triphosphate binding (GO:0035639)	1667	30	14.07	+	2.13	0.00013	0.0125
pyrophosphatase activity (GO:0016462)	652	16	5.5	+	2.91	0.000168	0.0157
oxidoreductase activity, acting on the CH-OH group of donors, NAD or NADP as acceptor (GO:0016616)	93	6	0.78	+	7.65	0.000187	0.0163
hydrolase activity, acting on acid anhydrides, in phosphorus-containing anhydrides (GO:0016818)	656	16	5.53	+	2.89	0.000179	0.0164
hydrolase activity, acting on acid anhydrides (GO:0016817)	658	16	5.55	+	2.88	0.000185	0.0166
oxidoreductase activity, acting on CH-OH group of donors (GO:0016614)	101	6	0.85	+	7.04	0.000285	0.0243
magnesium ion binding (GO:0000287)	192	8	1.62	+	4.94	0.000292	0.0243
protein-containing complex binding (GO:0044877)	622	15	5.25	+	2.86	0.000321	0.0262
coenzyme binding (GO:0050662)	252	9	2.13	+	4.23	0.000369	0.0294
motor activity (GO:0003774)	109	6	0.92	+	6.52	0.00042	0.0308
L-gulonate 3-dehydrogenase activity (GO:0050104)	2	2	0.02	+	> 100	0.000413	0.0309
ribonuclease T2 activity (GO:0033897)	2	2	0.02	+	> 100	0.000413	0.0315
TAP binding (GO:0046977)	2	2	0.02	+	> 100	0.000413	0.0322
fatty acid binding (GO:0005504)	16	3	0.13	+	22.22	0.000506	0.0357
metalloexopeptidase activity (GO:0008235)	40	4	0.34	+	11.85	0.000497	0.0357
ribonucleoside binding (GO:0032549)	336	10	2.83	+	3.53	0.000703	0.0429
cofactor binding (GO:0048037)	463	12	3.91	+	3.07	0.000695	0.0432
peptide-transporting ATPase activity (GO:0015440)	3	2	0.03	+	79.01	0.000685	0.0433
phosphatidylcholine-sterol O-acyltransferase activator activity (GO:0060228)	3	2	0.03	+	79.01	0.000685	0.044
GTP binding (GO:0005525)	332	10	2.8	+	3.57	0.000643	0.0444
purine ribonucleoside binding (GO:0032550)	333	10	2.81	+	3.56	0.000658	0.0446
amide-transporting ATPase activity (GO:0033220)	3	2	0.03	+	79.01	0.000685	0.0448
purine nucleoside binding (GO:0001883)	334	10	2.82	+	3.55	0.000672	0.0448
ligase activity (GO:0016874)	124	6	1.05	+	5.73	0.000803	0.046
nucleoside binding (GO:0001882)	341	10	2.88	+	3.48	0.000784	0.0463
guanyl nucleotide binding (GO:0019001)	342	10	2.89	+	3.47	0.000801	0.0466
guanyl ribonucleotide binding (GO:0032561)	341	10	2.88	+	3.48	0.000784	0.0471
Analysis Type:	PANTHER Overrepresentation Test (Released 20181113)
Annotation Version and Release Date:	GO Ontology database Released 2019-01-01
Analyzed List:	Client Text Box Input (Sus scrofa)
Reference List:	Sus scrofa (all genes in database)
Test Type:	FISHER
Correction:	FDR
GO biological process complete	Sus scrofa - REFLIST (23230)	Client Text Box Input (196)	Client Text Box Input (expected)	Client Text Box Input (over/under)	Client Text Box Input (fold Enrichment)	Client Text Box Input (raw P-value)	Client Text Box Input (FDR)
metabolic process (GO:0008152)	6593	102	55.63	+	1.83	4.9e-12	6.85e-08
small molecule metabolic process (GO:0044281)	1127	35	9.51	+	3.68	3.86e-11	2.7e-07
organic substance metabolic process (GO:0071704)	5964	91	50.32	+	1.81	6.07e-10	2.82e-06
plasma lipoprotein particle organization (GO:0071827)	25	7	0.21	+	33.19	7.27e-09	2.54e-05
antigen processing and presentation of endogenous peptide antigen via MHC class I (GO:0019885)	6	5	0.05	+	98.77	1.73e-08	2.68e-05
protein-lipid complex subunit organization (GO:0071825)	28	7	0.24	+	29.63	1.42e-08	2.84e-05
carboxylic acid metabolic process (GO:0019752)	542	21	4.57	+	4.59	1.22e-08	2.84e-05
antigen processing and presentation of endogenous peptide antigen (GO:0002483)	6	5	0.05	+	98.77	1.73e-08	3.02e-05
antigen processing and presentation of peptide antigen via MHC class I (GO:0002474)	14	6	0.12	+	50.79	1.12e-08	3.12e-05
response to virus (GO:0009615)	195	13	1.65	+	7.9	2.37e-08	3.32e-05
oxoacid metabolic process (GO:0043436)	571	21	4.82	+	4.36	2.89e-08	3.67e-05
antigen processing and presentation of endogenous antigen (GO:0019883)	8	5	0.07	+	74.08	4.75e-08	4.74e-05
regulation of plasma lipoprotein particle levels (GO:0097006)	34	7	0.29	+	24.4	4.56e-08	4.9e-05
organic acid metabolic process (GO:0006082)	587	21	4.95	+	4.24	4.55e-08	5.3e-05
response to other organism (GO:0051707)	544	20	4.59	+	4.36	6.34e-08	5.54e-05
response to external biotic stimulus (GO:0043207)	547	20	4.62	+	4.33	6.91e-08	5.68e-05
organonitrogen compound biosynthetic process (GO:1901566)	1226	31	10.34	+	3	6.24e-08	5.81e-05
antigen processing and presentation of peptide antigen (GO:0048002)	21	6	0.18	+	33.86	8.12e-08	6.31e-05
primary metabolic process (GO:0044238)	5675	82	47.88	+	1.71	1.03e-07	7.54e-05
response to biotic stimulus (GO:0009607)	568	20	4.79	+	4.17	1.24e-07	8.68e-05
organonitrogen compound metabolic process (GO:1901564)	4063	65	34.28	+	1.9	1.34e-07	8.9e-05
response to external stimulus (GO:0009605)	1166	29	9.84	+	2.95	2.46e-07	0.000156
defense response to virus (GO:0051607)	128	10	1.08	+	9.26	2.61e-07	0.000159
sensory perception of chemical stimulus (GO:0007606)	1725	0	14.55	-	< 0.01	5.9e-07	0.000284
organic substance biosynthetic process (GO:1901576)	1955	39	16.5	+	2.36	4.89e-07	0.000285
detection of stimulus involved in sensory perception (GO:0050906)	1721	0	14.52	-	< 0.01	5.84e-07	0.000292
protein-lipid complex assembly (GO:0065005)	15	5	0.13	+	39.51	5.45e-07	0.000293
detection of chemical stimulus (GO:0009593)	1704	0	14.38	-	< 0.01	5.73e-07	0.000297
protein-containing complex subunit organization (GO:0043933)	938	25	7.91	+	3.16	5.34e-07	0.000298
antigen processing and presentation (GO:0019882)	53	7	0.45	+	15.65	6.84e-07	0.000319
sensory perception of smell (GO:0007608)	1690	0	14.26	-	< 0.01	9.4e-07	0.000398
detection of chemical stimulus involved in sensory perception of smell (GO:0050911)	1669	0	14.08	-	< 0.01	8.85e-07	0.000399
detection of chemical stimulus involved in sensory perception (GO:0050907)	1684	0	14.21	-	< 0.01	9.19e-07	0.000401
lipid transport (GO:0006869)	188	11	1.59	+	6.93	9.92e-07	0.000408
biosynthetic process (GO:0009058)	2020	39	17.04	+	2.29	1.31e-06	0.000523
innate immune response (GO:0045087)	238	12	2.01	+	5.98	1.41e-06	0.000547
response to type I interferon (GO:0034340)	20	5	0.17	+	29.63	1.81e-06	0.000682
lipid metabolic process (GO:0006629)	690	20	5.82	+	3.44	2.35e-06	0.000864
organic substance transport (GO:0071702)	1092	26	9.21	+	2.82	2.41e-06	0.000864
lipid localization (GO:0010876)	213	11	1.8	+	6.12	3.14e-06	0.0011
regulation of immune effector process (GO:0002697)	261	12	2.2	+	5.45	3.51e-06	0.0012
actin filament severing (GO:0051014)	10	4	0.08	+	47.41	4.46e-06	0.00148
detection of stimulus (GO:0051606)	1786	1	15.07	-	0.07	4.81e-06	0.00153
anion transport (GO:0006820)	370	14	3.12	+	4.48	4.75e-06	0.00154
plasma lipoprotein particle assembly (GO:0034377)	11	4	0.09	+	43.1	6.04e-06	0.00183
small molecule biosynthetic process (GO:0044283)	325	13	2.74	+	4.74	5.89e-06	0.00183
defense response (GO:0006952)	616	18	5.2	+	3.46	6.93e-06	0.00197
biological_process (GO:0008150)	16288	165	137.43	+	1.2	6.76e-06	0.00197
Unclassified (UNCLASSIFIED)	6942	31	58.57	-	0.53	6.76e-06	0.00201
response to stress (GO:0006950)	1878	35	15.85	+	2.21	9.79e-06	0.00274
cellular metabolic process (GO:0044237)	5557	75	46.89	+	1.6	1.03e-05	0.00281
regulation of phospholipid efflux (GO:1902994)	3	3	0.03	+	> 100	1.13e-05	0.00298
cellular biosynthetic process (GO:0044249)	1896	35	16	+	2.19	1.16e-05	0.00301
positive regulation of phospholipid efflux (GO:1902995)	3	3	0.03	+	> 100	1.13e-05	0.00304
immune effector process (GO:0002252)	297	12	2.51	+	4.79	1.23e-05	0.00313
cellular amide metabolic process (GO:0043603)	789	20	6.66	+	3	1.61e-05	0.00401
cellular response to type I interferon (GO:0071357)	15	4	0.13	+	31.61	1.67e-05	0.00409
regulation of sterol transport (GO:0032371)	34	5	0.29	+	17.43	1.78e-05	0.00421
regulation of cholesterol transport (GO:0032374)	34	5	0.29	+	17.43	1.78e-05	0.00429
chylomicron remnant clearance (GO:0034382)	4	3	0.03	+	88.89	1.97e-05	0.00451
protein-containing complex remodeling (GO:0034367)	16	4	0.13	+	29.63	2.07e-05	0.00452
triglyceride-rich lipoprotein particle clearance (GO:0071830)	4	3	0.03	+	88.89	1.97e-05	0.00459
protein-lipid complex remodeling (GO:0034368)	16	4	0.13	+	29.63	2.07e-05	0.0046
plasma lipoprotein particle remodeling (GO:0034369)	16	4	0.13	+	29.63	2.07e-05	0.00467
drug metabolic process (GO:0017144)	373	13	3.15	+	4.13	2.41e-05	0.00517
protein-containing complex assembly (GO:0065003)	816	20	6.88	+	2.9	2.56e-05	0.00543
defense response to other organism (GO:0098542)	272	11	2.29	+	4.79	2.83e-05	0.0059
regulation of type I interferon production (GO:0032479)	65	6	0.55	+	10.94	2.9e-05	0.00595
cholesterol efflux (GO:0033344)	18	4	0.15	+	26.34	3.09e-05	0.00625
regulation of actin nucleation (GO:0051125)	19	4	0.16	+	24.95	3.72e-05	0.00741
urea metabolic process (GO:0019627)	6	3	0.05	+	59.26	4.67e-05	0.00815
immune system process (GO:0002376)	1254	26	10.58	+	2.46	4.18e-05	0.00822
urea cycle (GO:0000050)	6	3	0.05	+	59.26	4.67e-05	0.00826
regulation of Cdc42 protein signal transduction (GO:0032489)	6	3	0.05	+	59.26	4.67e-05	0.00836
cellular lipid metabolic process (GO:0044255)	517	15	4.36	+	3.44	4.48e-05	0.00846
regulation of phospholipid transport (GO:2001138)	6	3	0.05	+	59.26	4.67e-05	0.00847
regulation of leukocyte mediated immunity (GO:0002703)	144	8	1.21	+	6.58	4.36e-05	0.00847
positive regulation of defense response to virus by host (GO:0002230)	20	4	0.17	+	23.7	4.43e-05	0.00848
response to cytokine (GO:0034097)	518	15	4.37	+	3.43	4.58e-05	0.00852
positive regulation of phospholipid transport (GO:2001140)	6	3	0.05	+	59.26	4.67e-05	0.00858
nitrogen compound metabolic process (GO:0006807)	5221	69	44.05	+	1.57	5.01e-05	0.00863
positive regulation of interferon-alpha production (GO:0032727)	22	4	0.19	+	21.55	6.15e-05	0.00999
sensory perception of sound (GO:0007605)	110	7	0.93	+	7.54	5.88e-05	0.01
lipoprotein metabolic process (GO:0042157)	75	6	0.63	+	9.48	6.12e-05	0.0101
positive regulation of type I interferon production (GO:0032481)	45	5	0.38	+	13.17	6.08e-05	0.0102
amide biosynthetic process (GO:0043604)	662	17	5.59	+	3.04	6.11e-05	0.0102
nitrogen cycle metabolic process (GO:0071941)	7	3	0.06	+	50.79	6.63e-05	0.0106
regulation of production of molecular mediator of immune response (GO:0002700)	114	7	0.96	+	7.28	7.28e-05	0.0116
regulation of multi-organism process (GO:0043900)	306	11	2.58	+	4.26	7.87e-05	0.0124
negative regulation of catalytic activity (GO:0043086)	546	15	4.61	+	3.26	8.12e-05	0.0126
macromolecule localization (GO:0033036)	1343	26	11.33	+	2.29	8.68e-05	0.0133
phospholipid efflux (GO:0033700)	8	3	0.07	+	44.45	9.06e-05	0.0138
monocarboxylic acid metabolic process (GO:0032787)	258	10	2.18	+	4.59	9.2e-05	0.0138
actin filament capping (GO:0051693)	25	4	0.21	+	18.96	9.58e-05	0.0139
regulation of interferon-alpha production (GO:0032647)	25	4	0.21	+	18.96	9.58e-05	0.0141
multi-organism process (GO:0051704)	1265	25	10.67	+	2.34	9.48e-05	0.0141
sensory perception of mechanical stimulus (GO:0050954)	121	7	1.02	+	6.86	0.000104	0.0148
organophosphate ester transport (GO:0015748)	83	6	0.7	+	8.57	0.000104	0.0149
regulation of defense response to virus by host (GO:0050691)	26	4	0.22	+	18.23	0.00011	0.0155
immune response (GO:0006955)	562	15	4.74	+	3.16	0.000111	0.0155
regulation of defense response to virus (GO:0050688)	52	5	0.44	+	11.4	0.000115	0.0157
regulation of immune system process (GO:0002682)	912	20	7.69	+	2.6	0.000115	0.0158
regulation of immune response (GO:0050776)	502	14	4.24	+	3.31	0.000121	0.0162
cellular nitrogen compound biosynthetic process (GO:0044271)	1290	25	10.88	+	2.3	0.00012	0.0163
actin filament-based movement (GO:0030048)	53	5	0.45	+	11.18	0.000125	0.0166
lipid catabolic process (GO:0016042)	170	8	1.43	+	5.58	0.000132	0.0172
regulation of adaptive immune response (GO:0002819)	126	7	1.06	+	6.58	0.000132	0.0174
localization (GO:0051179)	3574	51	30.16	+	1.69	0.000139	0.018
extracellular structure organization (GO:0043062)	172	8	1.45	+	5.51	0.000143	0.0183
proteolysis (GO:0006508)	856	19	7.22	+	2.63	0.000147	0.0187
high-density lipoprotein particle remodeling (GO:0034375)	10	3	0.08	+	35.56	0.000155	0.0193
interleukin-1 production (GO:0032612)	10	3	0.08	+	35.56	0.000155	0.0195
negative regulation of actin filament depolymerization (GO:0030835)	29	4	0.24	+	16.35	0.000161	0.0199
regulation of viral process (GO:0050792)	131	7	1.11	+	6.33	0.000166	0.0203
positive regulation of leukocyte mediated immunity (GO:0002705)	92	6	0.78	+	7.73	0.000177	0.0215
G protein-coupled receptor signaling pathway (GO:0007186)	2064	4	17.41	-	0.23	0.00019	0.0229
phospholipid transport (GO:0015914)	59	5	0.5	+	10.04	0.000199	0.0238
negative regulation of viral genome replication (GO:0045071)	32	4	0.27	+	14.82	0.000227	0.0269
negative regulation of viral process (GO:0048525)	62	5	0.52	+	9.56	0.000247	0.0288
regulation of viral genome replication (GO:0045069)	62	5	0.52	+	9.56	0.000247	0.029
transport (GO:0006810)	2630	40	22.19	+	1.8	0.000252	0.0291
positive regulation of actin filament polymerization (GO:0030838)	63	5	0.53	+	9.41	0.000265	0.0303
negative regulation of actin filament polymerization (GO:0030837)	34	4	0.29	+	13.94	0.000281	0.0319
positive regulation of immune effector process (GO:0002699)	146	7	1.23	+	5.68	0.000312	0.0349
triglyceride metabolic process (GO:0006641)	35	4	0.3	+	13.55	0.000311	0.035
regulation of innate immune response (GO:0045088)	195	8	1.65	+	4.86	0.000323	0.0358
regulation of actin filament polymerization (GO:0030833)	105	6	0.89	+	6.77	0.000347	0.0379
regulation of cytokine production involved in immune response (GO:0002718)	67	5	0.57	+	8.84	0.000346	0.0381
plasma lipoprotein particle clearance (GO:0034381)	14	3	0.12	+	25.4	0.00036	0.0387
positive regulation of cholesterol efflux (GO:0010875)	14	3	0.12	+	25.4	0.00036	0.039
fatty acid metabolic process (GO:0006631)	152	7	1.28	+	5.46	0.000394	0.042
regulation of biological quality (GO:0065008)	2612	39	22.04	+	1.77	0.0004	0.0423
intermediate-density lipoprotein particle clearance (GO:0071831)	2	2	0.02	+	> 100	0.000413	0.0431
cytoplasmic actin-based contraction involved in cell motility (GO:0060327)	2	2	0.02	+	> 100	0.000413	0.0434
regulation of protein stability (GO:0031647)	204	8	1.72	+	4.65	0.000431	0.0446
regulation of lymphocyte mediated immunity (GO:0002706)	110	6	0.93	+	6.46	0.00044	0.0452
regulation of symbiosis, encompassing mutualism through parasitism (GO:0043903)	156	7	1.32	+	5.32	0.000458	0.0467
positive regulation of cytokine production involved in immune response (GO:0002720)	40	4	0.34	+	11.85	0.000497	0.0488
regulation of transport (GO:0051049)	1175	22	9.91	+	2.22	0.00049	0.0489
regulation of lipid transport (GO:0032368)	73	5	0.62	+	8.12	0.000501	0.049
response to nutrient levels (GO:0031667)	208	8	1.75	+	4.56	0.000488	0.049
negative regulation of proteolysis (GO:0045861)	262	9	2.21	+	4.07	0.000484	0.049
regulation of actin filament depolymerization (GO:0030834)	40	4	0.34	+	11.85	0.000497	0.0492
oxidation-reduction process (GO:0055114)	871	18	7.35	+	2.45	0.000507	0.0492

## Sheet: DEPs from PEDV+PR VSPEDV
Analysis Type:	PANTHER Overrepresentation Test (Released 20181113)
Annotation Version and Release Date:	GO Ontology database Released 2019-01-01
Analyzed List:	Client Text Box Input (Sus scrofa)
Reference List:	Sus scrofa (all genes in database)
Test Type:	FISHER
Correction:	FDR
GO cellular component complete	Sus scrofa - REFLIST (23230)	Client Text Box Input (87)	Client Text Box Input (expected)	Client Text Box Input (over/under)	Client Text Box Input (fold Enrichment)	Client Text Box Input (raw P-value)	Client Text Box Input (FDR)
cytoplasm (GO:0005737)	6881	53	25.77	+	2.06	1.95e-09	3.35e-06
cytoplasmic part (GO:0044444)	5692	46	21.32	+	2.16	2.22e-08	1.91e-05
intracellular part (GO:0044424)	9713	61	36.38	+	1.68	1.48e-07	6.36e-05
intracellular (GO:0005622)	9713	61	36.38	+	1.68	1.48e-07	8.48e-05
cytosol (GO:0005829)	2188	25	8.19	+	3.05	2.99e-07	0.000103
cell (GO:0005623)	12664	66	47.43	+	1.39	5.26e-05	0.015
TAP complex (GO:0042825)	2	2	0.01	+	> 100	8.22e-05	0.0156
MHC protein complex (GO:0042611)	21	3	0.08	+	38.14	9.59e-05	0.0164
intracellular organelle (GO:0043229)	8380	50	31.38	+	1.59	7.05e-05	0.0173
integrin alphaL-beta2 complex (GO:0034687)	2	2	0.01	+	> 100	8.22e-05	0.0176
organelle (GO:0043226)	8614	50	32.26	+	1.55	0.000132	0.0206
cell part (GO:0044464)	12500	64	46.81	+	1.37	0.000212	0.028
MHC class I peptide loading complex (GO:0042824)	4	2	0.01	+	> 100	0.000204	0.0292
endoplasmic reticulum part (GO:0044432)	464	8	1.74	+	4.6	0.000384	0.0411
MHC class I protein complex (GO:0042612)	6	2	0.02	+	89	0.00038	0.0434
organelle part (GO:0044422)	5562	36	20.83	+	1.73	0.000355	0.0434
intracellular organelle part (GO:0044446)	5349	35	20.03	+	1.75	0.000471	0.0474
intracellular membrane-bounded organelle (GO:0043231)	6743	41	25.25	+	1.62	0.00051	0.0485
Analysis Type:	PANTHER Overrepresentation Test (Released 20181113)
Annotation Version and Release Date:	GO Ontology database Released 2019-01-01
Analyzed List:	Client Text Box Input (Sus scrofa)
Reference List:	Sus scrofa (all genes in database)
Test Type:	FISHER
Correction:	FDR
GO molecular function complete	Sus scrofa - REFLIST (23230)	Client Text Box Input (87)	Client Text Box Input (expected)	Client Text Box Input (over/under)	Client Text Box Input (fold Enrichment)	Client Text Box Input (raw P-value)	Client Text Box Input (FDR)
TAP binding (GO:0046977)	2	2	0.01	+	> 100	8.22e-05	0.0125
ICAM-3 receptor activity (GO:0030369)	2	2	0.01	+	> 100	8.22e-05	0.012
2'-5'-oligoadenylate synthetase activity (GO:0001730)	2	2	0.01	+	> 100	8.22e-05	0.0116
amide-transporting ATPase activity (GO:0033220)	3	2	0.01	+	> 100	0.000137	0.0173
peptide-transporting ATPase activity (GO:0015440)	3	2	0.01	+	> 100	0.000137	0.0167
double-stranded RNA binding (GO:0003725)	50	5	0.19	+	26.7	1.93e-06	0.000644
GTPase activity (GO:0003924)	227	6	0.85	+	7.06	0.00024	0.0267
guanyl nucleotide binding (GO:0019001)	342	9	1.28	+	7.03	6.55e-06	0.00171
GTP binding (GO:0005525)	332	8	1.24	+	6.43	4.04e-05	0.00988
purine ribonucleoside binding (GO:0032550)	333	8	1.25	+	6.41	4.13e-05	0.00945
purine nucleoside binding (GO:0001883)	334	8	1.25	+	6.4	4.21e-05	0.00908
ribonucleoside binding (GO:0032549)	336	8	1.26	+	6.36	4.39e-05	0.00894
guanyl ribonucleotide binding (GO:0032561)	341	8	1.28	+	6.26	4.86e-05	0.00937
nucleoside binding (GO:0001882)	341	8	1.28	+	6.26	4.86e-05	0.0089
purine nucleotide binding (GO:0017076)	1714	24	6.42	+	3.74	1.28e-08	1.18e-05
nucleotide binding (GO:0000166)	1921	26	7.19	+	3.61	5.3e-09	9.7e-06
nucleoside phosphate binding (GO:1901265)	1921	26	7.19	+	3.61	5.3e-09	6.47e-06
purine ribonucleotide binding (GO:0032555)	1707	23	6.39	+	3.6	5.63e-08	4.13e-05
ribonucleotide binding (GO:0032553)	1720	23	6.44	+	3.57	6.46e-08	3.94e-05
purine ribonucleoside triphosphate binding (GO:0035639)	1667	22	6.24	+	3.52	1.69e-07	7.72e-05
small molecule binding (GO:0036094)	2178	28	8.16	+	3.43	3.45e-09	1.26e-05
carbohydrate derivative binding (GO:0097367)	1918	24	7.18	+	3.34	1.06e-07	5.56e-05
identical protein binding (GO:0042802)	1240	15	4.64	+	3.23	5.78e-05	0.0101
anion binding (GO:0043168)	2329	26	8.72	+	2.98	2.51e-07	0.000102
adenyl ribonucleotide binding (GO:0032559)	1384	15	5.18	+	2.89	0.000193	0.0228
adenyl nucleotide binding (GO:0030554)	1390	15	5.21	+	2.88	0.000202	0.0231
drug binding (GO:0008144)	1497	16	5.61	+	2.85	0.000134	0.0176
hydrolase activity (GO:0016787)	1980	19	7.42	+	2.56	0.000118	0.0161
ion binding (GO:0043167)	4613	36	17.28	+	2.08	4.81e-06	0.00147
catalytic activity (GO:0003824)	4618	36	17.3	+	2.08	4.89e-06	0.00138
heterocyclic compound binding (GO:1901363)	4709	34	17.64	+	1.93	7.47e-05	0.0124
organic cyclic compound binding (GO:0097159)	4752	34	17.8	+	1.91	8.02e-05	0.0128
binding (GO:0005488)	9924	61	37.17	+	1.64	3.25e-07	0.000119
Analysis Type:	PANTHER Overrepresentation Test (Released 20181113)
Annotation Version and Release Date:	GO Ontology database Released 2019-01-01
Analyzed List:	Client Text Box Input (Sus scrofa)
Reference List:	Sus scrofa (all genes in database)
Test Type:	FISHER
Correction:	FDR
GO biological process complete	Sus scrofa - REFLIST (23230)	Client Text Box Input (87)	Client Text Box Input (expected)	Client Text Box Input (over/under)	Client Text Box Input (fold Enrichment)	Client Text Box Input (raw P-value)	Client Text Box Input (FDR)
antigen processing and presentation of exogenous protein antigen via MHC class Ib, TAP-dependent (GO:0002481)	2	2	0.01	+	> 100	8.22e-05	0.0185
antigen processing and presentation of exogenous peptide antigen via MHC class Ib (GO:0002477)	2	2	0.01	+	> 100	8.22e-05	0.0182
antigen processing and presentation of peptide antigen via MHC class Ib (GO:0002428)	2	2	0.01	+	> 100	8.22e-05	0.0179
positive regulation of toll-like receptor 7 signaling pathway (GO:0034157)	3	2	0.01	+	> 100	0.000137	0.0273
regulation of toll-like receptor 7 signaling pathway (GO:0034155)	3	2	0.01	+	> 100	0.000137	0.0269
antigen processing and presentation of endogenous peptide antigen (GO:0002483)	6	4	0.02	+	> 100	3.73e-08	3.48e-05
negative regulation of intracellular transport of viral material (GO:1901253)	3	2	0.01	+	> 100	0.000137	0.0265
RIG-I signaling pathway (GO:0039529)	3	2	0.01	+	> 100	0.000137	0.0261
antigen processing and presentation of endogenous peptide antigen via MHC class I (GO:0019885)	6	4	0.02	+	> 100	3.73e-08	3.26e-05
protein processing involved in protein targeting to mitochondrion (GO:0006627)	4	2	0.01	+	> 100	0.000204	0.0371
regulation of intracellular transport of viral material (GO:1901252)	4	2	0.01	+	> 100	0.000204	0.0366
cytoplasmic pattern recognition receptor signaling pathway in response to virus (GO:0039528)	4	2	0.01	+	> 100	0.000204	0.0361
antigen processing and presentation of endogenous antigen (GO:0019883)	8	4	0.03	+	> 100	8.75e-08	6.11e-05
antigen processing and presentation of exogenous peptide antigen (GO:0002478)	7	3	0.03	+	> 100	5.91e-06	0.00206
positive regulation of toll-like receptor 9 signaling pathway (GO:0034165)	5	2	0.02	+	> 100	0.000286	0.0453
interferon-gamma-mediated signaling pathway (GO:0060333)	5	2	0.02	+	> 100	0.000286	0.0448
antigen processing and presentation via MHC class Ib (GO:0002475)	5	2	0.02	+	> 100	0.000286	0.0443
foam cell differentiation (GO:0090077)	5	2	0.02	+	> 100	0.000286	0.0438
macrophage derived foam cell differentiation (GO:0010742)	5	2	0.02	+	> 100	0.000286	0.0434
antigen processing and presentation of peptide antigen via MHC class I (GO:0002474)	14	5	0.05	+	95.36	7.18e-09	8.36e-06
cellular response to type I interferon (GO:0071357)	15	5	0.06	+	89	9.55e-09	1.03e-05
antigen processing and presentation of exogenous antigen (GO:0019884)	10	3	0.04	+	80.1	1.4e-05	0.00398
response to type I interferon (GO:0034340)	20	6	0.07	+	80.1	4.91e-10	7.62e-07
type I interferon signaling pathway (GO:0060337)	11	3	0.04	+	72.82	1.77e-05	0.00486
antigen processing and presentation of peptide antigen (GO:0048002)	21	5	0.08	+	63.57	3.98e-08	3.27e-05
positive regulation of interferon-alpha production (GO:0032727)	22	4	0.08	+	48.55	2.54e-06	0.00101
positive regulation of T cell cytokine production (GO:0002726)	17	3	0.06	+	47.12	5.46e-05	0.0134
regulation of interferon-alpha production (GO:0032647)	25	4	0.09	+	42.72	4e-06	0.00147
negative regulation of viral genome replication (GO:0045071)	32	5	0.12	+	41.72	2.55e-07	0.000143
positive regulation of defense response to virus by host (GO:0002230)	20	3	0.07	+	40.05	8.42e-05	0.0181
positive regulation of myeloid leukocyte mediated immunity (GO:0002888)	20	3	0.07	+	40.05	8.42e-05	0.0178
positive regulation of T cell mediated immunity (GO:0002711)	30	4	0.11	+	35.6	7.7e-06	0.00244
positive regulation of cytokine production involved in immune response (GO:0002720)	40	5	0.15	+	33.38	6.99e-07	0.000349
regulation of defense response to virus by host (GO:0050691)	26	3	0.1	+	30.81	0.000171	0.0318
antigen processing and presentation (GO:0019882)	53	6	0.2	+	30.23	8.71e-08	6.4e-05
regulation of T cell cytokine production (GO:0002724)	27	3	0.1	+	29.67	0.000189	0.0348
positive regulation of type I interferon production (GO:0032481)	45	5	0.17	+	29.67	1.2e-06	0.000539
positive regulation of erythrocyte differentiation (GO:0045648)	29	3	0.11	+	27.62	0.00023	0.0397
CD4-positive, alpha-beta T cell differentiation (GO:0043367)	30	3	0.11	+	26.7	0.000252	0.0425
negative regulation of viral process (GO:0048525)	62	6	0.23	+	25.84	2.06e-07	0.00012
CD4-positive, alpha-beta T cell activation (GO:0035710)	31	3	0.12	+	25.84	0.000276	0.0449
negative regulation of viral life cycle (GO:1903901)	52	5	0.19	+	25.67	2.31e-06	0.000951
regulation of erythrocyte differentiation (GO:0045646)	45	4	0.17	+	23.73	3.37e-05	0.00872
defense response to virus (GO:0051607)	128	11	0.48	+	22.95	4.31e-12	2.01e-08
regulation of T cell mediated immunity (GO:0002709)	47	4	0.18	+	22.72	3.95e-05	0.00986
regulation of viral genome replication (GO:0045069)	62	5	0.23	+	21.53	5.18e-06	0.00186
regulation of type I interferon production (GO:0032479)	65	5	0.24	+	20.54	6.44e-06	0.00214
regulation of defense response to virus (GO:0050688)	52	4	0.19	+	20.54	5.73e-05	0.0136
positive regulation of leukocyte mediated immunity (GO:0002705)	92	7	0.34	+	20.32	8.88e-08	5.91e-05
regulation of cytokine production involved in immune response (GO:0002718)	67	5	0.25	+	19.93	7.4e-06	0.0024
response to virus (GO:0009615)	195	14	0.73	+	19.17	4.24e-14	5.92e-10
positive regulation of production of molecular mediator of immune response (GO:0002702)	76	5	0.28	+	17.57	1.32e-05	0.00384
integrin-mediated signaling pathway (GO:0007229)	61	4	0.23	+	17.51	0.000103	0.0211
positive regulation of immune effector process (GO:0002699)	146	8	0.55	+	14.63	1.13e-07	7.2e-05
positive regulation of lymphocyte mediated immunity (GO:0002708)	75	4	0.28	+	14.24	0.000219	0.0383
negative regulation of multi-organism process (GO:0043901)	133	7	0.5	+	14.05	9.47e-07	0.000441
positive regulation of adaptive immune response based on somatic recombination of immune receptors built from immunoglobulin superfamily domains (GO:0002824)	77	4	0.29	+	13.87	0.000242	0.0412
positive regulation of adaptive immune response (GO:0002821)	80	4	0.3	+	13.35	0.000278	0.0446
regulation of leukocyte mediated immunity (GO:0002703)	144	7	0.54	+	12.98	1.57e-06	0.000687
regulation of viral life cycle (GO:1903900)	104	5	0.39	+	12.84	5.55e-05	0.0134
innate immune response (GO:0045087)	238	11	0.89	+	12.34	2.26e-09	2.87e-06
regulation of viral process (GO:0050792)	131	6	0.49	+	12.23	1.26e-05	0.00374
defense response to other organism (GO:0098542)	272	12	1.02	+	11.78	6.65e-10	9.29e-07
regulation of production of molecular mediator of immune response (GO:0002700)	114	5	0.43	+	11.71	8.42e-05	0.0176
immune effector process (GO:0002252)	297	13	1.11	+	11.69	1.34e-10	2.67e-07
positive regulation of innate immune response (GO:0045089)	127	5	0.48	+	10.51	0.000137	0.0259
regulation of symbiosis, encompassing mutualism through parasitism (GO:0043903)	156	6	0.58	+	10.27	3.25e-05	0.00857
regulation of immune effector process (GO:0002697)	261	9	0.98	+	9.21	7.64e-07	0.000368
response to other organism (GO:0051707)	544	17	2.04	+	8.34	2.49e-11	8.68e-08
response to external biotic stimulus (GO:0043207)	547	17	2.05	+	8.3	2.7e-11	7.55e-08
regulation of innate immune response (GO:0045088)	195	6	0.73	+	8.22	0.000108	0.0218
response to biotic stimulus (GO:0009607)	568	17	2.13	+	7.99	4.77e-11	1.11e-07
regulation of multi-organism process (GO:0043900)	306	9	1.15	+	7.85	2.72e-06	0.00106
positive regulation of cytokine production (GO:0001819)	313	9	1.17	+	7.68	3.26e-06	0.00123
immune response (GO:0006955)	562	16	2.1	+	7.6	3.85e-10	6.73e-07
positive regulation of immune response (GO:0050778)	338	9	1.27	+	7.11	5.97e-06	0.00203
response to cytokine (GO:0034097)	518	12	1.94	+	6.19	6.34e-07	0.000328
defense response (GO:0006952)	616	14	2.31	+	6.07	8.42e-08	6.53e-05
cellular response to cytokine stimulus (GO:0071345)	471	10	1.76	+	5.67	1.23e-05	0.00373
positive regulation of immune system process (GO:0002684)	580	12	2.17	+	5.52	2.01e-06	0.000851
regulation of cytokine production (GO:0001817)	491	10	1.84	+	5.44	1.75e-05	0.00488
immune system process (GO:0002376)	1254	25	4.7	+	5.32	3.88e-12	2.71e-08
regulation of immune response (GO:0050776)	502	10	1.88	+	5.32	2.1e-05	0.00565
response to external stimulus (GO:0009605)	1166	20	4.37	+	4.58	1.05e-08	1.05e-05
regulation of immune system process (GO:0002682)	912	14	3.42	+	4.1	8.01e-06	0.00249
multi-organism process (GO:0051704)	1265	19	4.74	+	4.01	2.03e-07	0.000124
response to organic substance (GO:0010033)	1575	21	5.9	+	3.56	2.91e-07	0.000156
small molecule metabolic process (GO:0044281)	1127	14	4.22	+	3.32	7.96e-05	0.0182
cellular response to organic substance (GO:0071310)	1270	14	4.76	+	2.94	0.000273	0.0448
cellular response to chemical stimulus (GO:0070887)	1649	18	6.18	+	2.91	3.62e-05	0.00918
positive regulation of response to stimulus (GO:0048584)	1420	15	5.32	+	2.82	0.000254	0.0422
response to stress (GO:0006950)	1878	19	7.03	+	2.7	5.89e-05	0.0137
