# Supplementary material for: Quantitative Proteomic Analysis Reveals Antiviral and Anti-inflammatory Effects of Puerarin in Piglets Infected With Porcine Epidemic Diarrhea Virus
Source: Front Immunol. 2020 Feb 26;11:169. doi: 10.3389/fimmu.2020.00169 (PMC7055472; doi:10.3389/fimmu.2020.00169)
Supplement: Supplementary file 3 [file Table_3.XLS]

## Sheet: DEPs from PEDV VS Control
Pathway identifier	Pathway name	#Entities found	#Entities total	Entities ratio	Entities pValue	Entities FDR	Negative logarithm（FDR)	#Reactions found	#Reactions total	Reactions ratio	Species identifier	Species name	Submitted entities found	Number of proteins	Mapped entities	Found reaction identifiers
R-HSA-913531	Interferon Signaling	22	392	0.0276934	5.73e-08	1.8e-05	4.74	35	66	0.00544779	9606	Homo sapiens	LOC100513601;SLA-DQA1;RSAD2;DDX58;STAT1;MX2;MX1;ISG15;GBP2;TRIM31;IFIT3;CES1	12		R-HSA-936462;R-HSA-997326;R-HSA-8985153;R-HSA-1169307;R-HSA-873927;R-HSA-873921;R-HSA-873922;R-HSA-909725;R-HSA-909726;R-HSA-909721;R-HSA-909722;R-HSA-1015702;R-HSA-909718;R-HSA-1015699;R-HSA-1678841;R-HSA-1169395;R-HSA-1678843;R-HSA-1169394;R-HSA-1678842;R-HSA-1169397;R-HSA-1169399;R-HSA-1169398;R-HSA-1176059;R-HSA-1169403;R-HSA-1169402;R-HSA-1031716;R-HSA-1169405;R-HSA-877281;R-HSA-1169404;R-HS…
R-HSA-909733	Interferon alpha/beta signaling	15	184	0.0129989	8.35e-08	1.8e-05	4.74	9	20	0.00165085	9606	Homo sapiens	LOC100513601;RSAD2;STAT1;MX2;MX1;ISG15;GBP2;IFIT3	8		R-HSA-909725;R-HSA-997309;R-HSA-909726;R-HSA-913529;R-HSA-909721;R-HSA-909722;R-HSA-1015702;R-HSA-909718;R-HSA-1015699
R-HSA-156902	Peptide chain elongation	10	97	0.0068527	1.65e-06	0.000184	3.73	4	5	0.000413	9606	Homo sapiens	RPS19;RPS29;RPL23;RPL34;RPL37A;RPL11;RPL24;RPL35A	8		R-HSA-156915;R-HSA-156912;R-HSA-156923;R-HSA-156907
R-HSA-8963888	Chylomicron assembly	5	14	0.000989	2.09e-06	0.000184	3.73	4	5	0.000413	9606	Homo sapiens	MTTP;APOC3;APOA1;APOA4;APOE	5		R-HSA-174786;R-HSA-174660;R-HSA-174741;R-HSA-174587
R-HSA-975956	Nonsense Mediated Decay (NMD) independent of the Exon Junction Complex (EJC)	10	101	0.00713529	2.35e-06	0.000184	3.73	1	1	8.25e-05	9606	Homo sapiens	RPS19;RPS29;RPL23;RPL34;RPL37A;RPL11;RPL24;RPL35A	8		R-HSA-927789
R-HSA-156842	Eukaryotic Translation Elongation	10	102	0.00720593	2.56e-06	0.000184	3.73	4	9	0.000743	9606	Homo sapiens	RPS19;RPS29;RPL23;RPL34;RPL37A;RPL11;RPL24;RPL35A	8		R-HSA-156915;R-HSA-156912;R-HSA-156923;R-HSA-156907
R-HSA-72689	Formation of a pool of free 40S subunits	10	106	0.00748852	3.58e-06	0.000193	3.71	2	2	0.000165	9606	Homo sapiens	RPS19;RPS29;RPL23;RPL34;RPL37A;RPL11;RPL24;RPL35A	8		R-HSA-72673;R-HSA-72676
R-HSA-72764	Eukaryotic Translation Termination	10	106	0.00748852	3.58e-06	0.000193	3.71	3	5	0.000413	9606	Homo sapiens	RPS19;RPS29;RPL23;RPL34;RPL37A;RPL11;RPL24;RPL35A	8		R-HSA-141671;R-HSA-141691;R-HSA-141673
R-HSA-192823	Viral mRNA Translation	10	114	0.00805369	6.72e-06	0.000281	3.55	2	2	0.000165	9606	Homo sapiens	RPS19;RPS29;RPL23;RPL34;RPL37A;RPL11;RPL24;RPL35A	8		R-HSA-192704;R-HSA-192841
R-HSA-2408557	Selenocysteine synthesis	10	114	0.00805369	6.72e-06	0.000281	3.55	2	7	0.000578	9606	Homo sapiens	RPS19;RPS29;RPL23;RPL34;RPL37A;RPL11;RPL24;RPL35A	8		R-HSA-2408529;R-HSA-5333615
R-HSA-9609507	Protein localization	12	170	0.0120099	7.22e-06	0.000281	3.55	19	53	0.00437474	9606	Homo sapiens	HMGCL;GSTK1;CHCHD2;DAO;PEX19;ACOX1;IDH1;EHHADH;TIMM13;SLC25A5;OTC	11		R-HSA-1299475;R-HSA-9033515;R-HSA-1268022;R-HSA-1299478;R-HSA-9603797;R-HSA-1307802;R-HSA-1955380;R-HSA-1299481;R-HSA-1299480;R-HSA-9603801;R-HSA-8986181;R-HSA-9603775;R-HSA-9603804;R-HSA-1299484;R-HSA-9033233;R-HSA-9033235;R-HSA-9603784;R-HSA-9033236;R-HSA-9603791
R-HSA-1799339	SRP-dependent cotranslational protein targeting to membrane	10	119	0.00840692	9.72e-06	0.000313	3.5	5	5	0.000413	9606	Homo sapiens	RPS19;RPS29;RPL23;RPL34;RPL37A;RPL11;RPL24;RPL35A	8		R-HSA-1799326;R-HSA-1799330;R-HSA-1799329;R-HSA-1799335;R-HSA-1799332
R-HSA-72706	GTP hydrolysis and joining of the 60S ribosomal subunit	10	120	0.00847757	1.04e-05	0.000313	3.5	3	3	0.000248	9606	Homo sapiens	RPS19;RPS29;RPL23;RPL34;RPL37A;RPL11;RPL24;RPL35A	8		R-HSA-72672;R-HSA-72619;R-HSA-72671
R-HSA-156827	L13a-mediated translational silencing of Ceruloplasmin expression	10	120	0.00847757	1.04e-05	0.000313	3.5	2	3	0.000248	9606	Homo sapiens	RPS19;RPS29;RPL23;RPL34;RPL37A;RPL11;RPL24;RPL35A	8		R-HSA-156823;R-HSA-156826
R-HSA-927802	Nonsense-Mediated Decay (NMD)	10	124	0.00876016	1.38e-05	0.000373	3.43	5	6	0.000495	9606	Homo sapiens	RPS19;RPS29;RPL23;RPL34;RPL37A;RPL11;RPL24;RPL35A	8		R-HSA-927836;R-HSA-927789;R-HSA-927832;R-HSA-927813;R-HSA-927889
R-HSA-975957	Nonsense Mediated Decay (NMD) enhanced by the Exon Junction Complex (EJC)	10	124	0.00876016	1.38e-05	0.000373	3.43	4	5	0.000413	9606	Homo sapiens	RPS19;RPS29;RPL23;RPL34;RPL37A;RPL11;RPL24;RPL35A	8		R-HSA-927836;R-HSA-927832;R-HSA-927813;R-HSA-927889
R-HSA-72613	Eukaryotic Translation Initiation	10	130	0.00918403	2.06e-05	0.000494	3.31	12	21	0.00173339	9606	Homo sapiens	RPS19;RPS29;RPL23;RPL34;RPL37A;RPL11;RPL24;RPL35A	8		R-HSA-72673;R-HSA-72672;R-HSA-72691;R-HSA-72676;R-HSA-156823;R-HSA-72697;R-HSA-156826;R-HSA-72619;R-HSA-156808;R-HSA-157849;R-HSA-72621;R-HSA-72671
R-HSA-72737	Cap-dependent Translation Initiation	10	130	0.00918403	2.06e-05	0.000494	3.31	10	18	0.00148576	9606	Homo sapiens	RPS19;RPS29;RPL23;RPL34;RPL37A;RPL11;RPL24;RPL35A	8		R-HSA-72673;R-HSA-72672;R-HSA-72691;R-HSA-72676;R-HSA-72697;R-HSA-72619;R-HSA-156808;R-HSA-157849;R-HSA-72621;R-HSA-72671
R-HSA-168254	Influenza Infection	12	199	0.0140586	3.35e-05	0.000736	3.13	4	59	0.00487	9606	Homo sapiens	RPS19;RPS29;RPL23;RPL34;RPL37A;RPL11;RPL24;RPL35A;ISG15;SLC25A5	10		R-HSA-192704;R-HSA-1176059;R-HSA-192841;R-HSA-168878
R-HSA-8963898	Plasma lipoprotein assembly	5	30	0.00211939	7.88e-05	0.00165422	2.78	11	19	0.0015683	9606	Homo sapiens	MTTP;APOC3;APOA1;APOA4;APOE	5		R-HSA-216723;R-HSA-174786;R-HSA-264758;R-HSA-216727;R-HSA-174660;R-HSA-216757;R-HSA-216756;R-HSA-174741;R-HSA-174587;R-HSA-349657;R-HSA-8866329
R-HSA-174824	Plasma lipoprotein assembly, remodeling, and clearance	8	98	0.00692335	9.29e-05	0.00185794	2.73	36	84	0.00693355	9606	Homo sapiens	MTTP;APOC3;APOA1;APOA4;APOE;LIPA;CES3	7		R-HSA-349637;R-HSA-174786;R-HSA-266310;R-HSA-174657;R-HSA-349638;R-HSA-8865667;R-HSA-174660;R-HSA-264834;R-HSA-6784622;R-HSA-8858252;R-HSA-266315;R-HSA-216723;R-HSA-174739;R-HSA-264848;R-HSA-216727;R-HSA-174741;R-HSA-349404;R-HSA-174808;R-HSA-349657;R-HSA-266328;R-HSA-8866329;R-HSA-174690;R-HSA-174624;R-HSA-264678;R-HSA-174757;R-HSA-8937442;R-HSA-266089;R-HSA-174706;R-HSA-264758;R-HSA-264695;R-HS…
R-HSA-8963901	Chylomicron remodeling	4	17	0.00120099	0.000114	0.00216038	2.67	3	3	0.000248	9606	Homo sapiens	APOC3;APOA1;APOA4;APOE	4		R-HSA-174690;R-HSA-174739;R-HSA-174757
R-HSA-8868773	rRNA processing in the nucleus and cytosol	11	207	0.0146238	0.000212	0.00381642	2.42	3	15	0.00123814	9606	Homo sapiens	RPS19;RPS29;RPL23;RPL34;RPL37A;RPL11;RPL24;RPL35A;THUMPD1	9		R-HSA-6791223;R-HSA-6791218;R-HSA-6790987
R-HSA-168273	Influenza Viral RNA Transcription and Replication	10	175	0.0123631	0.000233	0.00418585	2.38	2	14	0.00115559	9606	Homo sapiens	RPS19;RPS29;RPL23;RPL34;RPL37A;RPL11;RPL24;RPL35A	8		R-HSA-192704;R-HSA-192841
R-HSA-2408522	Selenoamino acid metabolism	10	182	0.0128576	0.000316	0.00527944	2.28	2	33	0.0027239	9606	Homo sapiens	RPS19;RPS29;RPL23;RPL34;RPL37A;RPL11;RPL24;RPL35A	8		R-HSA-2408529;R-HSA-5333615
R-HSA-9010553	Regulation of expression of SLITs and ROBOs	10	183	0.0129283	0.00033	0.00527944	2.28	2	20	0.00165085	9606	Homo sapiens	RPS19;RPS29;RPL23;RPL34;RPL37A;RPL11;RPL24;RPL35A	8		R-HSA-9014652;R-HSA-9014610
R-HSA-8979227	Triglyceride metabolism	6	66	0.00466266	0.000402	0.0059305	2.23	3	24	0.00198102	9606	Homo sapiens	FABP1;FABP2;GK;FABP6;PLIN3	5		R-HSA-8848355;R-HSA-5334794;R-HSA-75887
R-HSA-168255	Influenza Life Cycle	10	188	0.0132815	0.000407	0.0059305	2.23	2	51	0.00420966	9606	Homo sapiens	RPS19;RPS29;RPL23;RPL34;RPL37A;RPL11;RPL24;RPL35A	8		R-HSA-192704;R-HSA-192841
R-HSA-6791226	Major pathway of rRNA processing in the nucleolus and cytosol	10	189	0.0133522	0.000424	0.0059305	2.23	2	7	0.000578	9606	Homo sapiens	RPS19;RPS29;RPL23;RPL34;RPL37A;RPL11;RPL24;RPL35A	8		R-HSA-6791223;R-HSA-6791218
R-HSA-9033241	Peroxisomal protein import	6	67	0.00473331	0.000435	0.00609464	2.22	4	26	0.0021461	9606	Homo sapiens	HMGCL;GSTK1;DAO;ACOX1;IDH1;EHHADH	6		R-HSA-9033515;R-HSA-9033233;R-HSA-9033235;R-HSA-9033236
R-HSA-164940	Nef mediated downregulation of MHC class I complex cell surface expression	3	11	0.000777	0.000558	0.00725071	2.14	3	4	0.00033	9606	Homo sapiens	AP1S1;AP1M2	2		R-HSA-182263;R-HSA-182279;R-HSA-182286
R-HSA-72312	rRNA processing	11	245	0.0173084	0.000852	0.0110759	1.96	3	21	0.00173339	9606	Homo sapiens	RPS19;RPS29;RPL23;RPL34;RPL37A;RPL11;RPL24;RPL35A;THUMPD1	9		R-HSA-6791223;R-HSA-6791218;R-HSA-6790987
R-HSA-8963899	Plasma lipoprotein remodeling	5	54	0.00381491	0.0011322	0.0147186	1.83	14	30	0.00247627	9606	Homo sapiens	APOC3;APOA1;APOA4;APOE	4		R-HSA-174690;R-HSA-266310;R-HSA-264678;R-HSA-174757;R-HSA-6784622;R-HSA-266089;R-HSA-266315;R-HSA-174739;R-HSA-264695;R-HSA-264689;R-HSA-349404;R-HSA-266303;R-HSA-266328;R-HSA-266299
R-HSA-6798695	Neutrophil degranulation	16	480	0.0339103	0.00150747	0.0180896	1.74	9	10	0.000825	9606	Homo sapiens	CFD;NAPRT1;AOC1;PDXK;MME;IDH1;RNASET2;HP;ITGAL;OLFM4;ALAD;ASC;HK3;SI;ANPEP;TOLLIP	16		R-HSA-6798743;R-HSA-6799350;R-HSA-6800434;R-HSA-6798751;R-HSA-6798749;R-HSA-6798748;R-HSA-6798747;R-HSA-6800426;R-HSA-6798745
R-HSA-844615	The AIM2 inflammasome	2	4	0.000283	0.00154615	0.0185538	1.73	2	4	0.00033	9606	Homo sapiens	ASC;CASP1	2		R-HSA-844620;R-HSA-844618
R-HSA-180897	Vpr-mediated induction of apoptosis by mitochondrial outer membrane permeabilization	2	4	0.000283	0.00154615	0.0185538	1.73	1	2	0.000165	9606	Homo sapiens	SLC25A5	1		R-HSA-180905
R-HSA-376176	Signaling by ROBO receptors	10	235	0.0166019	0.00214408	0.0235849	1.63	2	60	0.00495254	9606	Homo sapiens	RPS19;RPS29;RPL23;RPL34;RPL37A;RPL11;RPL24;RPL35A	8		R-HSA-9014652;R-HSA-9014610
R-HSA-1280215	Cytokine Signaling in Immune system	27	1056	0.0746026	0.002229	0.024519	1.61	102	640	0.0528271	9606	Homo sapiens	SLA-DQA1;RSAD2;MAOB;DDX58;STAT1;MX2;MX1;ISG15;IFIT3;LOC100513601;TOLLIP;CASP3;CASP1;GBP2;TRIM31;CES1	16		R-HSA-936462;R-HSA-1112602;R-HSA-8984963;R-HSA-8987266;R-HSA-1112604;R-HSA-8985988;R-HSA-8984964;R-HSA-8987270;R-HSA-8987033;R-HSA-1112587;R-HSA-8950441;R-HSA-8983983;R-HSA-1031716;R-HSA-1031713;R-HSA-8983996;R-HSA-449073;R-HSA-8950453;R-HSA-8987080;R-HSA-8950733;R-HSA-8984014;R-HSA-8987097;R-HSA-9012689;R-HSA-8984021;R-HSA-8950485;R-HSA-8984023;R-HSA-6788623;R-HSA-6788622;R-HSA-1168767;R-HSA-895…
R-HSA-1430728	Metabolism	70	3635	0.2568	0.00249924	0.0274917	1.56	100	2213	0.182666	9606	Homo sapiens	RPL34;COMT;GBA3;CNDP2;ALAD;HK3;GYS1;SPTLC1;RPS19;UPP1;GSTK1;RPL23;APOA1;APOA4;ACSL3;LSS;PLCB3;ACOX1;EHHADH;RPL37A;PLIN3;RPL24;ALDOB;CES3;FBP1;CES1;NAPRT1;PDXK;ABCB1;OAT;MAOB;RPL11;AK3;BPHL;HMGCL;ALDH1B1;BPNT1;APOE;PCK2;ATP5PF;AOC1;GK;NDUFA4;IDH1;CKMT1A;RPL35A;APOC3;ASNS;ASS1;FABP1;FABP2;DAO;CPS1;FABP6;RPS29;GNAQ;CRYL1;OTC	58		R-HSA-3301943;R-HSA-2404131;R-HSA-2404140;R-HSA-400143;R-HSA-70666;R-HSA-1655828;R-HSA-5696091;R-HSA-2426154;R-HSA-416530;R-HSA-70420;R-HSA-170799;R-HSA-170796;R-HSA-70967;R-HSA-170810;R-HSA-5661290;R-HSA-5333615;R-HSA-197186;R-HSA-71495;R-HSA-201035;R-HSA-71496;R-HSA-170824;R-HSA-170825;R-HSA-70479;R-HSA-964958;R-HSA-2395764;R-HSA-372819;R-HSA-428127;R-HSA-5334794;R-HSA-2395768;R-HSA-964970;R-HS…
R-HSA-8964043	Plasma lipoprotein clearance	4	42	0.00296715	0.00321816	0.0321816	1.49	11	35	0.00288898	9606	Homo sapiens	APOA1;APOE;LIPA;CES3	4		R-HSA-174706;R-HSA-349637;R-HSA-174624;R-HSA-174657;R-HSA-349638;R-HSA-8865667;R-HSA-264848;R-HSA-264834;R-HSA-174808;R-HSA-8937442;R-HSA-8858252
R-HSA-163560	Triglyceride catabolism	4	42	0.00296715	0.00321816	0.0321816	1.49	2	17	0.00140322	9606	Homo sapiens	FABP1;FABP2;FABP6;PLIN3	4		R-HSA-8848355;R-HSA-5334794
R-HSA-1268020	Mitochondrial protein import	5	69	0.0048746	0.00325388	0.0325388	1.49	9	14	0.00115559	9606	Homo sapiens	CHCHD2;IDH1;TIMM13;SLC25A5;OTC	5		R-HSA-1299475;R-HSA-1268022;R-HSA-1299478;R-HSA-1307802;R-HSA-1955380;R-HSA-1299481;R-HSA-1299480;R-HSA-8986181;R-HSA-1299484
R-HSA-983170	Antigen Presentation: Folding, assembly and peptide loading of class I MHC	6	102	0.00720593	0.00361165	0.0358258	1.45	15	16	0.00132068	9606	Homo sapiens	LOC100513601;ERAP2;ERAP1;TAP2;TAP1;TAPBP	6		R-HSA-8951499;R-HSA-983148;R-HSA-983146;R-HSA-983145;R-HSA-983144;R-HSA-983142;R-HSA-983427;R-HSA-983426;R-HSA-983138;R-HSA-983425;R-HSA-983424;R-HSA-983422;R-HSA-983421;R-HSA-983161;R-HSA-983158
R-HSA-164938	Nef-mediates down modulation of cell surface receptors by recruiting them to clathrin adapters	3	22	0.00155422	0.00398065	0.0358258	1.45	3	15	0.00123814	9606	Homo sapiens	AP1S1;AP1M2	2		R-HSA-182263;R-HSA-182279;R-HSA-182286
R-HSA-5663205	Infectious disease	16	540	0.0381491	0.00474129	0.0426716	1.37	8	329	0.0271564	9606	Homo sapiens	RPS19;RPS29;RPL23;RPL34;RPL37A;RPL11;AP1S1;RPL24;RPL35A;ISG15;SLC25A5;AP1M2	12		R-HSA-192704;R-HSA-182263;R-HSA-182279;R-HSA-1176059;R-HSA-180905;R-HSA-192841;R-HSA-168878;R-HSA-182286
R-HSA-8964058	HDL remodeling	3	24	0.00169551	0.00506228	0.0455605	1.34	10	13	0.00107305	9606	Homo sapiens	APOC3;APOA1;APOE	3		R-HSA-266310;R-HSA-264678;R-HSA-264695;R-HSA-264689;R-HSA-349404;R-HSA-266303;R-HSA-266328;R-HSA-266089;R-HSA-266299;R-HSA-266315
R-HSA-2022377	Metabolism of Angiotensinogen to Angiotensins	4	48	0.00339103	0.00514197	0.0462777	1.33	5	20	0.00165085	9606	Homo sapiens	ENPEP;MME;ANPEP;CES1	4		R-HSA-2022399;R-HSA-9619024;R-HSA-2022396;R-HSA-2022393;R-HSA-2022368
R-HSA-168256	Immune System	53	2662	0.188061	0.00525824	0.0473242	1.32	228	1527	0.126042	9606	Homo sapiens	CFD;NAPRT1;PDXK;MAOB;HP;WAS;ITGAL;IFIT3;ALAD;LOC100513601;HK3;ASC;CASP3;SI;ANPEP;DHX58;CASP1;AP1S1;GBP2;AP1M2;HERC6;SLA-DQA1;AOC1;MME;RSAD2;ERAP2;DDX58;STAT1;MX2;IDH1;RNASET2;MX1;ERAP1;TAP2;TAP1;ISG15;OLFM4;TAPBP;TOLLIP;TRIM31;CES1	41		R-HSA-936462;R-HSA-199169;R-HSA-202245;R-HSA-1112602;R-HSA-8987266;R-HSA-202248;R-HSA-1112604;R-HSA-2130478;R-HSA-8987270;R-HSA-936475;R-HSA-2130486;R-HSA-1112587;R-HSA-8950441;R-HSA-1031716;R-HSA-8863914;R-HSA-1031713;R-HSA-202291;R-HSA-449073;R-HSA-8950453;R-HSA-202307;R-HSA-8951498;R-HSA-8951499;R-HSA-8951500;R-HSA-6800426;R-HSA-6800434;R-HSA-8950485;R-HSA-8863973;R-HSA-430180;R-HSA-983148;R-H…
R-HSA-400451	Free fatty acids regulate insulin secretion	3	27	0.00190745	0.00698824	0.0559059	1.25	5	7	0.000578	9606	Homo sapiens	PLCB3;GNAQ;ACSL3	3		R-HSA-400023;R-HSA-416530;R-HSA-399998;R-HSA-434382;R-HSA-400027
R-HSA-1169408	ISG15 antiviral mechanism	5	83	0.00586365	0.00699855	0.0559884	1.25	16	16	0.00132068	9606	Homo sapiens	STAT1;DDX58;MX2;MX1;ISG15	5		R-HSA-1678841;R-HSA-936462;R-HSA-1169395;R-HSA-1678843;R-HSA-1169394;R-HSA-1678842;R-HSA-1169397;R-HSA-1169399;R-HSA-1169398;R-HSA-1169307;R-HSA-1176059;R-HSA-1169403;R-HSA-1169402;R-HSA-1169405;R-HSA-1169404;R-HSA-1169406
R-HSA-164952	The role of Nef in HIV-1 replication and disease pathogenesis	3	29	0.00204875	0.00848259	0.0678607	1.17	3	20	0.00165085	9606	Homo sapiens	AP1S1;AP1M2	2		R-HSA-182263;R-HSA-182279;R-HSA-182286
R-HSA-379398	Enzymatic degradation of Dopamine by monoamine oxidase	2	10	0.000706	0.00913906	0.0703062	1.15	2	2	0.000165	9606	Homo sapiens	MAOB;COMT	2		R-HSA-379382;R-HSA-379464
R-HSA-8949275	RUNX3 Regulates Immune Response and Cell Migration	2	10	0.000706	0.00913906	0.0703062	1.15	2	5	0.000413	9606	Homo sapiens	ITGAL	1		R-HSA-8949343;R-HSA-8949335
R-HSA-72766	Translation	11	339	0.0239491	0.00970437	0.0703062	1.15	25	99	0.00817169	9606	Homo sapiens	WARS;RPS19;RPS29;RPL23;RPL34;RPL37A;RPL11;RPL24;RPL35A	9		R-HSA-1799326;R-HSA-156808;R-HSA-379977;R-HSA-156823;R-HSA-156826;R-HSA-157849;R-HSA-72671;R-HSA-72673;R-HSA-72672;R-HSA-72676;R-HSA-141671;R-HSA-156907;R-HSA-72619;R-HSA-141673;R-HSA-72621;R-HSA-156915;R-HSA-156912;R-HSA-72691;R-HSA-72697;R-HSA-156923;R-HSA-1799330;R-HSA-141691;R-HSA-1799329;R-HSA-1799335;R-HSA-1799332
R-HSA-877300	Interferon gamma signaling	9	250	0.0176616	0.0100437	0.0703062	1.15	9	15	0.00123814	9606	Homo sapiens	LOC100513601;SLA-DQA1;STAT1;GBP2;TRIM31;CES1	6		R-HSA-873917;R-HSA-997326;R-HSA-873927;R-HSA-1031716;R-HSA-873921;R-HSA-877281;R-HSA-909552;R-HSA-1031713;R-HSA-873922
R-HSA-70635	Urea cycle	3	32	0.00226069	0.0110508	0.0773559	1.11	3	8	0.00066	9606	Homo sapiens	CPS1;ASS1;OTC	3		R-HSA-70577;R-HSA-70560;R-HSA-70555
R-HSA-1169410	Antiviral mechanism by IFN-stimulated genes	5	94	0.00664076	0.0115251	0.0806755	1.09	17	31	0.00255881	9606	Homo sapiens	STAT1;DDX58;MX2;MX1;ISG15	5		R-HSA-1678841;R-HSA-936462;R-HSA-1169395;R-HSA-1678843;R-HSA-1169394;R-HSA-1678842;R-HSA-1169397;R-HSA-1169399;R-HSA-1169398;R-HSA-8985153;R-HSA-1169307;R-HSA-1176059;R-HSA-1169403;R-HSA-1169402;R-HSA-1169405;R-HSA-1169404;R-HSA-1169406
R-HSA-432722	Golgi Associated Vesicle Biogenesis	4	61	0.00430943	0.0116448	0.0815135	1.09	4	7	0.000578	9606	Homo sapiens	TFRC;AP1S1;AP1M2	3		R-HSA-421831;R-HSA-421836;R-HSA-421835;R-HSA-421833
R-HSA-1989781	PPARA activates gene expression	7	174	0.0122925	0.0128135	0.0896942	1.05	4	41	0.00338423	9606	Homo sapiens	FABP1;ABCB1;ACOX1;APOA1	4		R-HSA-1989754;R-HSA-1989751;R-HSA-1989749;R-HSA-1989762
R-HSA-400206	Regulation of lipid metabolism by Peroxisome proliferator-activated receptor alpha (PPARalpha)	7	176	0.0124338	0.0135615	0.0901338	1.05	5	44	0.00363186	9606	Homo sapiens	FABP1;ABCB1;ACOX1;APOA1	4		R-HSA-1989754;R-HSA-400143;R-HSA-1989751;R-HSA-1989749;R-HSA-1989762
R-HSA-71291	Metabolism of amino acids and derivatives	17	660	0.0466266	0.0136084	0.0901338	1.05	10	283	0.0233595	9606	Homo sapiens	OAT;CKMT1A;RPL23;RPL34;RPL11;ASNS;RPL35A;ASS1;DAO;RPS19;CPS1;RPS29;RPL37A;RPL24;OTC	15		R-HSA-70577;R-HSA-70560;R-HSA-2408529;R-HSA-200326;R-HSA-70599;R-HSA-389821;R-HSA-70555;R-HSA-70666;R-HSA-5333615;R-HSA-70654
R-HSA-141333	Biogenic amines are oxidatively deaminated to aldehydes by MAOA and MAOB	2	13	0.000918	0.0150223	0.0901338	1.05	3	3	0.000248	9606	Homo sapiens	MAOB	1		R-HSA-141202;R-HSA-141186;R-HSA-141200
R-HSA-379397	Enzymatic degradation of dopamine by COMT	2	14	0.000989	0.0172623	0.103574	0.98	2	3	0.000248	9606	Homo sapiens	MAOB;COMT	2		R-HSA-379395;R-HSA-379387
R-HSA-432720	Lysosome Vesicle Biogenesis	3	43	0.0030378	0.0239611	0.143766	0.84	5	8	0.00066	9606	Homo sapiens	AP1S1;AP1M2	2		R-HSA-432706;R-HSA-432707;R-HSA-432688;R-HSA-5333658;R-HSA-432712
R-HSA-379401	Dopamine clearance from the synaptic cleft	2	17	0.00120099	0.0247596	0.148558	0.83	4	6	0.000495	9606	Homo sapiens	MAOB;COMT	2		R-HSA-379382;R-HSA-379395;R-HSA-379464;R-HSA-379387
R-HSA-1059683	Interleukin-6 signaling	2	17	0.00120099	0.0247596	0.148558	0.83	6	19	0.0015683	9606	Homo sapiens	STAT1	1		R-HSA-1112565;R-HSA-1112727;R-HSA-1112602;R-HSA-1112538;R-HSA-1112587;R-HSA-1112604
R-HSA-975634	Retinoid metabolism and transport	4	79	0.00558107	0.0269791	0.161875	0.79	9	28	0.00231118	9606	Homo sapiens	APOC3;APOA1;APOA4;APOE	4		R-HSA-2395764;R-HSA-2187332;R-HSA-2404131;R-HSA-2404140;R-HSA-2424254;R-HSA-2395768;R-HSA-2395784;R-HSA-2423785;R-HSA-2429643
R-HSA-5657560	Hereditary fructose intolerance	1	2	0.000141	0.0280023	0.166695	0.78	1	1	8.25e-05	9606	Homo sapiens	ALDOB	1		R-HSA-5656438
R-HSA-199992	trans-Golgi Network Vesicle Budding	4	80	0.00565171	0.0280685	0.166695	0.78	9	19	0.0015683	9606	Homo sapiens	TFRC;AP1S1;AP1M2	3		R-HSA-421831;R-HSA-432706;R-HSA-432707;R-HSA-432688;R-HSA-421836;R-HSA-5333658;R-HSA-421835;R-HSA-432712;R-HSA-421833
R-HSA-434316	Fatty Acids bound to GPR40 (FFAR1) regulate insulin secretion	2	19	0.00134228	0.0303654	0.166695	0.78	4	5	0.000413	9606	Homo sapiens	PLCB3;GNAQ	2		R-HSA-400023;R-HSA-416530;R-HSA-399998;R-HSA-400027
R-HSA-399997	Acetylcholine regulates insulin secretion	2	19	0.00134228	0.0303654	0.166695	0.78	4	7	0.000578	9606	Homo sapiens	PLCB3;GNAQ	2		R-HSA-400023;R-HSA-399998;R-HSA-400027;R-HSA-399995
R-HSA-6803207	TP53 Regulates Transcription of Caspase Activators and Caspases	2	20	0.00141293	0.033339	0.166695	0.78	2	17	0.00140322	9606	Homo sapiens	CASP1	1		R-HSA-6798082;R-HSA-6798081
R-HSA-140179	Amine Oxidase reactions	2	22	0.00155422	0.0396089	0.198044	0.7	3	6	0.000495	9606	Homo sapiens	MAOB	1		R-HSA-141202;R-HSA-141186;R-HSA-141200
R-HSA-5619073	Defective GCK causes maturity-onset diabetes of the young 2 (MODY2)	1	3	0.000212	0.0417095	0.208547	0.68	1	1	8.25e-05	9606	Homo sapiens	GK	1		R-HSA-5621918
R-HSA-844456	The NLRP3 inflammasome	2	23	0.00162487	0.042898	0.21449	0.67	3	18	0.00148576	9606	Homo sapiens	ASC;CASP1	2		R-HSA-844612;R-HSA-877361;R-HSA-844610
R-HSA-6806667	Metabolism of fat-soluble vitamins	4	94	0.00664076	0.0460675	0.230338	0.64	9	34	0.00280644	9606	Homo sapiens	APOC3;APOA1;APOA4;APOE	4		R-HSA-2395764;R-HSA-2187332;R-HSA-2404131;R-HSA-2404140;R-HSA-2424254;R-HSA-2395768;R-HSA-2395784;R-HSA-2423785;R-HSA-2429643
R-HSA-70326	Glucose metabolism	5	142	0.0100318	0.0532268	0.256505	0.59	10	50	0.00412711	9606	Homo sapiens	HK3;GK;ALDOB;FBP1;PCK2	5		R-HSA-70420;R-HSA-372819;R-HSA-71495;R-HSA-170810;R-HSA-71496;R-HSA-170824;R-HSA-170825;R-HSA-170799;R-HSA-70479;R-HSA-170796
R-HSA-189085	Digestion of dietary carbohydrate	2	26	0.00183681	0.053341	0.256505	0.59	7	13	0.00107305	9606	Homo sapiens	SI	1		R-HSA-5659861;R-HSA-191108;R-HSA-189102;R-HSA-191116;R-HSA-191101;R-HSA-189053;R-HSA-189069
R-HSA-3828062	Glycogen storage disease type 0 (muscle GYS1)	1	4	0.000283	0.0552243	0.256505	0.59	1	1	8.25e-05	9606	Homo sapiens	GYS1	1		R-HSA-3828061
R-HSA-5678771	Defective ABCB4 causes progressive familial intrahepatic cholestasis 3, intrahepatic cholestasis of pregnancy 3 and gallbladder disease 1	1	4	0.000283	0.0552243	0.256505	0.59	1	1	8.25e-05	9606	Homo sapiens	ABCB1	1		R-HSA-5678749
R-HSA-3814836	Glycogen storage disease type XV (GYG1)	1	4	0.000283	0.0552243	0.256505	0.59	1	1	8.25e-05	9606	Homo sapiens	GYS1	1		R-HSA-3814838
R-HSA-168277	Influenza Virus Induced Apoptosis	1	4	0.000283	0.0552243	0.256505	0.59	1	2	0.000165	9606	Homo sapiens	SLC25A5	1		R-HSA-168878
R-HSA-211736	Stimulation of the cell death response by PAK-2p34	1	4	0.000283	0.0552243	0.256505	0.59	1	4	0.00033	9606	Homo sapiens	CASP3	1		R-HSA-211651
R-HSA-912694	Regulation of IFNA signaling	2	28	0.0019781	0.0607495	0.256505	0.59	1	5	0.000413	9606	Homo sapiens	STAT1	1		R-HSA-997309
R-HSA-8964038	LDL clearance	2	28	0.0019781	0.0607495	0.256505	0.59	2	19	0.0015683	9606	Homo sapiens	LIPA;CES3	2		R-HSA-8865667;R-HSA-8937442
R-HSA-162909	Host Interactions of HIV factors	5	150	0.010597	0.0641263	0.256505	0.59	4	54	0.00445728	9606	Homo sapiens	AP1S1;SLC25A5;AP1M2	3		R-HSA-182263;R-HSA-182279;R-HSA-180905;R-HSA-182286
R-HSA-1369062	ABC transporters in lipid homeostasis	2	29	0.00204875	0.0645782	0.258313	0.59	2	11	0.000908	9606	Homo sapiens	PEX19;APOA1	2		R-HSA-382613;R-HSA-382553
R-HSA-6783589	Interleukin-6 family signaling	2	30	0.00211939	0.0684858	0.273943	0.56	6	33	0.0027239	9606	Homo sapiens	STAT1	1		R-HSA-1112565;R-HSA-1112727;R-HSA-1112602;R-HSA-1112538;R-HSA-1112587;R-HSA-1112604
R-HSA-8963889	Assembly of active LPL and LIPC lipase complexes	2	30	0.00211939	0.0684858	0.273943	0.56	1	12	0.000991	9606	Homo sapiens	APOA4	1		R-HSA-6784622
R-HSA-5579012	Defective MAOA causes Brunner syndrome (BRUNS)	1	5	0.000353	0.0685495	0.274198	0.56	1	1	8.25e-05	9606	Homo sapiens	MAOB	1		R-HSA-5603108
R-HSA-5682113	Defective ABCA1 causes Tangier disease	1	5	0.000353	0.0685495	0.274198	0.56	1	1	8.25e-05	9606	Homo sapiens	APOA1	1		R-HSA-5682111
R-HSA-844623	The IPAF inflammasome	1	5	0.000353	0.0685495	0.274198	0.56	1	2	0.000165	9606	Homo sapiens	CASP1	1		R-HSA-844617
R-HSA-380095	Tachykinin receptors bind tachykinins	1	5	0.000353	0.0685495	0.274198	0.56	1	3	0.000248	9606	Homo sapiens	MYO1A	1		R-HSA-383373
R-HSA-70263	Gluconeogenesis	3	68	0.00480396	0.0736402	0.294561	0.53	3	26	0.0021461	9606	Homo sapiens	ALDOB;FBP1;PCK2	3		R-HSA-372819;R-HSA-71495;R-HSA-70479
R-HSA-380994	ATF4 activates genes in response to endoplasmic reticulum stress	2	32	0.00226069	0.076526	0.306104	0.51	1	7	0.000578	9606	Homo sapiens	ASNS	1		R-HSA-1791118
R-HSA-622312	Inflammasomes	2	33	0.00233133	0.0806528	0.32224	0.49	6	28	0.00231118	9606	Homo sapiens	ASC;CASP1	2		R-HSA-844620;R-HSA-844617;R-HSA-844618;R-HSA-844612;R-HSA-877361;R-HSA-844610
R-HSA-75109	Triglyceride biosynthesis	2	33	0.00233133	0.0806528	0.32224	0.49	1	7	0.000578	9606	Homo sapiens	GK	1		R-HSA-75887
R-HSA-83936	Transport of nucleosides and free purine and pyrimidine bases across the plasma membrane	2	33	0.00233133	0.0806528	0.32224	0.49	1	16	0.00132068	9606	Homo sapiens	SLC25A5	1		R-HSA-163215
R-HSA-2978092	Abnormal conversion of 2-oxoglutarate to 2-hydroxyglutarate	1	6	0.000424	0.0816876	0.32224	0.49	1	1	8.25e-05	9606	Homo sapiens	IDH1	1		R-HSA-880053
R-HSA-205025	NADE modulates death signalling	1	6	0.000424	0.0816876	0.32224	0.49	1	3	0.000248	9606	Homo sapiens	CASP3	1		R-HSA-205117
R-HSA-173736	Alternative complement activation	1	6	0.000424	0.0816876	0.32224	0.49	2	9	0.000743	9606	Homo sapiens	CFD	1		R-HSA-183122;R-HSA-173745
R-HSA-936440	Negative regulators of DDX58/IFIH1 signaling	2	36	0.00254327	0.0934274	0.32224	0.49	10	13	0.00107305	9606	Homo sapiens	DDX58;ISG15	2		R-HSA-936462;R-HSA-990526;R-HSA-937343;R-HSA-936412;R-HSA-936381;R-HSA-936378;R-HSA-936475;R-HSA-936390;R-HSA-936563;R-HSA-990528
R-HSA-111464	SMAC(DIABLO)-mediated dissociation of IAP:caspase complexes	1	7	0.000495	0.0946413	0.32224	0.49	1	3	0.000248	9606	Homo sapiens	CASP3	1		R-HSA-114419
R-HSA-111463	SMAC (DIABLO) binds to IAPs	1	7	0.000495	0.0946413	0.32224	0.49	1	4	0.00033	9606	Homo sapiens	CASP3	1		R-HSA-114306
R-HSA-382551	Transport of small molecules	19	967	0.0683151	0.0953139	0.32224	0.49	53	436	0.0359884	9606	Homo sapiens	ABCB1;PEX19;TFRC;MTTP;APOC3;APOA1;APOA4;LIPA;ALAD;CLCA1;APOE;SLC25A5;CES3;CLCA4;SLC27A4	15		R-HSA-2744361;R-HSA-8865667;R-HSA-264834;R-HSA-6784622;R-HSA-8858252;R-HSA-163215;R-HSA-216723;R-HSA-382613;R-HSA-174739;R-HSA-264848;R-HSA-216727;R-HSA-174741;R-HSA-2744242;R-HSA-8866329;R-HSA-917807;R-HSA-174624;R-HSA-5678706;R-HSA-174757;R-HSA-264758;R-HSA-216757;R-HSA-216756;R-HSA-917814;R-HSA-266303;R-HSA-266299;R-HSA-349637;R-HSA-174786;R-HSA-917839;R-HSA-266310;R-HSA-174657;R-HSA-349638;R-…
R-HSA-382556	ABC-family proteins mediated transport	4	124	0.00876016	0.101637	0.32224	0.49	4	28	0.00231118	9606	Homo sapiens	ABCB1;PEX19;APOA1	3		R-HSA-382613;R-HSA-5678706;R-HSA-1467457;R-HSA-382553
R-HSA-390247	Beta-oxidation of very long chain fatty acids	2	38	0.00268456	0.102246	0.32224	0.49	3	12	0.000991	9606	Homo sapiens	ACOX1;EHHADH	2		R-HSA-390256;R-HSA-6809264;R-HSA-6809263
R-HSA-448706	Interleukin-1 processing	1	8	0.000565	0.107413	0.32224	0.49	4	5	0.000413	9606	Homo sapiens	CASP1	1		R-HSA-448678;R-HSA-448673;R-HSA-448702;R-HSA-448703
R-HSA-5659898	Intestinal saccharidase deficiencies	1	8	0.000565	0.107413	0.32224	0.49	4	5	0.000413	9606	Homo sapiens	SI	1		R-HSA-5659926;R-HSA-5659879;R-HSA-5659922;R-HSA-5659899
R-HSA-389542	NADPH regeneration	1	8	0.000565	0.107413	0.32224	0.49	2	3	0.000248	9606	Homo sapiens	IDH1	1		R-HSA-389540;R-HSA-389550
R-HSA-5660668	CLEC7A/inflammasome pathway	1	8	0.000565	0.107413	0.32224	0.49	2	4	0.00033	9606	Homo sapiens	ASC	1		R-HSA-5660662;R-HSA-5660663
R-HSA-111459	Activation of caspases through apoptosome-mediated cleavage	1	8	0.000565	0.107413	0.32224	0.49	1	2	0.000165	9606	Homo sapiens	CASP3	1		R-HSA-114252
R-HSA-111469	SMAC, XIAP-regulated apoptotic response	1	8	0.000565	0.107413	0.32224	0.49	3	10	0.000825	9606	Homo sapiens	CASP3	1		R-HSA-114419;R-HSA-9627104;R-HSA-114306
R-HSA-9033500	TYSND1 cleaves peroxisomal proteins	1	8	0.000565	0.107413	0.32224	0.49	1	7	0.000578	9606	Homo sapiens	ACOX1	1		R-HSA-9033515
R-HSA-5663084	Diseases of carbohydrate metabolism	3	81	0.00572236	0.109383	0.32815	0.48	9	44	0.00363186	9606	Homo sapiens	GYS1;SI;ALDOB	3		R-HSA-5659926;R-HSA-5656438;R-HSA-5659879;R-HSA-3797226;R-HSA-5659922;R-HSA-3828061;R-HSA-3791349;R-HSA-3814838;R-HSA-5659899
R-HSA-381042	PERK regulates gene expression	2	40	0.00282586	0.111283	0.333848	0.48	1	11	0.000908	9606	Homo sapiens	ASNS	1		R-HSA-1791118
R-HSA-917937	Iron uptake and transport	3	83	0.00586365	0.115387	0.337266	0.47	7	34	0.00280644	9606	Homo sapiens	ALAD;TFRC	2		R-HSA-5690886;R-HSA-917807;R-HSA-917839;R-HSA-5691154;R-HSA-917835;R-HSA-917814;R-HSA-917987
R-HSA-8964011	HDL clearance	1	9	0.000636	0.120006	0.337266	0.47	5	5	0.000413	9606	Homo sapiens	APOA1	1		R-HSA-349637;R-HSA-349638;R-HSA-264848;R-HSA-264834;R-HSA-8858252
R-HSA-8964026	Chylomicron clearance	1	9	0.000636	0.120006	0.337266	0.47	4	4	0.00033	9606	Homo sapiens	APOE	1		R-HSA-174706;R-HSA-174624;R-HSA-174657;R-HSA-174808
R-HSA-434313	Intracellular metabolism of fatty acids regulates insulin secretion	1	9	0.000636	0.120006	0.337266	0.47	1	2	0.000165	9606	Homo sapiens	ACSL3	1		R-HSA-434382
R-HSA-8866423	VLDL assembly	1	9	0.000636	0.120006	0.337266	0.47	1	5	0.000413	9606	Homo sapiens	MTTP	1		R-HSA-8866329
R-HSA-112311	Neurotransmitter clearance	2	44	0.00310844	0.129936	0.337266	0.47	5	11	0.000908	9606	Homo sapiens	MAOB;COMT	2		R-HSA-141186;R-HSA-379382;R-HSA-379395;R-HSA-379464;R-HSA-379387
R-HSA-114608	Platelet degranulation	4	137	0.00967856	0.132256	0.337266	0.47	3	11	0.000908	9606	Homo sapiens	CFD;ITIH4;ITIH3;APOA1	4		R-HSA-482770;R-HSA-481009;R-HSA-481007
R-HSA-5619108	Defective SLC27A4 causes ichthyosis prematurity syndrome (IPS)	1	10	0.000706	0.132422	0.337266	0.47	1	1	8.25e-05	9606	Homo sapiens	SLC27A4	1		R-HSA-5627891
R-HSA-2161517	Abacavir transmembrane transport	1	10	0.000706	0.132422	0.337266	0.47	1	3	0.000248	9606	Homo sapiens	ABCB1	1		R-HSA-2161538
R-HSA-211945	Phase I - Functionalization of compounds	7	298	0.0210526	0.13398	0.337266	0.47	8	98	0.00808915	9606	Homo sapiens	AOC1;ALDH1B1;MAOB;CES3;BPHL;CES1	6		R-HSA-141202;R-HSA-141186;R-HSA-141200;R-HSA-5696131;R-HSA-6784959;R-HSA-8937442;R-HSA-5696091;R-HSA-5693691
R-HSA-176033	Interactions of Vpr with host cellular proteins	2	47	0.00332038	0.144365	0.337266	0.47	1	4	0.00033	9606	Homo sapiens	SLC25A5	1		R-HSA-180905
R-HSA-351906	Apoptotic cleavage of cell adhesion proteins	1	11	0.000777	0.144663	0.337266	0.47	10	10	0.000825	9606	Homo sapiens	CASP3	1		R-HSA-351877;R-HSA-351876;R-HSA-202917;R-HSA-201636;R-HSA-201595;R-HSA-202939;R-HSA-351871;R-HSA-202969;R-HSA-351913;R-HSA-201631
R-HSA-3785653	Myoclonic epilepsy of Lafora	1	11	0.000777	0.144663	0.337266	0.47	2	2	0.000165	9606	Homo sapiens	GYS1	1		R-HSA-3797226;R-HSA-3791349
R-HSA-8985947	Interleukin-9 signaling	1	11	0.000777	0.144663	0.337266	0.47	6	12	0.000991	9606	Homo sapiens	STAT1	1		R-HSA-8985929;R-HSA-8985981;R-HSA-8985900;R-HSA-8985966;R-HSA-8985988;R-HSA-8985943
R-HSA-3000480	Scavenging by Class A Receptors	2	48	0.00339103	0.149247	0.337266	0.47	2	10	0.000825	9606	Homo sapiens	APOA1;APOE	2		R-HSA-2173778;R-HSA-2507854
R-HSA-76005	Response to elevated platelet cytosolic Ca2+	4	144	0.0101731	0.150143	0.337266	0.47	3	14	0.00115559	9606	Homo sapiens	CFD;ITIH4;ITIH3;APOA1	4		R-HSA-482770;R-HSA-481009;R-HSA-481007
R-HSA-351202	Metabolism of polyamines	4	144	0.0101731	0.150143	0.337266	0.47	4	38	0.00313661	9606	Homo sapiens	CPS1;CKMT1A;ASS1;OTC	4		R-HSA-70577;R-HSA-70560;R-HSA-200326;R-HSA-70555
R-HSA-211859	Biological oxidations	11	545	0.0385023	0.154937	0.337266	0.47	12	188	0.015518	9606	Homo sapiens	GSTK1;AOC1;ALDH1B1;MAOB;BPNT1;COMT;CES3;BPHL;CES1;CNDP2	10		R-HSA-141202;R-HSA-141186;R-HSA-141200;R-HSA-3301943;R-HSA-1247910;R-HSA-5696131;R-HSA-6784959;R-HSA-8937442;R-HSA-176606;R-HSA-175983;R-HSA-5696091;R-HSA-5693691
R-HSA-264870	Caspase-mediated cleavage of cytoskeletal proteins	1	12	0.000848	0.156733	0.337266	0.47	7	10	0.000825	9606	Homo sapiens	CASP3	1		R-HSA-201639;R-HSA-202967;R-HSA-201622;R-HSA-202966;R-HSA-201608;R-HSA-201629;R-HSA-201628
R-HSA-418889	Caspase activation via Dependence Receptors in the absence of ligand	1	12	0.000848	0.156733	0.337266	0.47	4	8	0.00066	9606	Homo sapiens	CASP3	1		R-HSA-418852;R-HSA-418846;R-HSA-418845;R-HSA-373705
R-HSA-190873	Gap junction degradation	1	12	0.000848	0.156733	0.337266	0.47	2	4	0.00033	9606	Homo sapiens	MYO6	1		R-HSA-190519;R-HSA-190829
R-HSA-9020958	Interleukin-21 signaling	1	12	0.000848	0.156733	0.337266	0.47	2	5	0.000413	9606	Homo sapiens	STAT1	1		R-HSA-9006873;R-HSA-9006870
R-HSA-168928	DDX58/IFIH1-mediated induction of interferon-alpha/beta	3	96	0.00678206	0.157162	0.337266	0.47	29	46	0.00379695	9606	Homo sapiens	DDX58;DHX58;ISG15	3		R-HSA-936462;R-HSA-936390;R-HSA-168909;R-HSA-990528;R-HSA-936412;R-HSA-933532;R-HSA-933530;R-HSA-936475;R-HSA-918232;R-HSA-933528;R-HSA-933526;R-HSA-918230;R-HSA-933527;R-HSA-918229;R-HSA-933525;R-HSA-918227;R-HSA-933523;R-HSA-918224;R-HSA-918225;R-HSA-168934;R-HSA-168935;R-HSA-933538;R-HSA-933539;R-HSA-933537;R-HSA-990526;R-HSA-937343;R-HSA-936381;R-HSA-936378;R-HSA-936563
R-HSA-2980736	Peptide hormone metabolism	4	147	0.010385	0.15808	0.337266	0.47	5	63	0.00520016	9606	Homo sapiens	ENPEP;MME;ANPEP;CES1	4		R-HSA-2022399;R-HSA-9619024;R-HSA-2022396;R-HSA-2022393;R-HSA-2022368
R-HSA-168253	Host Interactions with Influenza Factors	2	50	0.00353232	0.159107	0.337266	0.47	2	8	0.00066	9606	Homo sapiens	ISG15;SLC25A5	2		R-HSA-1176059;R-HSA-168878
R-HSA-1433557	Signaling by SCF-KIT	2	50	0.00353232	0.159107	0.337266	0.47	4	36	0.00297152	9606	Homo sapiens	STAT1	1		R-HSA-1433456;R-HSA-1470012;R-HSA-1470010;R-HSA-1470009
R-HSA-2132295	MHC class II antigen presentation	4	148	0.0104557	0.16076	0.337266	0.47	24	26	0.0021461	9606	Homo sapiens	SLA-DQA1;AP1S1;AP1M2	3		R-HSA-2130336;R-HSA-2213248;R-HSA-8951498;R-HSA-2130500;R-HSA-8951500;R-HSA-2130725;R-HSA-2130504;R-HSA-2130378;R-HSA-2130731;R-HSA-2130349;R-HSA-2130478;R-HSA-2130640;R-HSA-2130641;R-HSA-2213235;R-HSA-2213236;R-HSA-2130486;R-HSA-2213239;R-HSA-2213241;R-HSA-2130393;R-HSA-8856157;R-HSA-2213243;R-HSA-2130619;R-HSA-2213244;R-HSA-2213246
R-HSA-933543	NF-kB activation through FADD/RIP-1 pathway mediated by caspase-8 and -10	1	13	0.000918	0.168633	0.337266	0.47	5	5	0.000413	9606	Homo sapiens	DDX58	1		R-HSA-933532;R-HSA-168934;R-HSA-933526;R-HSA-933539;R-HSA-933523
R-HSA-380612	Metabolism of serotonin	1	13	0.000918	0.168633	0.337266	0.47	1	2	0.000165	9606	Homo sapiens	MAOB	1		R-HSA-141186
R-HSA-9020956	Interleukin-27 signaling	1	13	0.000918	0.168633	0.337266	0.47	5	20	0.00165085	9606	Homo sapiens	STAT1	1		R-HSA-8950441;R-HSA-8950733;R-HSA-8950782;R-HSA-8950485;R-HSA-8950518
R-HSA-140342	Apoptosis induced DNA fragmentation	1	13	0.000918	0.168633	0.337266	0.47	3	12	0.000991	9606	Homo sapiens	CASP3	1		R-HSA-211219;R-HSA-211186;R-HSA-211190
R-HSA-8864260	Transcriptional regulation by the AP-2 (TFAP2) family of transcription factors	2	52	0.00367361	0.169085	0.33817	0.47	2	44	0.00363186	9606	Homo sapiens	APOE	1		R-HSA-8869575;R-HSA-8869590
R-HSA-72695	Formation of the ternary complex, and subsequently, the 43S complex	2	54	0.00381491	0.179166	0.347177	0.46	1	3	0.000248	9606	Homo sapiens	RPS19;RPS29	2		R-HSA-72691
R-HSA-6811440	Retrograde transport at the Trans-Golgi-Network	2	55	0.00388555	0.18424	0.347177	0.46	6	20	0.00165085	9606	Homo sapiens	PLIN3;NAPG	2		R-HSA-6814678;R-HSA-6814676;R-HSA-6814675;R-HSA-6814670;R-HSA-6814684;R-HSA-6814683
R-HSA-110362	POLB-Dependent Long Patch Base Excision Repair	1	15	0.0010597	0.191934	0.347177	0.46	1	10	0.000825	9606	Homo sapiens	ADPRHL2	1		R-HSA-8952903
R-HSA-111461	Cytochrome c-mediated apoptotic response	1	15	0.0010597	0.191934	0.347177	0.46	1	12	0.000991	9606	Homo sapiens	CASP3	1		R-HSA-114252
R-HSA-8983711	OAS antiviral response	1	15	0.0010597	0.191934	0.347177	0.46	1	15	0.00123814	9606	Homo sapiens	DDX58	1		R-HSA-8985153
R-HSA-422356	Regulation of insulin secretion	3	106	0.00748852	0.191988	0.347177	0.46	6	34	0.00280644	9606	Homo sapiens	PLCB3;GNAQ;ACSL3	3		R-HSA-400023;R-HSA-416530;R-HSA-399998;R-HSA-434382;R-HSA-400027;R-HSA-399995
R-HSA-425397	Transport of vitamins, nucleosides, and related molecules	3	108	0.00762981	0.199176	0.347177	0.46	2	39	0.00321915	9606	Homo sapiens	SLC25A5;SLC27A4	2		R-HSA-879585;R-HSA-163215
R-HSA-202433	Generation of second messenger molecules	2	58	0.00409749	0.199582	0.347177	0.46	4	17	0.00140322	9606	Homo sapiens	SLA-DQA1;WAS	2		R-HSA-430180;R-HSA-202245;R-HSA-202248;R-HSA-202216
R-HSA-877312	Regulation of IFNG signaling	1	16	0.00113034	0.20334	0.347177	0.46	2	4	0.00033	9606	Homo sapiens	STAT1	1		R-HSA-997326;R-HSA-877281
R-HSA-8984722	Interleukin-35 Signalling	1	16	0.00113034	0.20334	0.347177	0.46	12	26	0.0021461	9606	Homo sapiens	STAT1	1		R-HSA-8983835;R-HSA-8950522;R-HSA-8983996;R-HSA-8983983;R-HSA-8984014;R-HSA-8983841;R-HSA-8984963;R-HSA-8984021;R-HSA-8983845;R-HSA-8950453;R-HSA-8984964;R-HSA-8984023
R-HSA-380615	Serotonin clearance from the synaptic cleft	1	16	0.00113034	0.20334	0.347177	0.46	1	3	0.000248	9606	Homo sapiens	MAOB	1		R-HSA-141186
R-HSA-5661231	Metallothioneins bind metals	1	16	0.00113034	0.20334	0.347177	0.46	3	27	0.00222864	9606	Homo sapiens	CES1	1		R-HSA-5662598;R-HSA-5662608;R-HSA-5662986
R-HSA-5668914	Diseases of metabolism	5	220	0.0155422	0.204776	0.347177	0.46	11	114	0.00940982	9606	Homo sapiens	GYS1;MAOB;SI;IDH1;ALDOB	5		R-HSA-5659926;R-HSA-5656438;R-HSA-5659879;R-HSA-5603108;R-HSA-3797226;R-HSA-5659922;R-HSA-3828061;R-HSA-880053;R-HSA-3791349;R-HSA-3814838;R-HSA-5659899
R-HSA-70171	Glycolysis	3	110	0.00777111	0.206428	0.347177	0.46	7	24	0.00198102	9606	Homo sapiens	HK3;GK;ALDOB	3		R-HSA-70420;R-HSA-170810;R-HSA-71496;R-HSA-170824;R-HSA-170825;R-HSA-170799;R-HSA-170796
R-HSA-1236974	ER-Phagosome pathway	4	165	0.0116567	0.208651	0.347177	0.46	7	10	0.000825	9606	Homo sapiens	LOC100513601;TAP2;TAP1;TAPBP	4		R-HSA-8863973;R-HSA-8951595;R-HSA-8863858;R-HSA-1236965;R-HSA-1236949;R-HSA-1236971;R-HSA-8863914
R-HSA-422475	Axon guidance	11	583	0.0411869	0.208815	0.347177	0.46	4	297	0.0245151	9606	Homo sapiens	RPS19;RPS29;RPL23;RPL34;RPL37A;RPL11;MYH14;RPL24;RPL35A	9		R-HSA-3928616;R-HSA-9014652;R-HSA-9014610;R-HSA-419197
R-HSA-1643685	Disease	26	1551	0.109573	0.21286	0.347177	0.46	25	957	0.078993	9606	Homo sapiens	ABCB1;GK;MAOB;STAT1;IDH1;RPL23;RPL34;RPL11;RPL35A;APOA1;ISG15;GYS1;RPS19;RPS29;SI;RPL37A;AP1S1;RPL24;ALDOB;SLC25A5;AP1M2;SLC27A4	22		R-HSA-5659926;R-HSA-192704;R-HSA-5659922;R-HSA-182279;R-HSA-192841;R-HSA-5621918;R-HSA-5678749;R-HSA-182286;R-HSA-3791349;R-HSA-3814838;R-HSA-3797226;R-HSA-1888198;R-HSA-5656438;R-HSA-5627891;R-HSA-3828061;R-HSA-5682111;R-HSA-1176059;R-HSA-180905;R-HSA-168878;R-HSA-5659899;R-HSA-5659879;R-HSA-5603108;R-HSA-5661474;R-HSA-182263;R-HSA-880053
R-HSA-918233	TRAF3-dependent IRF activation pathway	1	17	0.00120099	0.214586	0.347177	0.46	4	9	0.000743	9606	Homo sapiens	DDX58	1		R-HSA-918232;R-HSA-918229;R-HSA-918227;R-HSA-918225
R-HSA-2187338	Visual phototransduction	4	168	0.0118686	0.217501	0.347177	0.46	9	90	0.00742881	9606	Homo sapiens	APOC3;APOA1;APOA4;APOE	4		R-HSA-2395764;R-HSA-2187332;R-HSA-2404131;R-HSA-2404140;R-HSA-2424254;R-HSA-2395768;R-HSA-2395784;R-HSA-2423785;R-HSA-2429643
R-HSA-72649	Translation initiation complex formation	2	62	0.00438008	0.220256	0.347177	0.46	2	2	0.000165	9606	Homo sapiens	RPS19;RPS29	2		R-HSA-156808;R-HSA-157849
R-HSA-8935690	Digestion	2	63	0.00445072	0.225454	0.347177	0.46	7	24	0.00198102	9606	Homo sapiens	SI	1		R-HSA-5659861;R-HSA-191108;R-HSA-189102;R-HSA-191116;R-HSA-191101;R-HSA-189053;R-HSA-189069
R-HSA-8963896	HDL assembly	1	18	0.00127163	0.225673	0.347177	0.46	6	9	0.000743	9606	Homo sapiens	APOA1	1		R-HSA-216723;R-HSA-264758;R-HSA-216727;R-HSA-216757;R-HSA-216756;R-HSA-349657
R-HSA-804914	Transport of fatty acids	1	18	0.00127163	0.225673	0.347177	0.46	1	2	0.000165	9606	Homo sapiens	SLC27A4	1		R-HSA-879585
R-HSA-111471	Apoptotic factor-mediated response	1	18	0.00127163	0.225673	0.347177	0.46	4	26	0.0021461	9606	Homo sapiens	CASP3	1		R-HSA-114419;R-HSA-9627104;R-HSA-114306;R-HSA-114252
R-HSA-72702	Ribosomal scanning and start codon recognition	2	64	0.00452137	0.230661	0.347177	0.46	2	2	0.000165	9606	Homo sapiens	RPS19;RPS29	2		R-HSA-72697;R-HSA-72621
R-HSA-72662	Activation of the mRNA upon binding of the cap-binding complex and eIFs, and subsequent binding to 43S	2	66	0.00466266	0.241098	0.347177	0.46	2	6	0.000495	9606	Homo sapiens	RPS19;RPS29	2		R-HSA-156808;R-HSA-157849
R-HSA-156590	Glutathione conjugation	2	67	0.00473331	0.246325	0.347177	0.46	2	14	0.00115559	9606	Homo sapiens	GSTK1;CNDP2	2		R-HSA-3301943;R-HSA-1247910
R-HSA-9603798	Class I peroxisomal membrane protein import	1	20	0.00141293	0.247383	0.347177	0.46	6	6	0.000495	9606	Homo sapiens	PEX19	1		R-HSA-9603797;R-HSA-9603784;R-HSA-9603801;R-HSA-9603775;R-HSA-9603791;R-HSA-9603804
R-HSA-70350	Fructose catabolism	1	20	0.00141293	0.247383	0.347177	0.46	1	5	0.000413	9606	Homo sapiens	ALDOB	1		R-HSA-70342
R-HSA-168643	Nucleotide-binding domain, leucine rich repeat containing receptor (NLR) signaling pathways	2	69	0.0048746	0.25679	0.347177	0.46	7	45	0.0037144	9606	Homo sapiens	ASC;CASP1	2		R-HSA-844620;R-HSA-844617;R-HSA-844618;R-HSA-844612;R-HSA-877361;R-HSA-622420;R-HSA-844610
R-HSA-3000471	Scavenging by Class B Receptors	1	21	0.00148357	0.25801	0.347177	0.46	3	5	0.000413	9606	Homo sapiens	APOA1	1		R-HSA-2187264;R-HSA-2247512;R-HSA-2197646
R-HSA-964975	Vitamins B6 activation to pyridoxal phosphate	1	21	0.00148357	0.25801	0.347177	0.46	3	6	0.000495	9606	Homo sapiens	PDXK	1		R-HSA-964958;R-HSA-964970;R-HSA-964962
R-HSA-5661270	Formation of xylulose-5-phosphate	1	21	0.00148357	0.25801	0.347177	0.46	1	6	0.000495	9606	Homo sapiens	CRYL1	1		R-HSA-5661290
R-HSA-5660526	Response to metal ions	1	21	0.00148357	0.25801	0.347177	0.46	3	31	0.00255881	9606	Homo sapiens	CES1	1		R-HSA-5662598;R-HSA-5662608;R-HSA-5662986
R-HSA-2426168	Activation of gene expression by SREBF (SREBP)	2	70	0.00494525	0.262026	0.347177	0.46	2	42	0.00346678	9606	Homo sapiens	LSS	1		R-HSA-1655828;R-HSA-2426154
R-HSA-8963743	Digestion and absorption	2	71	0.0050159	0.267263	0.347177	0.46	7	30	0.00247627	9606	Homo sapiens	SI	1		R-HSA-5659861;R-HSA-191108;R-HSA-189102;R-HSA-191116;R-HSA-191101;R-HSA-189053;R-HSA-189069
R-HSA-3229121	Glycogen storage diseases	1	22	0.00155422	0.268488	0.347177	0.46	4	10	0.000825	9606	Homo sapiens	GYS1	1		R-HSA-3797226;R-HSA-3828061;R-HSA-3791349;R-HSA-3814838
R-HSA-2028269	Signaling by Hippo	1	22	0.00155422	0.268488	0.347177	0.46	2	30	0.00247627	9606	Homo sapiens	CASP3	1		R-HSA-2028697;R-HSA-2028692
R-HSA-1236975	Antigen processing-Cross presentation	4	187	0.0132109	0.27559	0.347177	0.46	10	23	0.00189847	9606	Homo sapiens	LOC100513601;TAP2;TAP1;TAPBP	4		R-HSA-8863973;R-HSA-8951595;R-HSA-8863858;R-HSA-1236964;R-HSA-1236965;R-HSA-1236949;R-HSA-1236954;R-HSA-1236971;R-HSA-8863914;R-HSA-1236943
R-HSA-163210	Formation of ATP by chemiosmotic coupling	1	23	0.00162487	0.278818	0.347177	0.46	3	3	0.000248	9606	Homo sapiens	ATP5PF	1		R-HSA-164834;R-HSA-164832;R-HSA-164840
R-HSA-418217	G beta:gamma signalling through PLC beta	1	23	0.00162487	0.278818	0.347177	0.46	2	2	0.000165	9606	Homo sapiens	PLCB3	1		R-HSA-398193;R-HSA-398040
R-HSA-500657	Presynaptic function of Kainate receptors	1	23	0.00162487	0.278818	0.347177	0.46	1	2	0.000165	9606	Homo sapiens	PLCB3	1		R-HSA-500717
R-HSA-5625900	RHO GTPases activate CIT	1	23	0.00162487	0.278818	0.347177	0.46	1	6	0.000495	9606	Homo sapiens	MYH14	1		R-HSA-5671919
R-HSA-5627117	RHO GTPases Activate ROCKs	1	24	0.00169551	0.289003	0.347177	0.46	2	6	0.000495	9606	Homo sapiens	MYH14	1		R-HSA-419232;R-HSA-419197
R-HSA-416572	Sema4D induced cell migration and growth-cone collapse	1	24	0.00169551	0.289003	0.347177	0.46	1	6	0.000495	9606	Homo sapiens	MYH14	1		R-HSA-419197
R-HSA-77111	Synthesis of Ketone Bodies	1	24	0.00169551	0.289003	0.347177	0.46	1	8	0.00066	9606	Homo sapiens	HMGCL	1		R-HSA-74180
R-HSA-71288	Creatine metabolism	1	25	0.00176616	0.299045	0.347177	0.46	1	6	0.000495	9606	Homo sapiens	CKMT1A	1		R-HSA-200326
R-HSA-196854	Metabolism of vitamins and cofactors	7	382	0.0269869	0.300878	0.347177	0.46	15	201	0.016591	9606	Homo sapiens	NAPRT1;PDXK;IDH1;APOC3;APOA1;APOA4;APOE	7		R-HSA-389540;R-HSA-197186;R-HSA-964970;R-HSA-2187332;R-HSA-2404131;R-HSA-2404140;R-HSA-389550;R-HSA-2395784;R-HSA-964962;R-HSA-2423785;R-HSA-2429643;R-HSA-964958;R-HSA-2395764;R-HSA-2424254;R-HSA-2395768
R-HSA-3322077	Glycogen synthesis	1	26	0.00183681	0.308946	0.347177	0.46	11	23	0.00189847	9606	Homo sapiens	GYS1	1		R-HSA-3781001;R-HSA-3322003;R-HSA-3322001;R-HSA-3781018;R-HSA-3781023;R-HSA-3322005;R-HSA-3781009;R-HSA-3781024;R-HSA-3322041;R-HSA-3322057;R-HSA-3322025
R-HSA-428930	Thromboxane signalling through TP receptor	1	26	0.00183681	0.308946	0.347177	0.46	3	7	0.000578	9606	Homo sapiens	GNAQ	1		R-HSA-428752;R-HSA-428750;R-HSA-428749
R-HSA-174403	Glutathione synthesis and recycling	1	26	0.00183681	0.308946	0.347177	0.46	1	9	0.000743	9606	Homo sapiens	CNDP2	1		R-HSA-1247910
R-HSA-1839117	Signaling by cytosolic FGFR1 fusion mutants	1	26	0.00183681	0.308946	0.347177	0.46	1	14	0.00115559	9606	Homo sapiens	STAT1	1		R-HSA-1888198
R-HSA-449836	Other interleukin signaling	1	26	0.00183681	0.308946	0.347177	0.46	1	19	0.0015683	9606	Homo sapiens	CASP3	1		R-HSA-449073
R-HSA-162906	HIV Infection	5	262	0.0185094	0.316205	0.347177	0.46	4	158	0.0130417	9606	Homo sapiens	AP1S1;SLC25A5;AP1M2	3		R-HSA-182263;R-HSA-182279;R-HSA-180905;R-HSA-182286
R-HSA-5627123	RHO GTPases activate PAKs	1	27	0.00190745	0.318708	0.347177	0.46	3	15	0.00123814	9606	Homo sapiens	MYH14	1		R-HSA-5668932;R-HSA-5668978;R-HSA-419232
R-HSA-5652084	Fructose metabolism	1	27	0.00190745	0.318708	0.347177	0.46	1	7	0.000578	9606	Homo sapiens	ALDOB	1		R-HSA-70342
R-HSA-71384	Ethanol oxidation	1	28	0.0019781	0.328332	0.347177	0.46	1	8	0.00066	9606	Homo sapiens	ALDH1B1	1		R-HSA-5696091
R-HSA-74182	Ketone body metabolism	1	28	0.0019781	0.328332	0.347177	0.46	1	11	0.000908	9606	Homo sapiens	HMGCL	1		R-HSA-74180
R-HSA-70614	Amino acid synthesis and interconversion (transamination)	2	83	0.00586365	0.329812	0.347177	0.46	3	35	0.00288898	9606	Homo sapiens	OAT;ASNS	2		R-HSA-70599;R-HSA-70666;R-HSA-70654
R-HSA-5633008	TP53 Regulates Transcription of Cell Death Genes	2	83	0.00586365	0.329812	0.347177	0.46	2	68	0.00561288	9606	Homo sapiens	CASP1	1		R-HSA-6798082;R-HSA-6798081
R-HSA-168249	Innate Immune System	21	1324	0.0935359	0.330439	0.347177	0.46	55	685	0.0565415	9606	Homo sapiens	CFD;NAPRT1;AOC1;PDXK;MME;DDX58;IDH1;RNASET2;HP;WAS;ISG15;ITGAL;OLFM4;ALAD;ASC;HK3;SI;ANPEP;TOLLIP;DHX58;CASP1	21		R-HSA-936462;R-HSA-2029466;R-HSA-6799350;R-HSA-933532;R-HSA-933530;R-HSA-936475;R-HSA-933528;R-HSA-933526;R-HSA-933527;R-HSA-2197691;R-HSA-933525;R-HSA-2197690;R-HSA-933523;R-HSA-5660662;R-HSA-5660663;R-HSA-933538;R-HSA-933539;R-HSA-933537;R-HSA-990526;R-HSA-936381;R-HSA-173745;R-HSA-936378;R-HSA-877361;R-HSA-844620;R-HSA-844617;R-HSA-844618;R-HSA-936390;R-HSA-844612;R-HSA-6800426;R-HSA-844610;R-…
R-HSA-163685	Integration of energy metabolism	3	144	0.0101731	0.335505	0.347177	0.46	6	62	0.00511762	9606	Homo sapiens	PLCB3;GNAQ;ACSL3	3		R-HSA-400023;R-HSA-416530;R-HSA-399998;R-HSA-434382;R-HSA-400027;R-HSA-399995
R-HSA-418592	ADP signalling through P2Y purinoceptor 1	1	29	0.00204875	0.337822	0.347177	0.46	4	7	0.000578	9606	Homo sapiens	GNAQ	1		R-HSA-418581;R-HSA-418579;R-HSA-418576;R-HSA-428941
R-HSA-933542	TRAF6 mediated NF-kB activation	1	29	0.00204875	0.337822	0.347177	0.46	2	4	0.00033	9606	Homo sapiens	DDX58	1		R-HSA-933530;R-HSA-933528
R-HSA-8854691	Interleukin-20 family signaling	1	29	0.00204875	0.337822	0.347177	0.46	11	56	0.00462237	9606	Homo sapiens	STAT1	1		R-HSA-8987097;R-HSA-8986985;R-HSA-8987033;R-HSA-8987080;R-HSA-8987007;R-HSA-8987150;R-HSA-8987230;R-HSA-8987266;R-HSA-8987218;R-HSA-8987255;R-HSA-8987270
R-HSA-982772	Growth hormone receptor signaling	1	29	0.00204875	0.337822	0.347177	0.46	2	28	0.00231118	9606	Homo sapiens	STAT1	1		R-HSA-1168768;R-HSA-1168767
R-HSA-1655829	Regulation of cholesterol biosynthesis by SREBP (SREBF)	2	86	0.00607559	0.345261	0.347177	0.46	2	52	0.0042922	9606	Homo sapiens	LSS	1		R-HSA-1655828;R-HSA-2426154
R-HSA-181430	Norepinephrine Neurotransmitter Release Cycle	1	30	0.00211939	0.347177	0.347177	0.46	1	6	0.000495	9606	Homo sapiens	MAOB	1		R-HSA-374909
R-HSA-400685	Sema4D in semaphorin signaling	1	30	0.00211939	0.347177	0.347177	0.46	1	12	0.000991	9606	Homo sapiens	MYH14	1		R-HSA-419197
R-HSA-977225	Amyloid fiber formation	2	88	0.00621688	0.355497	0.355497	0.45	2	33	0.0027239	9606	Homo sapiens	APOA1;APOA4	2		R-HSA-976734;R-HSA-977136
R-HSA-8949613	Cristae formation	1	31	0.00219004	0.356402	0.356402	0.45	1	2	0.000165	9606	Homo sapiens	ATP5PF	1		R-HSA-8949580
R-HSA-5357769	Caspase activation via extrinsic apoptotic signalling pathway	1	32	0.00226069	0.365496	0.365496	0.44	4	17	0.00140322	9606	Homo sapiens	CASP3	1		R-HSA-418852;R-HSA-418846;R-HSA-418845;R-HSA-373705
R-HSA-110373	Resolution of AP sites via the multiple-nucleotide patch replacement pathway	1	32	0.00226069	0.365496	0.365496	0.44	1	19	0.0015683	9606	Homo sapiens	ADPRHL2	1		R-HSA-8952903
R-HSA-390918	Peroxisomal lipid metabolism	2	90	0.00635818	0.365676	0.365676	0.44	3	35	0.00288898	9606	Homo sapiens	ACOX1;EHHADH	2		R-HSA-390256;R-HSA-6809264;R-HSA-6809263
R-HSA-3928663	EPHA-mediated growth cone collapse	1	33	0.00233133	0.374463	0.374463	0.43	1	4	0.00033	9606	Homo sapiens	MYH14	1		R-HSA-3928616
R-HSA-451326	Activation of kainate receptors upon glutamate binding	1	34	0.00240198	0.383304	0.383304	0.42	1	6	0.000495	9606	Homo sapiens	PLCB3	1		R-HSA-500717
R-HSA-73614	Pyrimidine salvage	1	34	0.00240198	0.383304	0.383304	0.42	1	10	0.000825	9606	Homo sapiens	UPP1	1		R-HSA-74372
R-HSA-2161522	Abacavir transport and metabolism	1	34	0.00240198	0.383304	0.383304	0.42	1	10	0.000825	9606	Homo sapiens	ABCB1	1		R-HSA-2161538
R-HSA-5653656	Vesicle-mediated transport	13	824	0.0582126	0.388779	0.388779	0.41	59	251	0.0207181	9606	Homo sapiens	TBC1D1;TFRC;GPS1;MYO6;HP;PLIN3;AP1S1;APOA1;APOE;AP1M2;NAPG;ARFGAP2	12		R-HSA-1445143;R-HSA-5694423;R-HSA-8868230;R-HSA-8868236;R-HSA-5694425;R-HSA-8847638;R-HSA-2168883;R-HSA-8847637;R-HSA-2168885;R-HSA-2168889;R-HSA-8871194;R-HSA-8871193;R-HSA-2187264;R-HSA-6807877;R-HSA-6807875;R-HSA-6814670;R-HSA-8867756;R-HSA-8868651;R-HSA-8867754;R-HSA-8868648;R-HSA-2197646;R-HSA-6814678;R-HSA-8868661;R-HSA-6814676;R-HSA-8868660;R-HSA-8868659;R-HSA-6814675;R-HSA-8868658;R-HSA-1…
R-HSA-5656169	Termination of translesion DNA synthesis	1	35	0.00247262	0.39202	0.39202	0.41	5	9	0.000743	9606	Homo sapiens	ISG15	1		R-HSA-5653766;R-HSA-5653780;R-HSA-5653786;R-HSA-5653754;R-HSA-5653770
R-HSA-456926	Thrombin signalling through proteinase activated receptors (PARs)	1	35	0.00247262	0.39202	0.39202	0.41	3	14	0.00115559	9606	Homo sapiens	GNAQ	1		R-HSA-396996;R-HSA-397835;R-HSA-114558
R-HSA-210745	Regulation of gene expression in beta cells	1	35	0.00247262	0.39202	0.39202	0.41	1	12	0.000991	9606	Homo sapiens	GK	1		R-HSA-211346
R-HSA-5619107	Defective TPR may confer susceptibility towards thyroid papillary carcinoma (TPC)	1	36	0.00254327	0.400613	0.400613	0.4	1	1	8.25e-05	9606	Homo sapiens	GK	1		R-HSA-5661474
R-HSA-9008059	Interleukin-37 signaling	1	36	0.00254327	0.400613	0.400613	0.4	3	14	0.00115559	9606	Homo sapiens	CASP1	1		R-HSA-9012556;R-HSA-9012542;R-HSA-9012689
R-HSA-9013508	NOTCH3 Intracellular Domain Regulates Transcription	1	36	0.00254327	0.400613	0.400613	0.4	4	22	0.00181593	9606	Homo sapiens	STAT1	1		R-HSA-9021325;R-HSA-9013567;R-HSA-9014129;R-HSA-9021334
R-HSA-186763	Downstream signal transduction	1	36	0.00254327	0.400613	0.400613	0.4	1	16	0.00132068	9606	Homo sapiens	STAT1	1		R-HSA-380782
R-HSA-399719	Trafficking of AMPA receptors	1	37	0.00261392	0.409086	0.409086	0.39	1	4	0.00033	9606	Homo sapiens	MYO6	1		R-HSA-416320
R-HSA-159418	Recycling of bile acids and salts	1	37	0.00261392	0.409086	0.409086	0.39	2	12	0.000991	9606	Homo sapiens	FABP6	1		R-HSA-194187;R-HSA-194153
R-HSA-5619084	ABC transporter disorders	2	99	0.006994	0.410656	0.410656	0.39	2	22	0.00181593	9606	Homo sapiens	ABCB1;APOA1	2		R-HSA-5682111;R-HSA-5678749
R-HSA-111465	Apoptotic cleavage of cellular proteins	1	38	0.00268456	0.41744	0.41744	0.38	27	38	0.00313661	9606	Homo sapiens	CASP3	1		R-HSA-351877;R-HSA-201603;R-HSA-202947;R-HSA-351876;R-HSA-201611;R-HSA-201608;R-HSA-212552;R-HSA-202960;R-HSA-202967;R-HSA-201622;R-HSA-202966;R-HSA-351901;R-HSA-202969;R-HSA-201631;R-HSA-201630;R-HSA-201629;R-HSA-201628;R-HSA-201639;R-HSA-202917;R-HSA-201636;R-HSA-201640;R-HSA-351913;R-HSA-351849;R-HSA-201595;R-HSA-202939;R-HSA-351871;R-HSA-350651
R-HSA-76002	Platelet activation, signaling and aggregation	5	299	0.0211233	0.419568	0.419568	0.38	13	114	0.00940982	9606	Homo sapiens	CFD;ITIH4;ITIH3;GNAQ;APOA1	5		R-HSA-396996;R-HSA-428750;R-HSA-481007;R-HSA-428749;R-HSA-428941;R-HSA-397835;R-HSA-418581;R-HSA-418579;R-HSA-482770;R-HSA-481009;R-HSA-428752;R-HSA-418576;R-HSA-114558
R-HSA-2173782	Binding and Uptake of Ligands by Scavenger Receptors	3	167	0.011798	0.423376	0.423376	0.37	9	33	0.0027239	9606	Homo sapiens	HP;APOA1;APOE	3		R-HSA-2187264;R-HSA-2168883;R-HSA-2173778;R-HSA-2168885;R-HSA-2230938;R-HSA-2507854;R-HSA-2168889;R-HSA-2247512;R-HSA-2197646
R-HSA-917977	Transferrin endocytosis and recycling	1	39	0.00275521	0.425676	0.425676	0.37	6	11	0.000908	9606	Homo sapiens	TFRC	1		R-HSA-917807;R-HSA-917839;R-HSA-5691154;R-HSA-917835;R-HSA-917814;R-HSA-917987
R-HSA-397795	G-protein beta:gamma signalling	1	39	0.00275521	0.425676	0.425676	0.37	2	15	0.00123814	9606	Homo sapiens	PLCB3	1		R-HSA-398193;R-HSA-398040
R-HSA-189451	Heme biosynthesis	1	39	0.00275521	0.425676	0.425676	0.37	2	16	0.00132068	9606	Homo sapiens	ALAD	1		R-HSA-189439;R-HSA-190141
R-HSA-399721	Glutamate binding, activation of AMPA receptors and synaptic plasticity	1	39	0.00275521	0.425676	0.425676	0.37	1	9	0.000743	9606	Homo sapiens	MYO6	1		R-HSA-416320
R-HSA-1855204	Synthesis of IP3 and IP4 in the cytosol	1	39	0.00275521	0.425676	0.425676	0.37	1	12	0.000991	9606	Homo sapiens	PLCB3	1		R-HSA-1855177
R-HSA-168638	NOD1/2 Signaling Pathway	1	39	0.00275521	0.425676	0.425676	0.37	1	17	0.00140322	9606	Homo sapiens	CASP1	1		R-HSA-622420
R-HSA-170822	Regulation of Glucokinase by Glucokinase Regulatory Protein	1	40	0.00282586	0.433796	0.433796	0.36	5	5	0.000413	9606	Homo sapiens	GK	1		R-HSA-170810;R-HSA-170824;R-HSA-170825;R-HSA-170799;R-HSA-170796
R-HSA-5696394	DNA Damage Recognition in GG-NER	1	40	0.00282586	0.433796	0.433796	0.36	1	5	0.000413	9606	Homo sapiens	GPS1	1		R-HSA-5691006
R-HSA-5663213	RHO GTPases Activate WASPs and WAVEs	1	41	0.0028965	0.441802	0.441802	0.35	6	10	0.000825	9606	Homo sapiens	WAS	1		R-HSA-2197698;R-HSA-2029466;R-HSA-442592;R-HSA-2197691;R-HSA-2197690;R-HSA-442586
R-HSA-2168880	Scavenging of heme from plasma	2	106	0.00748852	0.444545	0.444545	0.35	4	12	0.000991	9606	Homo sapiens	HP;APOA1	2		R-HSA-2168883;R-HSA-2168885;R-HSA-2230938;R-HSA-2168889
R-HSA-6811434	COPI-dependent Golgi-to-ER retrograde traffic	2	107	0.00755917	0.449299	0.449299	0.35	4	11	0.000908	9606	Homo sapiens	NAPG;ARFGAP2	2		R-HSA-6811425;R-HSA-6811422;R-HSA-6811418;R-HSA-6811417
R-HSA-6807878	COPI-mediated anterograde transport	2	107	0.00755917	0.449299	0.449299	0.35	4	12	0.000991	9606	Homo sapiens	NAPG;ARFGAP2	2		R-HSA-6809015;R-HSA-6809014;R-HSA-6807877;R-HSA-6807875
R-HSA-202430	Translocation of ZAP-70 to Immunological synapse	1	42	0.00296715	0.449696	0.449696	0.35	4	4	0.00033	9606	Homo sapiens	SLA-DQA1	1		R-HSA-8855381;R-HSA-202168;R-HSA-202344;R-HSA-202174
R-HSA-392518	Signal amplification	1	42	0.00296715	0.449696	0.449696	0.35	7	18	0.00148576	9606	Homo sapiens	GNAQ	1		R-HSA-418581;R-HSA-418579;R-HSA-428752;R-HSA-418576;R-HSA-428750;R-HSA-428749;R-HSA-428941
R-HSA-933541	TRAF6 mediated IRF7 activation	1	43	0.0030378	0.457478	0.457478	0.34	5	11	0.000908	9606	Homo sapiens	DDX58	1		R-HSA-918230;R-HSA-933527;R-HSA-933525;R-HSA-933538;R-HSA-933537
R-HSA-8982491	Glycogen metabolism	1	43	0.0030378	0.457478	0.457478	0.34	11	38	0.00313661	9606	Homo sapiens	GYS1	1		R-HSA-3781001;R-HSA-3322003;R-HSA-3322001;R-HSA-3781018;R-HSA-3781023;R-HSA-3322005;R-HSA-3781009;R-HSA-3781024;R-HSA-3322041;R-HSA-3322057;R-HSA-3322025
R-HSA-5689896	Ovarian tumor domain proteases	1	43	0.0030378	0.457478	0.457478	0.34	1	14	0.00115559	9606	Homo sapiens	DDX58	1		R-HSA-936381
R-HSA-8957275	Post-translational protein phosphorylation	2	109	0.00770046	0.458738	0.458738	0.34	1	1	8.25e-05	9606	Homo sapiens	APOA1;APOE	2		R-HSA-8952289
R-HSA-199991	Membrane Trafficking	10	665	0.0469799	0.472129	0.472129	0.33	50	218	0.0179942	9606	Homo sapiens	TBC1D1;TFRC;GPS1;MYO6;PLIN3;AP1S1;AP1M2;NAPG;ARFGAP2	9		R-HSA-1445143;R-HSA-5694423;R-HSA-8868230;R-HSA-8868236;R-HSA-5694425;R-HSA-8847638;R-HSA-8847637;R-HSA-8871194;R-HSA-8871193;R-HSA-6807877;R-HSA-6807875;R-HSA-6814670;R-HSA-8867756;R-HSA-8868651;R-HSA-8867754;R-HSA-8868648;R-HSA-6814678;R-HSA-8868661;R-HSA-6814676;R-HSA-8868660;R-HSA-8868659;R-HSA-6814675;R-HSA-8868658;R-HSA-190519;R-HSA-432688;R-HSA-8869438;R-HSA-6814684;R-HSA-6814683;R-HSA-421…
R-HSA-202427	Phosphorylation of CD3 and TCR zeta chains	1	45	0.00317909	0.472715	0.472715	0.33	5	7	0.000578	9606	Homo sapiens	SLA-DQA1	1		R-HSA-202291;R-HSA-202214;R-HSA-202165;R-HSA-202233;R-HSA-8852200
R-HSA-389948	PD-1 signaling	1	45	0.00317909	0.472715	0.472715	0.33	1	4	0.00033	9606	Homo sapiens	SLA-DQA1	1		R-HSA-389758
R-HSA-2046106	alpha-linolenic acid (ALA) metabolism	1	45	0.00317909	0.472715	0.472715	0.33	1	15	0.00123814	9606	Homo sapiens	ACOX1	1		R-HSA-2066787
R-HSA-71387	Metabolism of carbohydrates	7	458	0.0323561	0.475339	0.475339	0.32	23	242	0.0199752	9606	Homo sapiens	HK3;GYS1;GK;CRYL1;ALDOB;FBP1;PCK2	7		R-HSA-3322003;R-HSA-3322001;R-HSA-3781018;R-HSA-71495;R-HSA-3781023;R-HSA-70342;R-HSA-3322005;R-HSA-3781009;R-HSA-71496;R-HSA-170824;R-HSA-170825;R-HSA-3322041;R-HSA-170799;R-HSA-70479;R-HSA-170796;R-HSA-3781001;R-HSA-70420;R-HSA-372819;R-HSA-170810;R-HSA-3781024;R-HSA-3322057;R-HSA-3322025;R-HSA-5661290
R-HSA-168276	NS1 Mediated Effects on Host Pathways	1	46	0.00324974	0.480174	0.480174	0.32	1	6	0.000495	9606	Homo sapiens	ISG15	1		R-HSA-1176059
R-HSA-8856825	Cargo recognition for clathrin-mediated endocytosis	2	115	0.00812434	0.486484	0.486484	0.31	3	14	0.00115559	9606	Homo sapiens	TFRC;GPS1	2		R-HSA-8866277;R-HSA-8863723;R-HSA-8863721
R-HSA-451927	Interleukin-2 family signaling	1	47	0.00332038	0.487527	0.487527	0.31	8	58	0.00478745	9606	Homo sapiens	STAT1	1		R-HSA-8985929;R-HSA-9006873;R-HSA-8985981;R-HSA-8985900;R-HSA-8985966;R-HSA-8985988;R-HSA-8985943;R-HSA-9006870
R-HSA-983169	Class I MHC mediated antigen processing & presentation	7	465	0.0328506	0.491195	0.491195	0.31	29	48	0.00396203	9606	Homo sapiens	LOC100513601;ERAP2;ERAP1;TAP2;TAP1;TAPBP;HERC6	7		R-HSA-8951499;R-HSA-1236949;R-HSA-1236954;R-HSA-983427;R-HSA-983426;R-HSA-983425;R-HSA-983424;R-HSA-1236943;R-HSA-8863973;R-HSA-8951595;R-HSA-983148;R-HSA-983147;R-HSA-983146;R-HSA-983145;R-HSA-983144;R-HSA-983142;R-HSA-983140;R-HSA-8863914;R-HSA-983138;R-HSA-983422;R-HSA-983421;R-HSA-8863858;R-HSA-983161;R-HSA-1236964;R-HSA-1236965;R-HSA-983158;R-HSA-1236971;R-HSA-983157;R-HSA-983156
R-HSA-6811438	Intra-Golgi traffic	1	48	0.00339103	0.494777	0.494777	0.31	2	10	0.000825	9606	Homo sapiens	NAPG	1		R-HSA-8847638;R-HSA-8847637
R-HSA-110313	Translesion synthesis by Y family DNA polymerases bypasses lesions on DNA template	1	48	0.00339103	0.494777	0.494777	0.31	5	28	0.00231118	9606	Homo sapiens	ISG15	1		R-HSA-5653766;R-HSA-5653780;R-HSA-5653786;R-HSA-5653754;R-HSA-5653770
R-HSA-1839124	FGFR1 mutant receptor activation	1	48	0.00339103	0.494777	0.494777	0.31	1	25	0.00206356	9606	Homo sapiens	STAT1	1		R-HSA-1888198
R-HSA-73933	Resolution of Abasic Sites (AP sites)	1	48	0.00339103	0.494777	0.494777	0.31	1	43	0.00354932	9606	Homo sapiens	ADPRHL2	1		R-HSA-8952903
R-HSA-156580	Phase II - Conjugation of compounds	4	258	0.0182268	0.499502	0.499502	0.3	4	72	0.00594305	9606	Homo sapiens	GSTK1;BPNT1;COMT;CNDP2	4		R-HSA-3301943;R-HSA-1247910;R-HSA-176606;R-HSA-175983
R-HSA-8878159	Transcriptional regulation by RUNX3	2	118	0.00833628	0.500023	0.500023	0.3	2	47	0.00387949	9606	Homo sapiens	ITGAL	1		R-HSA-8949343;R-HSA-8949335
R-HSA-9615017	FOXO-mediated transcription of oxidative stress, metabolic and neuronal genes	1	49	0.00346167	0.501925	0.501925	0.3	1	34	0.00280644	9606	Homo sapiens	GK	1		R-HSA-9625124
R-HSA-2672351	Stimuli-sensing channels	2	120	0.00847757	0.508922	0.508922	0.29	4	24	0.00198102	9606	Homo sapiens	CLCA1;CLCA4	2		R-HSA-2744361;R-HSA-5333671;R-HSA-2744242;R-HSA-2684901
R-HSA-71403	Citric acid cycle (TCA cycle)	1	50	0.00353232	0.508972	0.508972	0.29	1	17	0.00140322	9606	Homo sapiens	IDH1	1		R-HSA-70967
R-HSA-379716	Cytosolic tRNA aminoacylation	1	50	0.00353232	0.508972	0.508972	0.29	1	21	0.00173339	9606	Homo sapiens	WARS	1		R-HSA-379977
R-HSA-75876	Synthesis of very long-chain fatty acyl-CoAs	1	51	0.00360297	0.51592	0.51592	0.29	2	12	0.000991	9606	Homo sapiens	ACSL3	1		R-HSA-548843;R-HSA-201035
R-HSA-73621	Pyrimidine catabolism	1	51	0.00360297	0.51592	0.51592	0.29	1	17	0.00140322	9606	Homo sapiens	UPP1	1		R-HSA-74376
R-HSA-190828	Gap junction trafficking	1	52	0.00367361	0.52277	0.52277	0.28	2	20	0.00165085	9606	Homo sapiens	MYO6	1		R-HSA-190519;R-HSA-190829
R-HSA-156581	Methylation	1	52	0.00367361	0.52277	0.52277	0.28	1	13	0.00107305	9606	Homo sapiens	COMT	1		R-HSA-175983
R-HSA-189445	Metabolism of porphyrins	1	53	0.00374426	0.529523	0.529523	0.28	2	21	0.00173339	9606	Homo sapiens	ALAD	1		R-HSA-189439;R-HSA-190141
R-HSA-75153	Apoptotic execution phase	1	54	0.00381491	0.536182	0.536182	0.27	31	57	0.00470491	9606	Homo sapiens	CASP3	1		R-HSA-351877;R-HSA-201603;R-HSA-202947;R-HSA-211651;R-HSA-351876;R-HSA-201611;R-HSA-201608;R-HSA-212552;R-HSA-211219;R-HSA-202960;R-HSA-202967;R-HSA-201622;R-HSA-202966;R-HSA-351901;R-HSA-202969;R-HSA-201631;R-HSA-201630;R-HSA-201629;R-HSA-201628;R-HSA-201639;R-HSA-202917;R-HSA-201636;R-HSA-201640;R-HSA-351913;R-HSA-351849;R-HSA-211186;R-HSA-211190;R-HSA-201595;R-HSA-202939;R-HSA-351871;R-HSA-350…
R-HSA-381426	Regulation of Insulin-like Growth Factor (IGF) transport and uptake by Insulin-like Growth Factor Binding Proteins (IGFBPs)	2	127	0.00897209	0.539247	0.539247	0.27	1	14	0.00115559	9606	Homo sapiens	APOA1;APOE	2		R-HSA-8952289
R-HSA-2046104	alpha-linolenic (omega3) and linoleic (omega6) acid metabolism	1	55	0.00388555	0.542747	0.542747	0.27	1	25	0.00206356	9606	Homo sapiens	ACOX1	1		R-HSA-2066787
R-HSA-6781823	Formation of TC-NER Pre-Incision Complex	1	56	0.0039562	0.549219	0.549219	0.26	1	7	0.000578	9606	Homo sapiens	GPS1	1		R-HSA-6781833
R-HSA-157858	Gap junction trafficking and regulation	1	56	0.0039562	0.549219	0.549219	0.26	2	24	0.00198102	9606	Homo sapiens	MYO6	1		R-HSA-190519;R-HSA-190829
R-HSA-5655302	Signaling by FGFR1 in disease	1	57	0.00402685	0.5556	0.5556	0.26	1	35	0.00288898	9606	Homo sapiens	STAT1	1		R-HSA-1888198
R-HSA-8953854	Metabolism of RNA	11	782	0.0552455	0.556233	0.556233	0.25	8	187	0.0154354	9606	Homo sapiens	RPS19;RPS29;RPL23;RPL34;RPL37A;RPL11;RPL24;RPL35A;THUMPD1	9		R-HSA-6791223;R-HSA-927836;R-HSA-927789;R-HSA-6791218;R-HSA-927832;R-HSA-927813;R-HSA-6790987;R-HSA-927889
R-HSA-73893	DNA Damage Bypass	1	58	0.00409749	0.561891	0.561891	0.25	5	34	0.00280644	9606	Homo sapiens	ISG15	1		R-HSA-5653766;R-HSA-5653780;R-HSA-5653786;R-HSA-5653754;R-HSA-5653770
R-HSA-5619115	Disorders of transmembrane transporters	4	281	0.0198516	0.566555	0.566555	0.25	5	88	0.00726372	9606	Homo sapiens	ABCB1;GK;APOA1;SLC27A4	4		R-HSA-5661474;R-HSA-5627891;R-HSA-5682111;R-HSA-5621918;R-HSA-5678749
R-HSA-197264	Nicotinamide salvaging	1	59	0.00416814	0.568094	0.568094	0.25	1	12	0.000991	9606	Homo sapiens	NAPRT1	1		R-HSA-197186
R-HSA-109606	Intrinsic Pathway for Apoptosis	1	59	0.00416814	0.568094	0.568094	0.25	4	60	0.00495254	9606	Homo sapiens	CASP3	1		R-HSA-114419;R-HSA-9627104;R-HSA-114306;R-HSA-114252
R-HSA-6785807	Interleukin-4 and Interleukin-13 signaling	3	211	0.0149064	0.577633	0.577633	0.24	7	46	0.00379695	9606	Homo sapiens	MAOB;STAT1	2		R-HSA-6797271;R-HSA-6788582;R-HSA-6788628;R-HSA-6788623;R-HSA-6788622;R-HSA-6788571;R-HSA-6790041
R-HSA-556833	Metabolism of lipids	20	1443	0.101943	0.579699	0.579699	0.24	22	942	0.0777548	9606	Homo sapiens	ABCB1;GK;APOA1;ACSL3;GBA3;LSS;FABP1;FABP2;HMGCL;SPTLC1;FABP6;ACOX1;EHHADH;PLIN3	14		R-HSA-1861789;R-HSA-548843;R-HSA-191366;R-HSA-1989754;R-HSA-8848355;R-HSA-74180;R-HSA-6809263;R-HSA-201035;R-HSA-194187;R-HSA-400143;R-HSA-1989751;R-HSA-1989749;R-HSA-194153;R-HSA-1655828;R-HSA-75887;R-HSA-2426154;R-HSA-390256;R-HSA-6809264;R-HSA-428127;R-HSA-5334794;R-HSA-2066787;R-HSA-1989762
R-HSA-6809371	Formation of the cornified envelope	2	138	0.00974921	0.584244	0.584244	0.23	9	27	0.00222864	9606	Homo sapiens	KRT20;LIPA	2		R-HSA-6810357;R-HSA-6811539;R-HSA-6814387;R-HSA-8942224;R-HSA-6789310;R-HSA-6814734;R-HSA-6814764;R-HSA-6814298;R-HSA-6810937
R-HSA-9012852	Signaling by NOTCH3	1	63	0.00445072	0.592042	0.592042	0.23	4	37	0.00305406	9606	Homo sapiens	STAT1	1		R-HSA-9021325;R-HSA-9013567;R-HSA-9014129;R-HSA-9021334
R-HSA-6811442	Intra-Golgi and retrograde Golgi-to-ER traffic	3	218	0.0154009	0.599724	0.599724	0.22	12	48	0.00396203	9606	Homo sapiens	PLIN3;NAPG;ARFGAP2	3		R-HSA-6814678;R-HSA-8847638;R-HSA-8847637;R-HSA-6814676;R-HSA-6814675;R-HSA-6811425;R-HSA-6811422;R-HSA-6814670;R-HSA-6814684;R-HSA-6814683;R-HSA-6811418;R-HSA-6811417
R-HSA-8978934	Metabolism of cofactors	1	67	0.00473331	0.61467	0.61467	0.21	2	27	0.00222864	9606	Homo sapiens	IDH1	1		R-HSA-389540;R-HSA-389550
R-HSA-186712	Regulation of beta-cell development	1	67	0.00473331	0.61467	0.61467	0.21	1	26	0.0021461	9606	Homo sapiens	GK	1		R-HSA-211346
R-HSA-202403	TCR signaling	2	146	0.0103144	0.614893	0.614893	0.21	14	52	0.0042922	9606	Homo sapiens	SLA-DQA1;WAS	2		R-HSA-202307;R-HSA-430180;R-HSA-202214;R-HSA-202245;R-HSA-202248;R-HSA-202216;R-HSA-202344;R-HSA-8852200;R-HSA-202291;R-HSA-8855381;R-HSA-202165;R-HSA-202233;R-HSA-202168;R-HSA-202174
R-HSA-163200	Respiratory electron transport, ATP synthesis by chemiosmotic coupling, and heat production by uncoupling proteins.	2	146	0.0103144	0.614893	0.614893	0.21	4	29	0.00239373	9606	Homo sapiens	ATP5PF;NDUFA4	2		R-HSA-164834;R-HSA-164832;R-HSA-164840;R-HSA-163214
R-HSA-8956321	Nucleotide salvage	1	68	0.00480396	0.620128	0.620128	0.21	1	21	0.00173339	9606	Homo sapiens	UPP1	1		R-HSA-74372
R-HSA-379724	tRNA Aminoacylation	1	68	0.00480396	0.620128	0.620128	0.21	1	42	0.00346678	9606	Homo sapiens	WARS	1		R-HSA-379977
R-HSA-8856688	Golgi-to-ER retrograde transport	2	148	0.0104557	0.622281	0.622281	0.21	4	18	0.00148576	9606	Homo sapiens	NAPG;ARFGAP2	2		R-HSA-6811425;R-HSA-6811422;R-HSA-6811418;R-HSA-6811417
R-HSA-1474228	Degradation of the extracellular matrix	2	148	0.0104557	0.622281	0.622281	0.21	13	105	0.00866694	9606	Homo sapiens	MME;CASP3	2		R-HSA-1592314;R-HSA-1566962;R-HSA-3791295;R-HSA-1454781;R-HSA-2168046;R-HSA-2534260;R-HSA-1566981;R-HSA-1454757;R-HSA-1566979;R-HSA-1592270;R-HSA-2485148;R-HSA-1564142;R-HSA-2168923
R-HSA-1442490	Collagen degradation	1	69	0.0048746	0.62551	0.62551	0.2	4	34	0.00280644	9606	Homo sapiens	MME	1		R-HSA-1454757;R-HSA-1564142;R-HSA-2168923;R-HSA-2168046
R-HSA-186797	Signaling by PDGF	1	69	0.0048746	0.62551	0.62551	0.2	1	28	0.00231118	9606	Homo sapiens	STAT1	1		R-HSA-380782
R-HSA-112043	PLC beta mediated events	1	70	0.00494525	0.630816	0.630816	0.2	3	31	0.00255881	9606	Homo sapiens	PLCB3	1		R-HSA-112037;R-HSA-111879;R-HSA-111870
R-HSA-373755	Semaphorin interactions	1	70	0.00494525	0.630816	0.630816	0.2	1	40	0.00330169	9606	Homo sapiens	MYH14	1		R-HSA-419197
R-HSA-1428517	The citric acid (TCA) cycle and respiratory electron transport	3	229	0.016178	0.632888	0.632888	0.2	5	65	0.00536525	9606	Homo sapiens	ATP5PF;NDUFA4;IDH1	3		R-HSA-164834;R-HSA-164832;R-HSA-70967;R-HSA-164840;R-HSA-163214
R-HSA-6790901	rRNA modification in the nucleus and cytosol	1	71	0.0050159	0.636048	0.636048	0.2	1	8	0.00066	9606	Homo sapiens	THUMPD1	1		R-HSA-6790987
R-HSA-112040	G-protein mediated events	1	71	0.0050159	0.636048	0.636048	0.2	3	40	0.00330169	9606	Homo sapiens	PLCB3	1		R-HSA-112037;R-HSA-111879;R-HSA-111870
R-HSA-381119	Unfolded Protein Response (UPR)	2	153	0.0108089	0.640274	0.640274	0.19	1	94	0.00775898	9606	Homo sapiens	ASNS	1		R-HSA-1791118
R-HSA-156584	Cytosolic sulfonation of small molecules	1	72	0.00508654	0.641205	0.641205	0.19	1	24	0.00198102	9606	Homo sapiens	BPNT1	1		R-HSA-176606
R-HSA-191273	Cholesterol biosynthesis	1	72	0.00508654	0.641205	0.641205	0.19	1	32	0.00264135	9606	Homo sapiens	LSS	1		R-HSA-191366
R-HSA-389661	Glyoxylate metabolism and glycine degradation	1	73	0.00515719	0.64629	0.64629	0.19	1	23	0.00189847	9606	Homo sapiens	DAO	1		R-HSA-389821
R-HSA-428157	Sphingolipid metabolism	2	157	0.0110915	0.654181	0.654181	0.18	2	62	0.00511762	9606	Homo sapiens	SPTLC1;GBA3	2		R-HSA-1861789;R-HSA-428127
R-HSA-1280218	Adaptive Immune System	13	998	0.0705051	0.66588	0.66588	0.18	72	261	0.0215435	9606	Homo sapiens	LOC100513601;SLA-DQA1;ERAP2;ERAP1;TAP2;WAS;TAP1;AP1S1;ITGAL;AP1M2;TAPBP;HERC6	12		R-HSA-2130336;R-HSA-199043;R-HSA-199169;R-HSA-2130725;R-HSA-202245;R-HSA-199050;R-HSA-202248;R-HSA-2130731;R-HSA-983427;R-HSA-2130349;R-HSA-983426;R-HSA-2130478;R-HSA-983425;R-HSA-983424;R-HSA-2130486;R-HSA-2130619;R-HSA-2213248;R-HSA-8951595;R-HSA-198955;R-HSA-8863914;R-HSA-202291;R-HSA-202165;R-HSA-202168;R-HSA-202174;R-HSA-202307;R-HSA-8951498;R-HSA-8951499;R-HSA-8951500;R-HSA-1236949;R-HSA-12…
R-HSA-204005	COPII-mediated vesicle transport	1	77	0.00543977	0.665922	0.665922	0.18	2	16	0.00132068	9606	Homo sapiens	NAPG	1		R-HSA-5694423;R-HSA-5694425
R-HSA-8856828	Clathrin-mediated endocytosis	2	161	0.0113741	0.667657	0.667657	0.18	18	34	0.00280644	9606	Homo sapiens	TFRC;GPS1	2		R-HSA-8868071;R-HSA-8868230;R-HSA-8866277;R-HSA-8867756;R-HSA-8868236;R-HSA-8863723;R-HSA-8868651;R-HSA-8867754;R-HSA-8863721;R-HSA-8868072;R-HSA-8868648;R-HSA-8868661;R-HSA-8868660;R-HSA-8868659;R-HSA-8868658;R-HSA-8869438;R-HSA-8871194;R-HSA-8871193
R-HSA-8936459	RUNX1 regulates genes involved in megakaryocyte differentiation and platelet function	1	78	0.00551042	0.670658	0.670658	0.17	12	33	0.0027239	9606	Homo sapiens	GLOD5	1		R-HSA-8936616;R-HSA-8937016;R-HSA-8937097;R-HSA-8937050;R-HSA-8935740;R-HSA-8937037;R-HSA-8936621;R-HSA-8936481;R-HSA-8936979;R-HSA-8936995;R-HSA-8935731;R-HSA-8936628
R-HSA-446652	Interleukin-1 family signaling	2	163	0.0115154	0.674236	0.674236	0.17	15	79	0.00652084	9606	Homo sapiens	TOLLIP;CASP1	2		R-HSA-446694;R-HSA-448678;R-HSA-446692;R-HSA-9012556;R-HSA-448673;R-HSA-446862;R-HSA-446894;R-HSA-446701;R-HSA-446634;R-HSA-446868;R-HSA-9012542;R-HSA-9012689;R-HSA-448702;R-HSA-448703;R-HSA-446684
R-HSA-1445148	Translocation of SLC2A4 (GLUT4) to the plasma membrane	1	79	0.00558107	0.675327	0.675327	0.17	3	15	0.00123814	9606	Homo sapiens	TBC1D1	1		R-HSA-1445143;R-HSA-1454689;R-HSA-1454699
R-HSA-3000178	ECM proteoglycans	1	79	0.00558107	0.675327	0.675327	0.17	2	23	0.00189847	9606	Homo sapiens	TNXB	1		R-HSA-2424246;R-HSA-2681681
R-HSA-75105	Fatty acyl-CoA biosynthesis	1	79	0.00558107	0.675327	0.675327	0.17	2	24	0.00198102	9606	Homo sapiens	ACSL3	1		R-HSA-548843;R-HSA-201035
R-HSA-1660661	Sphingolipid de novo biosynthesis	1	79	0.00558107	0.675327	0.675327	0.17	1	30	0.00247627	9606	Homo sapiens	SPTLC1	1		R-HSA-428127
R-HSA-199977	ER to Golgi Anterograde Transport	2	164	0.011586	0.677486	0.677486	0.17	6	39	0.00321915	9606	Homo sapiens	NAPG;ARFGAP2	2		R-HSA-6809015;R-HSA-6809014;R-HSA-5694423;R-HSA-6807877;R-HSA-6807875;R-HSA-5694425
R-HSA-4086398	Ca2+ pathway	1	80	0.00565171	0.67993	0.67993	0.17	2	27	0.00222864	9606	Homo sapiens	PLCB3	1		R-HSA-398193;R-HSA-398040
R-HSA-204998	Cell death signalling via NRAGE, NRIF and NADE	1	80	0.00565171	0.67993	0.67993	0.17	1	17	0.00140322	9606	Homo sapiens	CASP3	1		R-HSA-205117
R-HSA-5625740	RHO GTPases activate PKNs	1	80	0.00565171	0.67993	0.67993	0.17	1	20	0.00165085	9606	Homo sapiens	MYH14	1		R-HSA-419232
R-HSA-380270	Recruitment of mitotic centrosome proteins and complexes	1	81	0.00572236	0.684469	0.684469	0.16	1	3	0.000248	9606	Homo sapiens	TUBGCP2	1		R-HSA-380283
R-HSA-499943	Interconversion of nucleotide di- and triphosphates	1	81	0.00572236	0.684469	0.684469	0.16	1	33	0.0027239	9606	Homo sapiens	AK3	1		R-HSA-6788798
R-HSA-1236977	Endosomal/Vacuolar pathway	1	82	0.00579301	0.688943	0.688943	0.16	3	4	0.00033	9606	Homo sapiens	LOC100513601	1		R-HSA-1236964;R-HSA-1236954;R-HSA-1236943
R-HSA-1474244	Extracellular matrix organization	4	329	0.0232427	0.688978	0.688978	0.16	17	318	0.0262485	9606	Homo sapiens	TNXB;MME;CASP3;ITGAL	4		R-HSA-1592314;R-HSA-1566962;R-HSA-3791295;R-HSA-199050;R-HSA-1454781;R-HSA-2168046;R-HSA-2534260;R-HSA-2424246;R-HSA-1566981;R-HSA-1454757;R-HSA-1566979;R-HSA-1592270;R-HSA-2681681;R-HSA-2485148;R-HSA-1564142;R-HSA-2168923;R-HSA-202718
R-HSA-380287	Centrosome maturation	1	83	0.00586365	0.693355	0.693355	0.16	1	6	0.000495	9606	Homo sapiens	TUBGCP2	1		R-HSA-380283
R-HSA-8939902	Regulation of RUNX2 expression and activity	1	83	0.00586365	0.693355	0.693355	0.16	2	32	0.00264135	9606	Homo sapiens	STAT1	1		R-HSA-9008015;R-HSA-9007999
R-HSA-6781827	Transcription-Coupled Nucleotide Excision Repair (TC-NER)	1	85	0.00600495	0.701991	0.701991	0.15	1	16	0.00132068	9606	Homo sapiens	GPS1	1		R-HSA-6781833
R-HSA-216083	Integrin cell surface interactions	1	86	0.00607559	0.706218	0.706218	0.15	2	54	0.00445728	9606	Homo sapiens	ITGAL	1		R-HSA-199050;R-HSA-202718
R-HSA-196807	Nicotinate metabolism	1	86	0.00607559	0.706218	0.706218	0.15	1	29	0.00239373	9606	Homo sapiens	NAPRT1	1		R-HSA-197186
R-HSA-1660662	Glycosphingolipid metabolism	1	86	0.00607559	0.706218	0.706218	0.15	1	32	0.00264135	9606	Homo sapiens	GBA3	1		R-HSA-1861789
R-HSA-5579029	Metabolic disorders of biological oxidation enzymes	1	88	0.00621688	0.714495	0.714495	0.15	1	39	0.00321915	9606	Homo sapiens	MAOB	1		R-HSA-5603108
R-HSA-1483249	Inositol phosphate metabolism	1	90	0.00635818	0.722539	0.722539	0.14	1	71	0.0058605	9606	Homo sapiens	PLCB3	1		R-HSA-1855177
R-HSA-5696399	Global Genome Nucleotide Excision Repair (GG-NER)	1	92	0.00649947	0.730357	0.730357	0.14	1	20	0.00165085	9606	Homo sapiens	GPS1	1		R-HSA-5691006
R-HSA-1226099	Signaling by FGFR in disease	1	93	0.00657012	0.734184	0.734184	0.13	1	106	0.00874948	9606	Homo sapiens	STAT1	1		R-HSA-1888198
R-HSA-112315	Transmission across Chemical Synapses	4	352	0.0248675	0.738277	0.738277	0.13	8	157	0.0129591	9606	Homo sapiens	PLCB3;MAOB;MYO6;COMT	4		R-HSA-141186;R-HSA-379382;R-HSA-416320;R-HSA-379395;R-HSA-374909;R-HSA-500717;R-HSA-379464;R-HSA-379387
R-HSA-447115	Interleukin-12 family signaling	1	96	0.00678206	0.745343	0.745343	0.13	17	114	0.00940982	9606	Homo sapiens	STAT1	1		R-HSA-8950441;R-HSA-8950733;R-HSA-8983983;R-HSA-8984014;R-HSA-8983841;R-HSA-8984963;R-HSA-8983845;R-HSA-8984964;R-HSA-8983835;R-HSA-8950522;R-HSA-8983996;R-HSA-8950782;R-HSA-8984021;R-HSA-8950485;R-HSA-8950453;R-HSA-8950518;R-HSA-8984023
R-HSA-5619102	SLC transporter disorders	2	188	0.0132815	0.747829	0.747829	0.13	3	66	0.00544779	9606	Homo sapiens	GK;SLC27A4	2		R-HSA-5661474;R-HSA-5627891;R-HSA-5621918
R-HSA-380320	Recruitment of NuMA to mitotic centrosomes	1	97	0.0068527	0.748958	0.748958	0.13	2	2	0.000165	9606	Homo sapiens	TUBGCP2	1		R-HSA-380316;R-HSA-380508
R-HSA-388841	Costimulation by the CD28 family	1	97	0.0068527	0.748958	0.748958	0.13	1	34	0.00280644	9606	Homo sapiens	SLA-DQA1	1		R-HSA-389758
R-HSA-71406	Pyruvate metabolism and Citric Acid (TCA) cycle	1	98	0.00692335	0.752522	0.752522	0.12	1	36	0.00297152	9606	Homo sapiens	IDH1	1		R-HSA-70967
R-HSA-73884	Base Excision Repair	1	98	0.00692335	0.752522	0.752522	0.12	1	104	0.0085844	9606	Homo sapiens	ADPRHL2	1		R-HSA-8952903
R-HSA-112310	Neurotransmitter release cycle	1	99	0.006994	0.756035	0.756035	0.12	1	36	0.00297152	9606	Homo sapiens	MAOB	1		R-HSA-374909
R-HSA-2682334	EPH-Ephrin signaling	1	101	0.00713529	0.762914	0.762914	0.12	1	56	0.00462237	9606	Homo sapiens	MYH14	1		R-HSA-3928616
R-HSA-983231	Factors involved in megakaryocyte development and platelet production	2	194	0.0137054	0.763229	0.763229	0.12	2	43	0.00354932	9606	Homo sapiens	GLOD5;AK3	2		R-HSA-1008248;R-HSA-996755
R-HSA-416476	G alpha (q) signalling events	3	282	0.0199223	0.765481	0.765481	0.12	17	35	0.00288898	9606	Homo sapiens	PLCB3;MYO1A;GNAQ	3		R-HSA-8982025;R-HSA-416358;R-HSA-114688;R-HSA-416516;R-HSA-8982026;R-HSA-749448;R-HSA-749452;R-HSA-8982017;R-HSA-398188;R-HSA-400586;R-HSA-379048;R-HSA-8964280;R-HSA-418582;R-HSA-8964284;R-HSA-416510;R-HSA-750993;R-HSA-8964340
R-HSA-8939236	RUNX1 regulates transcription of genes involved in differentiation of HSCs	1	106	0.00748852	0.779279	0.779279	0.11	1	15	0.00123814	9606	Homo sapiens	GLOD5	1		R-HSA-8956568
R-HSA-193704	p75 NTR receptor-mediated signalling	1	108	0.00762981	0.785506	0.785506	0.1	1	50	0.00412711	9606	Homo sapiens	CASP3	1		R-HSA-205117
R-HSA-9020702	Interleukin-1 signaling	1	109	0.00770046	0.788553	0.788553	0.1	8	46	0.00379695	9606	Homo sapiens	TOLLIP	1		R-HSA-446694;R-HSA-446868;R-HSA-446692;R-HSA-446862;R-HSA-446894;R-HSA-446684;R-HSA-446701;R-HSA-446634
R-HSA-1266738	Developmental Biology	14	1177	0.0831508	0.790929	0.790929	0.1	21	484	0.0399505	9606	Homo sapiens	GK;RPS19;RPS29;RPL23;RPL34;RPL37A;RPL11;MYH14;RPL24;RPL35A;KRT20;LIPA	12		R-HSA-6806629;R-HSA-6805573;R-HSA-6814734;R-HSA-6814764;R-HSA-6805546;R-HSA-211346;R-HSA-6806613;R-HSA-6810357;R-HSA-3928616;R-HSA-6811539;R-HSA-6814387;R-HSA-9014652;R-HSA-6806610;R-HSA-6809393;R-HSA-6809663;R-HSA-8942224;R-HSA-6789310;R-HSA-9014610;R-HSA-419197;R-HSA-6814298;R-HSA-6810937
R-HSA-9614085	FOXO-mediated transcription	1	110	0.00777111	0.791558	0.791558	0.1	1	85	0.0070161	9606	Homo sapiens	GK	1		R-HSA-9625124
R-HSA-983712	Ion channel transport	2	207	0.0146238	0.79383	0.79383	0.1	4	39	0.00321915	9606	Homo sapiens	CLCA1;CLCA4	2		R-HSA-2744361;R-HSA-5333671;R-HSA-2744242;R-HSA-2684901
R-HSA-111885	Opioid Signalling	1	111	0.00784175	0.79452	0.79452	0.1	3	57	0.00470491	9606	Homo sapiens	PLCB3	1		R-HSA-112037;R-HSA-111879;R-HSA-111870
R-HSA-163125	Post-translational modification: synthesis of GPI-anchored proteins	1	115	0.00812434	0.805954	0.805954	0.09	1	16	0.00132068	9606	Homo sapiens	XPNPEP2	1		R-HSA-8940388
R-HSA-611105	Respiratory electron transport	1	115	0.00812434	0.805954	0.805954	0.09	1	19	0.0015683	9606	Homo sapiens	NDUFA4	1		R-HSA-163214
R-HSA-449147	Signaling by Interleukins	7	641	0.0452844	0.808669	0.808669	0.09	65	492	0.0406108	9606	Homo sapiens	MAOB;STAT1;TOLLIP;CASP3;CASP1	5		R-HSA-6788582;R-HSA-8987150;R-HSA-1112727;R-HSA-446862;R-HSA-1112602;R-HSA-8984963;R-HSA-8987266;R-HSA-1112604;R-HSA-8985988;R-HSA-8984964;R-HSA-8987270;R-HSA-9006873;R-HSA-8987033;R-HSA-446868;R-HSA-8983835;R-HSA-1112587;R-HSA-9006870;R-HSA-448678;R-HSA-8950441;R-HSA-8985900;R-HSA-8983983;R-HSA-448673;R-HSA-446894;R-HSA-8983841;R-HSA-446634;R-HSA-8983845;R-HSA-6797271;R-HSA-8983996;R-HSA-449073;…
R-HSA-5696398	Nucleotide Excision Repair	1	119	0.00840692	0.816756	0.816756	0.09	2	36	0.00297152	9606	Homo sapiens	GPS1	1		R-HSA-5691006;R-HSA-6781833
R-HSA-948021	Transport to the Golgi and subsequent modification	2	219	0.0154716	0.818935	0.818935	0.09	6	60	0.00495254	9606	Homo sapiens	NAPG;ARFGAP2	2		R-HSA-6809015;R-HSA-6809014;R-HSA-5694423;R-HSA-6807877;R-HSA-6807875;R-HSA-5694425
R-HSA-166663	Initial triggering of complement	1	120	0.00847757	0.819361	0.819361	0.09	2	21	0.00173339	9606	Homo sapiens	CFD	1		R-HSA-183122;R-HSA-173745
R-HSA-5607764	CLEC7A (Dectin-1) signaling	1	120	0.00847757	0.819361	0.819361	0.09	2	45	0.0037144	9606	Homo sapiens	ASC	1		R-HSA-5660662;R-HSA-5660663
R-HSA-194068	Bile acid and bile salt metabolism	1	121	0.00854822	0.82193	0.82193	0.09	2	94	0.00775898	9606	Homo sapiens	FABP6	1		R-HSA-194187;R-HSA-194153
R-HSA-202424	Downstream TCR signaling	1	124	0.00876016	0.82942	0.82942	0.08	1	24	0.00198102	9606	Homo sapiens	SLA-DQA1	1		R-HSA-202307
R-HSA-5628897	TP53 Regulates Metabolic Genes	1	125	0.0088308	0.831846	0.831846	0.08	1	34	0.00280644	9606	Homo sapiens	NDUFA4	1		R-HSA-163214
R-HSA-6805567	Keratinization	2	226	0.0159661	0.832289	0.832289	0.08	16	34	0.00280644	9606	Homo sapiens	KRT20;LIPA	2		R-HSA-6806629;R-HSA-6805573;R-HSA-6814734;R-HSA-6814764;R-HSA-6805546;R-HSA-6806613;R-HSA-6810357;R-HSA-6811539;R-HSA-6814387;R-HSA-6806610;R-HSA-6809393;R-HSA-6809663;R-HSA-8942224;R-HSA-6789310;R-HSA-6814298;R-HSA-6810937
R-HSA-8957322	Metabolism of steroids	3	321	0.0226775	0.836042	0.836042	0.08	5	234	0.0193149	9606	Homo sapiens	FABP6;LSS	2		R-HSA-191366;R-HSA-194187;R-HSA-194153;R-HSA-1655828;R-HSA-2426154
R-HSA-1592230	Mitochondrial biogenesis	1	127	0.00897209	0.836596	0.836596	0.08	1	36	0.00297152	9606	Homo sapiens	ATP5PF	1		R-HSA-8949580
R-HSA-112314	Neurotransmitter receptors and postsynaptic signal transmission	2	231	0.0163193	0.84128	0.84128	0.08	2	105	0.00866694	9606	Homo sapiens	PLCB3;MYO6	2		R-HSA-416320;R-HSA-500717
R-HSA-8956319	Nucleobase catabolism	1	139	0.00981985	0.862419	0.862419	0.06	1	58	0.00478745	9606	Homo sapiens	UPP1	1		R-HSA-74376
R-HSA-196849	Metabolism of water-soluble vitamins and cofactors	2	252	0.0178029	0.874469	0.874469	0.06	4	140	0.0115559	9606	Homo sapiens	NAPRT1;PDXK	2		R-HSA-964958;R-HSA-197186;R-HSA-964970;R-HSA-964962
R-HSA-15869	Metabolism of nucleotides	2	254	0.0179442	0.877274	0.877274	0.06	3	135	0.0111432	9606	Homo sapiens	AK3;UPP1	2		R-HSA-74372;R-HSA-6788798;R-HSA-74376
R-HSA-8878166	Transcriptional regulation by RUNX2	1	147	0.010385	0.877336	0.877336	0.06	2	84	0.00693355	9606	Homo sapiens	STAT1	1		R-HSA-9008015;R-HSA-9007999
R-HSA-166658	Complement cascade	1	156	0.0110208	0.892201	0.892201	0.05	2	71	0.0058605	9606	Homo sapiens	CFD	1		R-HSA-183122;R-HSA-173745
R-HSA-73887	Death Receptor Signalling	1	157	0.0110915	0.893738	0.893738	0.05	1	90	0.00742881	9606	Homo sapiens	CASP3	1		R-HSA-205117
R-HSA-2029482	Regulation of actin dynamics for phagocytic cup formation	1	158	0.0111621	0.895253	0.895253	0.05	6	24	0.00198102	9606	Homo sapiens	WAS	1		R-HSA-2197698;R-HSA-2029466;R-HSA-442592;R-HSA-2197691;R-HSA-2197690;R-HSA-442586
R-HSA-73894	DNA Repair	3	368	0.0259979	0.896199	0.896199	0.05	8	326	0.0269088	9606	Homo sapiens	ADPRHL2;GPS1;ISG15	3		R-HSA-5653766;R-HSA-5653780;R-HSA-5691006;R-HSA-5653786;R-HSA-5653754;R-HSA-5653770;R-HSA-6781833;R-HSA-8952903
R-HSA-109582	Hemostasis	8	826	0.0583539	0.904799	0.904799	0.04	16	327	0.0269913	9606	Homo sapiens	CFD;ITIH4;ITIH3;GNAQ;GLOD5;AK3;APOA1;ITGAL	8		R-HSA-396996;R-HSA-428750;R-HSA-481007;R-HSA-428749;R-HSA-428941;R-HSA-397835;R-HSA-418581;R-HSA-418579;R-HSA-482770;R-HSA-481009;R-HSA-428752;R-HSA-418576;R-HSA-1008248;R-HSA-996755;R-HSA-202718;R-HSA-114558
R-HSA-3858494	Beta-catenin independent WNT signaling	1	165	0.0116567	0.905273	0.905273	0.04	2	51	0.00420966	9606	Homo sapiens	PLCB3	1		R-HSA-398193;R-HSA-398040
R-HSA-418594	G alpha (i) signalling events	5	567	0.0400565	0.90783	0.90783	0.04	12	161	0.0132893	9606	Homo sapiens	PLCB3;APOC3;APOA1;APOA4;APOE	5		R-HSA-2395764;R-HSA-112037;R-HSA-2187332;R-HSA-111879;R-HSA-2404131;R-HSA-2404140;R-HSA-2424254;R-HSA-2395768;R-HSA-2395784;R-HSA-2423785;R-HSA-2429643;R-HSA-111870
R-HSA-112316	Neuronal System	4	498	0.0351819	0.925485	0.925485	0.03	8	210	0.0173339	9606	Homo sapiens	PLCB3;MAOB;MYO6;COMT	4		R-HSA-141186;R-HSA-379382;R-HSA-416320;R-HSA-379395;R-HSA-374909;R-HSA-500717;R-HSA-379464;R-HSA-379387
R-HSA-109581	Apoptosis	1	187	0.0132109	0.930961	0.930961	0.03	39	139	0.0114734	9606	Homo sapiens	CASP3	1		R-HSA-351877;R-HSA-201603;R-HSA-202947;R-HSA-211651;R-HSA-351876;R-HSA-114306;R-HSA-201611;R-HSA-201608;R-HSA-212552;R-HSA-373705;R-HSA-114252;R-HSA-211219;R-HSA-202960;R-HSA-202967;R-HSA-201622;R-HSA-202966;R-HSA-351901;R-HSA-418846;R-HSA-202969;R-HSA-418845;R-HSA-201631;R-HSA-201630;R-HSA-201629;R-HSA-201628;R-HSA-418852;R-HSA-201639;R-HSA-202917;R-HSA-201636;R-HSA-201640;R-HSA-351913;R-HSA-351…
R-HSA-2029480	Fcgamma receptor (FCGR) dependent phagocytosis	1	193	0.0136348	0.936673	0.936673	0.03	6	42	0.00346678	9606	Homo sapiens	WAS	1		R-HSA-2197698;R-HSA-2029466;R-HSA-442592;R-HSA-2197691;R-HSA-2197690;R-HSA-442586
R-HSA-5357801	Programmed Cell Death	1	195	0.0137761	0.93847	0.93847	0.03	39	152	0.0125464	9606	Homo sapiens	CASP3	1		R-HSA-351877;R-HSA-201603;R-HSA-202947;R-HSA-211651;R-HSA-351876;R-HSA-114306;R-HSA-201611;R-HSA-201608;R-HSA-212552;R-HSA-373705;R-HSA-114252;R-HSA-211219;R-HSA-202960;R-HSA-202967;R-HSA-201622;R-HSA-202966;R-HSA-351901;R-HSA-418846;R-HSA-202969;R-HSA-418845;R-HSA-201631;R-HSA-201630;R-HSA-201629;R-HSA-201628;R-HSA-418852;R-HSA-201639;R-HSA-202917;R-HSA-201636;R-HSA-201640;R-HSA-351913;R-HSA-351…
R-HSA-425407	SLC-mediated transmembrane transport	3	421	0.0297421	0.939729	0.939729	0.03	2	190	0.015683	9606	Homo sapiens	SLC25A5;SLC27A4	2		R-HSA-879585;R-HSA-163215
R-HSA-198933	Immunoregulatory interactions between a Lymphoid and a non-Lymphoid cell	2	316	0.0223243	0.940221	0.940221	0.03	4	43	0.00354932	9606	Homo sapiens	LOC100513601;ITGAL	2		R-HSA-199043;R-HSA-199169;R-HSA-198955;R-HSA-199050
R-HSA-5621481	C-type lectin receptors (CLRs)	1	202	0.0142706	0.944371	0.944371	0.02	2	68	0.00561288	9606	Homo sapiens	ASC	1		R-HSA-5660662;R-HSA-5660663
R-HSA-375276	Peptide ligand-binding receptors	1	202	0.0142706	0.944371	0.944371	0.02	1	75	0.00619067	9606	Homo sapiens	MYO1A	1		R-HSA-383373
R-HSA-8978868	Fatty acid metabolism	3	429	0.0303073	0.944604	0.944604	0.02	6	217	0.0179117	9606	Homo sapiens	ACOX1;EHHADH;ACSL3	3		R-HSA-548843;R-HSA-390256;R-HSA-6809264;R-HSA-6809263;R-HSA-201035;R-HSA-2066787
R-HSA-195258	RHO GTPase Effectors	2	326	0.0230307	0.94693	0.94693	0.02	11	112	0.00924474	9606	Homo sapiens	WAS;MYH14	2		R-HSA-5668932;R-HSA-2197698;R-HSA-2029466;R-HSA-5668978;R-HSA-442592;R-HSA-419232;R-HSA-5671919;R-HSA-2197691;R-HSA-2197690;R-HSA-419197;R-HSA-442586
R-HSA-5689880	Ub-specific processing proteases	1	206	0.0145532	0.947486	0.947486	0.02	4	40	0.00330169	9606	Homo sapiens	DDX58	1		R-HSA-5696564;R-HSA-936390;R-HSA-5690159;R-HSA-5696600
R-HSA-68877	Mitotic Prometaphase	1	207	0.0146238	0.948238	0.948238	0.02	2	15	0.00123814	9606	Homo sapiens	TUBGCP2	1		R-HSA-380316;R-HSA-380508
R-HSA-69275	G2/M Transition	1	212	0.014977	0.951837	0.951837	0.02	1	78	0.0064383	9606	Homo sapiens	TUBGCP2	1		R-HSA-380283
R-HSA-453274	Mitotic G2-G2/M phases	1	214	0.0151183	0.953206	0.953206	0.02	1	80	0.00660338	9606	Homo sapiens	TUBGCP2	1		R-HSA-380283
R-HSA-392499	Metabolism of proteins	25	2354	0.166302	0.958812	0.958812	0.02	48	890	0.0734627	9606	Homo sapiens	ENPEP;WARS;MME;DDX58;GPS1;RPL23;RPL34;RPL11;ASNS;RPL35A;APOA1;APOA4;NAPG;ARFGAP2;RPS19;XPNPEP2;RPS29;ANPEP;RPL37A;RPL24;APOE;CES1	22		R-HSA-8956040;R-HSA-5694423;R-HSA-9619024;R-HSA-8956045;R-HSA-1799326;R-HSA-936390;R-HSA-156808;R-HSA-379977;R-HSA-5696600;R-HSA-5694425;R-HSA-6809015;R-HSA-976734;R-HSA-6809014;R-HSA-156823;R-HSA-1791118;R-HSA-156826;R-HSA-157849;R-HSA-72671;R-HSA-72673;R-HSA-72672;R-HSA-2022399;R-HSA-6807877;R-HSA-5696564;R-HSA-2022396;R-HSA-6807875;R-HSA-72676;R-HSA-141671;R-HSA-2022393;R-HSA-156907;R-HSA-8952…
R-HSA-8951664	Neddylation	1	241	0.0170258	0.968307	0.968307	0.01	2	31	0.00255881	9606	Homo sapiens	GPS1	1		R-HSA-8956040;R-HSA-8956045
R-HSA-3700989	Transcriptional Regulation by TP53	3	486	0.0343342	0.970079	0.970079	0.01	3	259	0.0213785	9606	Homo sapiens	NDUFA4;CASP1	2		R-HSA-6798082;R-HSA-6798081;R-HSA-163214
R-HSA-202733	Cell surface interactions at the vascular wall	1	256	0.0180855	0.974484	0.974484	0.01	1	64	0.00528271	9606	Homo sapiens	ITGAL	1		R-HSA-202718
R-HSA-157118	Signaling by NOTCH	1	257	0.0181561	0.974851	0.974851	0.01	4	152	0.0125464	9606	Homo sapiens	STAT1	1		R-HSA-9021325;R-HSA-9013567;R-HSA-9014129;R-HSA-9021334
R-HSA-8878171	Transcriptional regulation by RUNX1	1	261	0.0184387	0.976264	0.976264	0.01	13	132	0.0108956	9606	Homo sapiens	GLOD5	1		R-HSA-8936616;R-HSA-8937097;R-HSA-8937037;R-HSA-8936621;R-HSA-8936481;R-HSA-8936995;R-HSA-8937016;R-HSA-8956568;R-HSA-8937050;R-HSA-8935740;R-HSA-8936979;R-HSA-8935731;R-HSA-8936628
R-HSA-446203	Asparagine N-linked glycosylation	2	421	0.0297421	0.98343	0.98343	0.01	6	144	0.0118861	9606	Homo sapiens	NAPG;ARFGAP2	2		R-HSA-6809015;R-HSA-6809014;R-HSA-5694423;R-HSA-6807877;R-HSA-6807875;R-HSA-5694425
R-HSA-5688426	Deubiquitination	1	288	0.0203462	0.983945	0.983945	0.01	5	77	0.00635576	9606	Homo sapiens	DDX58	1		R-HSA-5696564;R-HSA-936381;R-HSA-936390;R-HSA-5690159;R-HSA-5696600
R-HSA-983168	Antigen processing: Ubiquitination & Proteasome degradation	1	315	0.0222536	0.989149	0.989149	0	4	9	0.000743	9606	Homo sapiens	HERC6	1		R-HSA-983147;R-HSA-983157;R-HSA-983156;R-HSA-983140
R-HSA-194315	Signaling by Rho GTPases	2	457	0.0322854	0.98948	0.98948	0	11	117	0.00965745	9606	Homo sapiens	WAS;MYH14	2		R-HSA-5668932;R-HSA-2197698;R-HSA-2029466;R-HSA-5668978;R-HSA-442592;R-HSA-419232;R-HSA-5671919;R-HSA-2197691;R-HSA-2197690;R-HSA-419197;R-HSA-442586
R-HSA-195721	Signaling by WNT	1	330	0.0233133	0.991274	0.991274	0	2	156	0.0128766	9606	Homo sapiens	PLCB3	1		R-HSA-398193;R-HSA-398040
R-HSA-1852241	Organelle biogenesis and maintenance	1	335	0.0236665	0.991886	0.991886	0	1	86	0.00709864	9606	Homo sapiens	ATP5PF	1		R-HSA-8949580
R-HSA-9006934	Signaling by Receptor Tyrosine Kinases	2	521	0.0368068	0.995377	0.995377	0	5	633	0.0522493	9606	Homo sapiens	STAT1	1		R-HSA-1433456;R-HSA-1470012;R-HSA-380782;R-HSA-1470010;R-HSA-1470009
R-HSA-68886	M Phase	1	390	0.0275521	0.99636	0.99636	0	2	66	0.00544779	9606	Homo sapiens	TUBGCP2	1		R-HSA-380316;R-HSA-380508
R-HSA-373076	Class A/1 (Rhodopsin-like receptors)	1	458	0.0323561	0.998655	0.998655	0	1	150	0.0123813	9606	Homo sapiens	MYO1A	1		R-HSA-383373
R-HSA-212436	Generic Transcription Pathway	10	1525	0.107736	0.99882	0.99882	0	23	811	0.0669418	9606	Homo sapiens	GK;NDUFA4;STAT1;GLOD5;CASP1;APOE;ITGAL	7		R-HSA-8936616;R-HSA-8869575;R-HSA-8937097;R-HSA-8937037;R-HSA-8936621;R-HSA-6798082;R-HSA-6798081;R-HSA-9008015;R-HSA-8936481;R-HSA-8936995;R-HSA-163214;R-HSA-8937016;R-HSA-8956568;R-HSA-8869590;R-HSA-8937050;R-HSA-8935740;R-HSA-9007999;R-HSA-9625124;R-HSA-8949343;R-HSA-8936979;R-HSA-8935731;R-HSA-8936628;R-HSA-8949335
R-HSA-5663202	Diseases of signal transduction	1	489	0.0345461	0.999147	0.999147	0	1	289	0.0238547	9606	Homo sapiens	STAT1	1		R-HSA-1888198
R-HSA-73857	RNA Polymerase II Transcription	10	1664	0.117556	0.999705	0.999705	0	23	872	0.0719769	9606	Homo sapiens	GK;NDUFA4;STAT1;GLOD5;CASP1;APOE;ITGAL	7		R-HSA-8936616;R-HSA-8869575;R-HSA-8937097;R-HSA-8937037;R-HSA-8936621;R-HSA-6798082;R-HSA-6798081;R-HSA-9008015;R-HSA-8936481;R-HSA-8936995;R-HSA-163214;R-HSA-8937016;R-HSA-8956568;R-HSA-8869590;R-HSA-8937050;R-HSA-8935740;R-HSA-9007999;R-HSA-9625124;R-HSA-8949343;R-HSA-8936979;R-HSA-8935731;R-HSA-8936628;R-HSA-8949335
R-HSA-388396	GPCR downstream signalling	7	1358	0.0959378	0.999739	0.999739	0	31	254	0.0209657	9606	Homo sapiens	PLCB3;MYO1A;GNAQ;APOC3;APOA1;APOA4;APOE	7		R-HSA-8982025;R-HSA-114688;R-HSA-416516;R-HSA-8982026;R-HSA-749448;R-HSA-111879;R-HSA-749452;R-HSA-2404131;R-HSA-8982017;R-HSA-2404140;R-HSA-400586;R-HSA-2423785;R-HSA-418582;R-HSA-2395764;R-HSA-750993;R-HSA-2424254;R-HSA-2395768;R-HSA-398040;R-HSA-416358;R-HSA-112037;R-HSA-2187332;R-HSA-398188;R-HSA-2395784;R-HSA-379048;R-HSA-2429643;R-HSA-8964280;R-HSA-8964284;R-HSA-398193;R-HSA-416510;R-HSA-89…
R-HSA-69278	Cell Cycle, Mitotic	1	570	0.0402685	0.999742	0.999742	0	3	322	0.0265786	9606	Homo sapiens	TUBGCP2	1		R-HSA-380316;R-HSA-380508;R-HSA-380283
R-HSA-8953897	Cellular responses to external stimuli	1	621	0.0438714	0.999879	0.999879	0	3	269	0.0222039	9606	Homo sapiens	CES1	1		R-HSA-5662598;R-HSA-5662608;R-HSA-5662986
R-HSA-500792	GPCR ligand binding	1	649	0.0458495	0.99992	0.99992	0	1	177	0.01461	9606	Homo sapiens	MYO1A	1		R-HSA-383373
R-HSA-372790	Signaling by GPCR	7	1481	0.104627	0.999935	0.999935	0	32	431	0.0355757	9606	Homo sapiens	PLCB3;MYO1A;GNAQ;APOC3;APOA1;APOA4;APOE	7		R-HSA-8982025;R-HSA-114688;R-HSA-416516;R-HSA-8982026;R-HSA-749448;R-HSA-111879;R-HSA-749452;R-HSA-2404131;R-HSA-8982017;R-HSA-2404140;R-HSA-383373;R-HSA-400586;R-HSA-2423785;R-HSA-418582;R-HSA-2395764;R-HSA-750993;R-HSA-2424254;R-HSA-2395768;R-HSA-398040;R-HSA-416358;R-HSA-112037;R-HSA-2187332;R-HSA-398188;R-HSA-2395784;R-HSA-379048;R-HSA-2429643;R-HSA-8964280;R-HSA-8964284;R-HSA-398193;R-HSA-41…
R-HSA-74160	Gene expression (Transcription)	10	1822	0.128718	0.999945	0.999945	0	23	983	0.0811391	9606	Homo sapiens	GK;NDUFA4;STAT1;GLOD5;CASP1;APOE;ITGAL	7		R-HSA-8936616;R-HSA-8869575;R-HSA-8937097;R-HSA-8937037;R-HSA-8936621;R-HSA-6798082;R-HSA-6798081;R-HSA-9008015;R-HSA-8936481;R-HSA-8936995;R-HSA-163214;R-HSA-8937016;R-HSA-8956568;R-HSA-8869590;R-HSA-8937050;R-HSA-8935740;R-HSA-9007999;R-HSA-9625124;R-HSA-8949343;R-HSA-8936979;R-HSA-8935731;R-HSA-8936628;R-HSA-8949335
R-HSA-1640170	Cell Cycle	1	682	0.0481809	0.999951	0.999951	0	3	410	0.0338423	9606	Homo sapiens	TUBGCP2	1		R-HSA-380316;R-HSA-380508;R-HSA-380283
R-HSA-597592	Post-translational protein modification	7	1594	0.11261	0.999983	0.999983	0	15	524	0.0432522	9606	Homo sapiens	XPNPEP2;DDX58;GPS1;APOA1;APOE;NAPG;ARFGAP2	7		R-HSA-8956040;R-HSA-5694423;R-HSA-6807877;R-HSA-5696564;R-HSA-6807875;R-HSA-8956045;R-HSA-936390;R-HSA-8952289;R-HSA-8940388;R-HSA-5696600;R-HSA-5694425;R-HSA-6809015;R-HSA-6809014;R-HSA-936381;R-HSA-5690159
R-HSA-162582	Signal Transduction	12	3202	0.22621	1	1	0	55	2214	0.182749	9606	Homo sapiens	PLCB3;MYO1A;STAT1;GNAQ;CASP3;WAS;MYH14;APOC3;APOA1;APOA4;APOE	11		R-HSA-8982025;R-HSA-114688;R-HSA-416516;R-HSA-8982026;R-HSA-749448;R-HSA-9021325;R-HSA-2029466;R-HSA-111879;R-HSA-749452;R-HSA-2404131;R-HSA-2028697;R-HSA-8982017;R-HSA-2404140;R-HSA-383373;R-HSA-2028692;R-HSA-418582;R-HSA-5668932;R-HSA-750993;R-HSA-2424254;R-HSA-2197691;R-HSA-2197690;R-HSA-9021334;R-HSA-112037;R-HSA-5668978;R-HSA-419232;R-HSA-1470012;R-HSA-2395784;R-HSA-1470010;R-HSA-379048;R-HS…

## Sheet: DEPs from PEDV+PR VS PEDV
Pathway identifier	Pathway name	#Entities found	#Entities total	Entities ratio	Entities pValue	Entities FDR	Negative logarithm（FDR)	#Reactions found	#Reactions total	Reactions ratio	Species identifier	Species name	Submitted entities found	Number of proteins	Mapped entities	Found reaction identifiers
R-HSA-913531	Interferon Signaling	29	392	0.0276934	1.11e-16	2.21e-14	13.66	41	66	0.00544779	9606	Homo sapiens	SLA-DQA1;RSAD2;DDX58;STAT1;MX2;MX1;ISG15;SAMHD1;IFIT3;LOC100513601;OAS1;OAS2;GBP2;TRIM31;B2M;EIF4G3	16		R-HSA-8985097;R-HSA-936462;R-HSA-997326;R-HSA-8983688;R-HSA-8985153;R-HSA-8983680;R-HSA-873927;R-HSA-1169307;R-HSA-873921;R-HSA-873922;R-HSA-909725;R-HSA-909726;R-HSA-909721;R-HSA-909722;R-HSA-1015702;R-HSA-8985104;R-HSA-909718;R-HSA-1015699;R-HSA-1678841;R-HSA-1169395;R-HSA-1678843;R-HSA-1678842;R-HSA-1169394;R-HSA-1169397;R-HSA-1169399;R-HSA-1169398;R-HSA-1176059;R-HSA-1169403;R-HSA-1031716;R-H…
R-HSA-909733	Interferon alpha/beta signaling	21	184	0.0129989	1.11e-16	2.21e-14	13.66	9	20	0.00165085	9606	Homo sapiens	LOC100513601;RSAD2;OAS1;OAS2;STAT1;MX2;MX1;ISG15;SAMHD1;GBP2;IFIT3	11		R-HSA-909725;R-HSA-997309;R-HSA-909726;R-HSA-913529;R-HSA-909721;R-HSA-909722;R-HSA-1015702;R-HSA-909718;R-HSA-1015699
R-HSA-1280215	Cytokine Signaling in Immune system	34	1056	0.0746026	1.83e-13	2.44e-11	10.61	96	640	0.0528271	9606	Homo sapiens	SLA-DQA1;RSAD2;DDX58;STAT1;MX2;MX1;ITGB2;ISG15;SAMHD1;IFIT3;PSMB6;PSMB7;LOC100513601;OAS1;OAS2;GBP2;TRIM31;B2M;EIF4G3	19		R-HSA-8985097;R-HSA-936462;R-HSA-6788582;R-HSA-8983688;R-HSA-8987150;R-HSA-1112727;R-HSA-8983680;R-HSA-1112602;R-HSA-8984963;R-HSA-1169307;R-HSA-8987266;R-HSA-1112604;R-HSA-8985988;R-HSA-8984964;R-HSA-8987270;R-HSA-909725;R-HSA-9006873;R-HSA-8987033;R-HSA-1168768;R-HSA-8983835;R-HSA-909726;R-HSA-909721;R-HSA-909722;R-HSA-1015702;R-HSA-8985104;R-HSA-909718;R-HSA-1112587;R-HSA-1015699;R-HSA-6788346…
R-HSA-168256	Immune System	47	2662	0.188061	2.32e-09	2.3e-07	6.64	242	1527	0.126042	9606	Homo sapiens	ITGB2;KIF11;SAMHD1;ITGAL;IFIT3;PSMB6;PSMB7;LOC100513601;HK3;DHX58;GBP2;B2M;ZBP1;SLA-DQA1;RSAD2;DDX58;STAT1;MX2;MX1;TAP2;TAP1;ISG15;OLFM4;MTOR;TAPBP;ENAH;OAS1;OAS2;CD209;TRIM31;EIF4G3	31		R-HSA-936462;R-HSA-8983688;R-HSA-199169;R-HSA-1810457;R-HSA-202245;R-HSA-8983680;R-HSA-1112602;R-HSA-202248;R-HSA-8987266;R-HSA-1112604;R-HSA-2130478;R-HSA-8987270;R-HSA-936475;R-HSA-2130486;R-HSA-1112587;R-HSA-8950441;R-HSA-1031716;R-HSA-8863914;R-HSA-1031713;R-HSA-202291;R-HSA-2272795;R-HSA-8950453;R-HSA-202307;R-HSA-8951498;R-HSA-8951499;R-HSA-8951500;R-HSA-6800426;R-HSA-6800434;R-HSA-8950485;…
R-HSA-877300	Interferon gamma signaling	13	250	0.0176616	6.27e-08	4.95e-06	5.31	9	15	0.00123814	9606	Homo sapiens	LOC100513601;SLA-DQA1;OAS1;OAS2;STAT1;GBP2;TRIM31;B2M	8		R-HSA-873917;R-HSA-997326;R-HSA-873927;R-HSA-1031716;R-HSA-873921;R-HSA-877281;R-HSA-909552;R-HSA-1031713;R-HSA-873922
R-HSA-1169410	Antiviral mechanism by IFN-stimulated genes	8	94	0.00664076	6.88e-07	4.54e-05	4.34	23	31	0.00255881	9606	Homo sapiens	OAS1;OAS2;DDX58;STAT1;MX2;MX1;ISG15;EIF4G3	8		R-HSA-1678841;R-HSA-8985097;R-HSA-936462;R-HSA-8983688;R-HSA-1169395;R-HSA-1678843;R-HSA-1678842;R-HSA-1169394;R-HSA-1169397;R-HSA-1169399;R-HSA-1169398;R-HSA-8985153;R-HSA-8983680;R-HSA-1169307;R-HSA-1176059;R-HSA-1169403;R-HSA-1169402;R-HSA-1169405;R-HSA-1169404;R-HSA-1169406;R-HSA-8985104;R-HSA-8985138;R-HSA-8983671
R-HSA-1169408	ISG15 antiviral mechanism	6	83	0.00586365	4.43e-05	0.002524	2.6	16	16	0.00132068	9606	Homo sapiens	DDX58;STAT1;MX2;MX1;ISG15;EIF4G3	6		R-HSA-1678841;R-HSA-936462;R-HSA-1169395;R-HSA-1678843;R-HSA-1678842;R-HSA-1169394;R-HSA-1169397;R-HSA-1169399;R-HSA-1169398;R-HSA-1169307;R-HSA-1176059;R-HSA-1169403;R-HSA-1169402;R-HSA-1169405;R-HSA-1169404;R-HSA-1169406
R-HSA-8983711	OAS antiviral response	3	15	0.0010597	0.000217	0.0106575	1.97	7	15	0.00123814	9606	Homo sapiens	OAS1;OAS2;DDX58	3		R-HSA-8985097;R-HSA-8983688;R-HSA-8985153;R-HSA-8985104;R-HSA-8983680;R-HSA-8985138;R-HSA-8983671
R-HSA-1236974	ER-Phagosome pathway	7	165	0.0116567	0.000276	0.0121427	1.92	8	10	0.000825	9606	Homo sapiens	PSMB6;LOC100513601;PSMB7;TAP2;TAP1;B2M;TAPBP	7		R-HSA-8863973;R-HSA-8951595;R-HSA-8863858;R-HSA-1236935;R-HSA-1236965;R-HSA-1236949;R-HSA-1236971;R-HSA-8863914
R-HSA-1236975	Antigen processing-Cross presentation	7	187	0.0132109	0.000579	0.0225874	1.65	12	23	0.00189847	9606	Homo sapiens	PSMB6;LOC100513601;PSMB7;TAP2;TAP1;B2M;TAPBP	7		R-HSA-8863973;R-HSA-8951595;R-HSA-8863858;R-HSA-1236935;R-HSA-1236964;R-HSA-1236965;R-HSA-1236949;R-HSA-1236954;R-HSA-1236970;R-HSA-1236971;R-HSA-1236943;R-HSA-8863914
R-HSA-983170	Antigen Presentation: Folding, assembly and peptide loading of class I MHC	5	102	0.00720593	0.00112367	0.0404522	1.39	14	16	0.00132068	9606	Homo sapiens	LOC100513601;TAP2;TAP1;B2M;TAPBP	5		R-HSA-8951499;R-HSA-983148;R-HSA-983146;R-HSA-983145;R-HSA-983144;R-HSA-983142;R-HSA-983427;R-HSA-983426;R-HSA-983138;R-HSA-983425;R-HSA-983424;R-HSA-983422;R-HSA-983421;R-HSA-983161
R-HSA-8949275	RUNX3 Regulates Immune Response and Cell Migration	2	10	0.000706	0.00269416	0.0889074	1.05	2	5	0.000413	9606	Homo sapiens	ITGAL	1		R-HSA-8949343;R-HSA-8949335
R-HSA-9013694	Signaling by NOTCH4	4	92	0.00649947	0.00541643	0.162493	0.79	2	20	0.00165085	9606	Homo sapiens	ACTA2;PSMB6;PSMB7	3		R-HSA-9604642;R-HSA-9604664
R-HSA-1059683	Interleukin-6 signaling	2	17	0.00120099	0.00752322	0.195604	0.71	6	19	0.0015683	9606	Homo sapiens	STAT1	1		R-HSA-1112565;R-HSA-1112727;R-HSA-1112602;R-HSA-1112538;R-HSA-1112587;R-HSA-1112604
R-HSA-8949664	Processing of SMDT1	2	17	0.00120099	0.00752322	0.195604	0.71	1	5	0.000413	9606	Homo sapiens	PMPCB;PMPCA	2		R-HSA-8949649
R-HSA-1280218	Adaptive Immune System	15	998	0.0705051	0.00820171	0.196841	0.71	84	261	0.0215435	9606	Homo sapiens	SLA-DQA1;ITGB2;TAP2;TAP1;KIF11;ITGAL;MTOR;TAPBP;PSMB6;ENAH;LOC100513601;PSMB7;CD209;B2M	14		R-HSA-199043;R-HSA-2130336;R-HSA-199169;R-HSA-199558;R-HSA-2130725;R-HSA-202245;R-HSA-199050;R-HSA-202248;R-HSA-2130731;R-HSA-983427;R-HSA-199566;R-HSA-983426;R-HSA-2130349;R-HSA-983425;R-HSA-2130478;R-HSA-983424;R-HSA-8850326;R-HSA-1168640;R-HSA-199062;R-HSA-2130486;R-HSA-199579;R-HSA-199576;R-HSA-2130619;R-HSA-199583;R-HSA-199587;R-HSA-2213248;R-HSA-8951595;R-HSA-198955;R-HSA-198958;R-HSA-88639…
R-HSA-376176	Signaling by ROBO receptors	6	235	0.0166019	0.00911385	0.209619	0.68	5	60	0.00495254	9606	Homo sapiens	PSMB6;ENAH;PSMB7;RPS25;RPL36A	5		R-HSA-428534;R-HSA-9014652;R-HSA-9011313;R-HSA-376140;R-HSA-9014610
R-HSA-8878159	Transcriptional regulation by RUNX3	4	118	0.00833628	0.0126405	0.216514	0.66	3	47	0.00387949	9606	Homo sapiens	PSMB6;PSMB7;ITGAL	3		R-HSA-8952408;R-HSA-8949343;R-HSA-8949335
R-HSA-9010553	Regulation of expression of SLITs and ROBOs	5	183	0.0129283	0.0129595	0.216514	0.66	3	20	0.00165085	9606	Homo sapiens	PSMB6;PSMB7;RPS25;RPL36A	4		R-HSA-9014652;R-HSA-9011313;R-HSA-9014610
R-HSA-1799339	SRP-dependent cotranslational protein targeting to membrane	4	119	0.00840692	0.0130005	0.216514	0.66	5	5	0.000413	9606	Homo sapiens	RPS25;SPCS2;RPL36A	3		R-HSA-1799326;R-HSA-1799330;R-HSA-1799329;R-HSA-1799335;R-HSA-1799332
R-HSA-5657560	Hereditary fructose intolerance	1	2	0.000141	0.0150057	0.216514	0.66	1	1	8.25e-05	9606	Homo sapiens	ALDOB	1		R-HSA-5656438
R-HSA-9013695	NOTCH4 Intracellular Domain Regulates Transcription	2	26	0.00183681	0.0168408	0.216514	0.66	1	9	0.000743	9606	Homo sapiens	ACTA2	1		R-HSA-9604664
R-HSA-8949215	Mitochondrial calcium ion transport	2	27	0.00190745	0.0180729	0.216514	0.66	1	10	0.000825	9606	Homo sapiens	PMPCB;PMPCA	2		R-HSA-8949649
R-HSA-912694	Regulation of IFNA signaling	2	28	0.0019781	0.019342	0.216514	0.66	1	5	0.000413	9606	Homo sapiens	STAT1	1		R-HSA-997309
R-HSA-6783589	Interleukin-6 family signaling	2	30	0.00211939	0.021989	0.216514	0.66	6	33	0.0027239	9606	Homo sapiens	STAT1	1		R-HSA-1112565;R-HSA-1112727;R-HSA-1112602;R-HSA-1112538;R-HSA-1112587;R-HSA-1112604
R-HSA-9603505	NTRK3 as a dependence receptor	1	3	0.000212	0.0224246	0.216514	0.66	3	4	0.00033	9606	Homo sapiens	NELFB	1		R-HSA-9603554;R-HSA-9603598;R-HSA-9603548
R-HSA-202403	TCR signaling	4	146	0.0103144	0.0252823	0.216514	0.66	15	52	0.0042922	9606	Homo sapiens	PSMB6;ENAH;PSMB7;SLA-DQA1	4		R-HSA-202307;R-HSA-202214;R-HSA-202245;R-HSA-202248;R-HSA-202216;R-HSA-202344;R-HSA-8852200;R-HSA-202291;R-HSA-8855381;R-HSA-202165;R-HSA-5607724;R-HSA-202233;R-HSA-202168;R-HSA-202174;R-HSA-430201
R-HSA-8939902	Regulation of RUNX2 expression and activity	3	83	0.00586365	0.0254853	0.216514	0.66	6	32	0.00264135	9606	Homo sapiens	PSMB6;PSMB7;STAT1	3		R-HSA-8939801;R-HSA-9008475;R-HSA-9008015;R-HSA-9007999;R-HSA-9008110;R-HSA-9009362
R-HSA-888590	GABA synthesis, release, reuptake and degradation	2	35	0.00247262	0.029212	0.216514	0.66	3	9	0.000743	9606	Homo sapiens	STXBP1;ABAT	2		R-HSA-888589;R-HSA-916855;R-HSA-917744
R-HSA-936440	Negative regulators of DDX58/IFIH1 signaling	2	36	0.00254327	0.0307558	0.216514	0.66	10	13	0.00107305	9606	Homo sapiens	DDX58;ISG15	2		R-HSA-936462;R-HSA-990526;R-HSA-937343;R-HSA-936412;R-HSA-936381;R-HSA-936378;R-HSA-936475;R-HSA-936390;R-HSA-936563;R-HSA-990528
R-HSA-168928	DDX58/IFIH1-mediated induction of interferon-alpha/beta	3	96	0.00678206	0.0367869	0.216514	0.66	29	46	0.00379695	9606	Homo sapiens	DDX58;DHX58;ISG15	3		R-HSA-936462;R-HSA-936390;R-HSA-168909;R-HSA-990528;R-HSA-936412;R-HSA-933532;R-HSA-933530;R-HSA-936475;R-HSA-918232;R-HSA-933528;R-HSA-933526;R-HSA-918230;R-HSA-933527;R-HSA-918229;R-HSA-933525;R-HSA-918227;R-HSA-933523;R-HSA-918224;R-HSA-918225;R-HSA-168934;R-HSA-168935;R-HSA-933538;R-HSA-933539;R-HSA-933537;R-HSA-990526;R-HSA-937343;R-HSA-936381;R-HSA-936378;R-HSA-936563
R-HSA-156902	Peptide chain elongation	3	97	0.0068527	0.0377467	0.216514	0.66	4	5	0.000413	9606	Homo sapiens	RPS25;RPL36A	2		R-HSA-156915;R-HSA-156912;R-HSA-156923;R-HSA-156907
R-HSA-5689603	UCH proteinases	3	98	0.00692335	0.0387193	0.216514	0.66	3	11	0.000908	9606	Homo sapiens	PSMB6;PSMB7;NEDD8	3		R-HSA-5665854;R-HSA-5665871;R-HSA-5690808
R-HSA-975956	Nonsense Mediated Decay (NMD) independent of the Exon Junction Complex (EJC)	3	101	0.00713529	0.0417134	0.216514	0.66	1	1	8.25e-05	9606	Homo sapiens	RPS25;RPL36A	2		R-HSA-927789
R-HSA-156842	Eukaryotic Translation Elongation	3	102	0.00720593	0.0427368	0.216514	0.66	4	9	0.000743	9606	Homo sapiens	RPS25;RPL36A	2		R-HSA-156915;R-HSA-156912;R-HSA-156923;R-HSA-156907
R-HSA-157118	Signaling by NOTCH	5	257	0.0181561	0.0460299	0.216514	0.66	6	152	0.0125464	9606	Homo sapiens	ACTA2;PSMB6;PSMB7;STAT1	4		R-HSA-9604642;R-HSA-9021325;R-HSA-9013567;R-HSA-9014129;R-HSA-9604664;R-HSA-9021334
R-HSA-72689	Formation of a pool of free 40S subunits	3	106	0.00748852	0.0469553	0.216514	0.66	2	2	0.000165	9606	Homo sapiens	RPS25;RPL36A	2		R-HSA-72673;R-HSA-72676
R-HSA-72764	Eukaryotic Translation Termination	3	106	0.00748852	0.0469553	0.216514	0.66	3	5	0.000413	9606	Homo sapiens	RPS25;RPL36A	2		R-HSA-141671;R-HSA-141691;R-HSA-141673
R-HSA-5687128	MAPK6/MAPK4 signaling	3	106	0.00748852	0.0469553	0.216514	0.66	3	40	0.00330169	9606	Homo sapiens	PSMB6;ZBP1;PSMB7	3		R-HSA-5687079;R-HSA-5687105;R-HSA-5687112
R-HSA-1606341	IRF3 mediated activation of type 1 IFN	1	7	0.000495	0.051551	0.216514	0.66	3	5	0.000413	9606	Homo sapiens	ZBP1	1		R-HSA-1606345;R-HSA-1606324;R-HSA-1606327
R-HSA-5663205	Infectious disease	8	540	0.0381491	0.0525928	0.216514	0.66	32	329	0.0271564	9606	Homo sapiens	PSMB6;PSMB7;RPS25;RPL36A;ISG15;NELFB;B2M	7		R-HSA-192704;R-HSA-182279;R-HSA-192841;R-HSA-182286;R-HSA-167181;R-HSA-170706;R-HSA-170704;R-HSA-167191;R-HSA-167192;R-HSA-167196;R-HSA-180573;R-HSA-167197;R-HSA-182243;R-HSA-167459;R-HSA-167076;R-HSA-167077;R-HSA-167147;R-HSA-1176059;R-HSA-167150;R-HSA-167087;R-HSA-167148;R-HSA-167084;R-HSA-167085;R-HSA-167090;R-HSA-167282;R-HSA-167478;R-HSA-182263;R-HSA-167284;R-HSA-180603;R-HSA-167288;R-HSA-16…
R-HSA-211733	Regulation of activated PAK-2p34 by proteasome mediated degradation	2	50	0.00353232	0.0554557	0.216514	0.66	1	2	0.000165	9606	Homo sapiens	PSMB6;PSMB7	2		R-HSA-211715
R-HSA-1433557	Signaling by SCF-KIT	2	50	0.00353232	0.0554557	0.216514	0.66	4	36	0.00297152	9606	Homo sapiens	STAT1	1		R-HSA-1433456;R-HSA-1470012;R-HSA-1470010;R-HSA-1470009
R-HSA-192823	Viral mRNA Translation	3	114	0.00805369	0.0559829	0.216514	0.66	2	2	0.000165	9606	Homo sapiens	RPS25;RPL36A	2		R-HSA-192704;R-HSA-192841
R-HSA-2408557	Selenocysteine synthesis	3	114	0.00805369	0.0559829	0.216514	0.66	2	7	0.000578	9606	Homo sapiens	RPS25;RPL36A	2		R-HSA-2408529;R-HSA-5333615
R-HSA-8856825	Cargo recognition for clathrin-mediated endocytosis	3	115	0.00812434	0.0571656	0.216514	0.66	6	14	0.00115559	9606	Homo sapiens	GPS1;NEDD8;EPN1	3		R-HSA-8866279;R-HSA-8866275;R-HSA-8863727;R-HSA-8863723;R-HSA-8866283;R-HSA-8863721
R-HSA-350562	Regulation of ornithine decarboxylase (ODC)	2	52	0.00367361	0.059408	0.216514	0.66	1	4	0.00033	9606	Homo sapiens	PSMB6;PSMB7	2		R-HSA-353125
R-HSA-180534	Vpu mediated degradation of CD4	2	53	0.00374426	0.0614198	0.216514	0.66	1	5	0.000413	9606	Homo sapiens	PSMB6;PSMB7	2		R-HSA-180573
R-HSA-1236978	Cross-presentation of soluble exogenous antigens (endosomes)	2	53	0.00374426	0.0614198	0.216514	0.66	1	6	0.000495	9606	Homo sapiens	PSMB6;PSMB7	2		R-HSA-1236970
R-HSA-983169	Class I MHC mediated antigen processing & presentation	7	465	0.0328506	0.0632201	0.216514	0.66	27	48	0.00396203	9606	Homo sapiens	PSMB6;LOC100513601;PSMB7;TAP2;TAP1;B2M;TAPBP	7		R-HSA-8951499;R-HSA-1236949;R-HSA-1236954;R-HSA-983427;R-HSA-983426;R-HSA-983425;R-HSA-983424;R-HSA-1236935;R-HSA-1236943;R-HSA-983150;R-HSA-8863973;R-HSA-8951595;R-HSA-983148;R-HSA-983146;R-HSA-983145;R-HSA-983144;R-HSA-983142;R-HSA-983138;R-HSA-8863914;R-HSA-983422;R-HSA-983421;R-HSA-8863858;R-HSA-1236964;R-HSA-983161;R-HSA-1236965;R-HSA-1236970;R-HSA-1236971
R-HSA-72706	GTP hydrolysis and joining of the 60S ribosomal subunit	3	120	0.00847757	0.0632561	0.216514	0.66	3	3	0.000248	9606	Homo sapiens	RPS25;RPL36A	2		R-HSA-72672;R-HSA-72619;R-HSA-72671
R-HSA-156827	L13a-mediated translational silencing of Ceruloplasmin expression	3	120	0.00847757	0.0632561	0.216514	0.66	2	3	0.000248	9606	Homo sapiens	RPS25;RPL36A	2		R-HSA-156823;R-HSA-156826
R-HSA-72695	Formation of the ternary complex, and subsequently, the 43S complex	2	54	0.00381491	0.0634547	0.216514	0.66	1	3	0.000248	9606	Homo sapiens	RPS25	1		R-HSA-72691
R-HSA-69610	p53-Independent DNA Damage Response	2	54	0.00381491	0.0634547	0.216514	0.66	1	4	0.00033	9606	Homo sapiens	PSMB6;PSMB7	2		R-HSA-69600
R-HSA-69613	p53-Independent G1/S DNA damage checkpoint	2	54	0.00381491	0.0634547	0.216514	0.66	1	4	0.00033	9606	Homo sapiens	PSMB6;PSMB7	2		R-HSA-69600
R-HSA-69601	Ubiquitin Mediated Degradation of Phosphorylated Cdc25A	2	54	0.00381491	0.0634547	0.216514	0.66	1	4	0.00033	9606	Homo sapiens	PSMB6;PSMB7	2		R-HSA-69600
R-HSA-169911	Regulation of Apoptosis	2	54	0.00381491	0.0634547	0.216514	0.66	1	5	0.000413	9606	Homo sapiens	PSMB6;PSMB7	2		R-HSA-211715
R-HSA-349425	Autodegradation of the E3 ubiquitin ligase COP1	2	54	0.00381491	0.0634547	0.216514	0.66	1	5	0.000413	9606	Homo sapiens	PSMB6;PSMB7	2		R-HSA-264458
R-HSA-75815	Ubiquitin-dependent degradation of Cyclin D	2	54	0.00381491	0.0634547	0.216514	0.66	1	5	0.000413	9606	Homo sapiens	PSMB6;PSMB7	2		R-HSA-75825
R-HSA-168254	Influenza Infection	4	199	0.0140586	0.064842	0.216514	0.66	3	59	0.00487	9606	Homo sapiens	RPS25;RPL36A;ISG15	3		R-HSA-192704;R-HSA-1176059;R-HSA-192841
R-HSA-445355	Smooth Muscle Contraction	2	55	0.00388555	0.0655123	0.216514	0.66	4	11	0.000908	9606	Homo sapiens	ACTA2	1		R-HSA-445700;R-HSA-445699;R-HSA-445704;R-HSA-445705
R-HSA-8854050	FBXL7 down-regulates AURKA during mitotic entry and in early mitosis	2	55	0.00388555	0.0655123	0.216514	0.66	2	6	0.000495	9606	Homo sapiens	PSMB6;PSMB7	2		R-HSA-8854071;R-HSA-8854044
R-HSA-174113	SCF-beta-TrCP mediated degradation of Emi1	2	55	0.00388555	0.0655123	0.216514	0.66	1	3	0.000248	9606	Homo sapiens	PSMB6;PSMB7	2		R-HSA-174203
R-HSA-450408	AUF1 (hnRNP D0) binds and destabilizes mRNA	2	56	0.0039562	0.067592	0.216514	0.66	1	4	0.00033	9606	Homo sapiens	PSMB6;PSMB7	2		R-HSA-450466
R-HSA-180585	Vif-mediated degradation of APOBEC3G	2	56	0.0039562	0.067592	0.216514	0.66	1	4	0.00033	9606	Homo sapiens	PSMB6;PSMB7	2		R-HSA-180603
R-HSA-2453902	The canonical retinoid cycle in rods (twilight vision)	2	56	0.0039562	0.067592	0.216514	0.66	2	25	0.00206356	9606	Homo sapiens	RDH11	1		R-HSA-2464822;R-HSA-74872
R-HSA-5688426	Deubiquitination	5	288	0.0203462	0.0680441	0.216514	0.66	10	77	0.00635576	9606	Homo sapiens	PSMB6;PSMB7;DDX58;NEDD8;MAT2B	5		R-HSA-5696564;R-HSA-936381;R-HSA-5689539;R-HSA-5665854;R-HSA-936390;R-HSA-5665871;R-HSA-5690159;R-HSA-5690808;R-HSA-5696872;R-HSA-5696600
R-HSA-927802	Nonsense-Mediated Decay (NMD)	3	124	0.00876016	0.0683366	0.216514	0.66	5	6	0.000495	9606	Homo sapiens	RPS25;RPL36A	2		R-HSA-927836;R-HSA-927789;R-HSA-927832;R-HSA-927813;R-HSA-927889
R-HSA-975957	Nonsense Mediated Decay (NMD) enhanced by the Exon Junction Complex (EJC)	3	124	0.00876016	0.0683366	0.216514	0.66	4	5	0.000413	9606	Homo sapiens	RPS25;RPL36A	2		R-HSA-927836;R-HSA-927832;R-HSA-927813;R-HSA-927889
R-HSA-202424	Downstream TCR signaling	3	124	0.00876016	0.0683366	0.216514	0.66	2	24	0.00198102	9606	Homo sapiens	PSMB6;PSMB7;SLA-DQA1	3		R-HSA-202307;R-HSA-5607724
R-HSA-4641258	Degradation of DVL	2	57	0.00402685	0.0696935	0.216514	0.66	2	7	0.000578	9606	Homo sapiens	PSMB6;PSMB7	2		R-HSA-1504193;R-HSA-4641260
R-HSA-4641257	Degradation of AXIN	2	57	0.00402685	0.0696935	0.216514	0.66	2	8	0.00066	9606	Homo sapiens	PSMB6;PSMB7	2		R-HSA-3640874;R-HSA-4641256
R-HSA-9604323	Negative regulation of NOTCH4 signaling	2	57	0.00402685	0.0696935	0.216514	0.66	1	6	0.000495	9606	Homo sapiens	PSMB6;PSMB7	2		R-HSA-9604642
R-HSA-8941858	Regulation of RUNX3 expression and activity	2	57	0.00402685	0.0696935	0.216514	0.66	1	9	0.000743	9606	Homo sapiens	PSMB6;PSMB7	2		R-HSA-8952408
R-HSA-5689880	Ub-specific processing proteases	4	206	0.0145532	0.0716172	0.216514	0.66	6	40	0.00330169	9606	Homo sapiens	PSMB6;PSMB7;DDX58;MAT2B	4		R-HSA-5696564;R-HSA-5689539;R-HSA-936390;R-HSA-5690159;R-HSA-5696872;R-HSA-5696600
R-HSA-202433	Generation of second messenger molecules	2	58	0.00409749	0.0718164	0.216514	0.66	4	17	0.00140322	9606	Homo sapiens	ENAH;SLA-DQA1	2		R-HSA-202245;R-HSA-202248;R-HSA-202216;R-HSA-430201
R-HSA-68827	CDT1 association with the CDC6:ORC:origin complex	2	59	0.00416814	0.0739601	0.216514	0.66	1	3	0.000248	9606	Homo sapiens	PSMB6;PSMB7	2		R-HSA-68825
R-HSA-69541	Stabilization of p53	2	59	0.00416814	0.0739601	0.216514	0.66	1	15	0.00123814	9606	Homo sapiens	PSMB6;PSMB7	2		R-HSA-264458
R-HSA-72613	Eukaryotic Translation Initiation	3	130	0.00918403	0.0762941	0.216514	0.66	12	21	0.00173339	9606	Homo sapiens	RPS25;RPL36A	2		R-HSA-72673;R-HSA-72672;R-HSA-72691;R-HSA-72676;R-HSA-156823;R-HSA-72697;R-HSA-156826;R-HSA-72619;R-HSA-156808;R-HSA-157849;R-HSA-72621;R-HSA-72671
R-HSA-72737	Cap-dependent Translation Initiation	3	130	0.00918403	0.0762941	0.216514	0.66	10	18	0.00148576	9606	Homo sapiens	RPS25;RPL36A	2		R-HSA-72673;R-HSA-72672;R-HSA-72691;R-HSA-72676;R-HSA-72697;R-HSA-72619;R-HSA-156808;R-HSA-157849;R-HSA-72621;R-HSA-72671
R-HSA-6785807	Interleukin-4 and Interleukin-13 signaling	4	211	0.0149064	0.0766708	0.216514	0.66	7	46	0.00379695	9606	Homo sapiens	STAT1;ITGB2	2		R-HSA-6788582;R-HSA-6788628;R-HSA-6788623;R-HSA-6788622;R-HSA-6788571;R-HSA-6788346;R-HSA-6790041
R-HSA-5362768	Hh mutants that don't undergo autocatalytic processing are degraded by ERAD	2	61	0.00430943	0.0783086	0.216514	0.66	1	6	0.000495	9606	Homo sapiens	PSMB6;PSMB7	2		R-HSA-5387392
R-HSA-5676590	NIK-->noncanonical NF-kB signaling	2	61	0.00430943	0.0783086	0.216514	0.66	1	9	0.000743	9606	Homo sapiens	PSMB6;PSMB7	2		R-HSA-5607731
R-HSA-164940	Nef mediated downregulation of MHC class I complex cell surface expression	1	11	0.000777	0.0798174	0.216514	0.66	4	4	0.00033	9606	Homo sapiens	B2M	1		R-HSA-182243;R-HSA-182279;R-HSA-182263;R-HSA-182286
R-HSA-8985947	Interleukin-9 signaling	1	11	0.000777	0.0798174	0.216514	0.66	6	12	0.000991	9606	Homo sapiens	STAT1	1		R-HSA-8985929;R-HSA-8985981;R-HSA-8985900;R-HSA-8985966;R-HSA-8985988;R-HSA-8985943
R-HSA-916853	Degradation of GABA	1	11	0.000777	0.0798174	0.216514	0.66	1	2	0.000165	9606	Homo sapiens	ABAT	1		R-HSA-916855
R-HSA-72649	Translation initiation complex formation	2	62	0.00438008	0.0805124	0.216514	0.66	2	2	0.000165	9606	Homo sapiens	RPS25	1		R-HSA-156808;R-HSA-157849
R-HSA-5610780	Degradation of GLI1 by the proteasome	2	62	0.00438008	0.0805124	0.216514	0.66	2	6	0.000495	9606	Homo sapiens	PSMB6;PSMB7	2		R-HSA-5610758;R-HSA-5610760
R-HSA-5610783	Degradation of GLI2 by the proteasome	2	62	0.00438008	0.0805124	0.216514	0.66	1	5	0.000413	9606	Homo sapiens	PSMB6;PSMB7	2		R-HSA-5610757
R-HSA-5610785	GLI3 is processed to GLI3R by the proteasome	2	62	0.00438008	0.0805124	0.216514	0.66	1	5	0.000413	9606	Homo sapiens	PSMB6;PSMB7	2		R-HSA-5610754
R-HSA-187577	SCF(Skp2)-mediated degradation of p27/p21	2	62	0.00438008	0.0805124	0.216514	0.66	1	7	0.000578	9606	Homo sapiens	PSMB6;PSMB7	2		R-HSA-187574
R-HSA-174084	Autodegradation of Cdh1 by Cdh1:APC/C	2	63	0.00445072	0.0827355	0.216514	0.66	1	2	0.000165	9606	Homo sapiens	PSMB6;PSMB7	2		R-HSA-174058
R-HSA-72702	Ribosomal scanning and start codon recognition	2	64	0.00452137	0.0849774	0.216514	0.66	2	2	0.000165	9606	Homo sapiens	RPS25	1		R-HSA-72697;R-HSA-72621
R-HSA-5387390	Hh mutants abrogate ligand secretion	2	64	0.00452137	0.0849774	0.216514	0.66	1	7	0.000578	9606	Homo sapiens	PSMB6;PSMB7	2		R-HSA-5387392
R-HSA-9020958	Interleukin-21 signaling	1	12	0.000848	0.0867526	0.216514	0.66	2	5	0.000413	9606	Homo sapiens	STAT1	1		R-HSA-9006873;R-HSA-9006870
R-HSA-8851680	Butyrophilin (BTN) family interactions	1	12	0.000848	0.0867526	0.216514	0.66	1	8	0.00066	9606	Homo sapiens	CD209	1		R-HSA-8851018
R-HSA-72662	Activation of the mRNA upon binding of the cap-binding complex and eIFs, and subsequent binding to 43S	2	66	0.00466266	0.0895159	0.216514	0.66	2	6	0.000495	9606	Homo sapiens	RPS25	1		R-HSA-156808;R-HSA-157849
R-HSA-4608870	Asymmetric localization of PCP proteins	2	66	0.00466266	0.0895159	0.216514	0.66	1	7	0.000578	9606	Homo sapiens	PSMB6;PSMB7	2		R-HSA-4608855
R-HSA-5607761	Dectin-1 mediated noncanonical NF-kB signaling	2	66	0.00466266	0.0895159	0.216514	0.66	1	9	0.000743	9606	Homo sapiens	PSMB6;PSMB7	2		R-HSA-5607731
R-HSA-174154	APC/C:Cdc20 mediated degradation of Securin	2	67	0.00473331	0.0918118	0.216514	0.66	1	3	0.000248	9606	Homo sapiens	PSMB6;PSMB7	2		R-HSA-174202
R-HSA-5678895	Defective CFTR causes cystic fibrosis	2	67	0.00473331	0.0918118	0.216514	0.66	1	7	0.000578	9606	Homo sapiens	PSMB6;PSMB7	2		R-HSA-8866858
R-HSA-70326	Glucose metabolism	3	142	0.0100318	0.0933619	0.216514	0.66	4	50	0.00412711	9606	Homo sapiens	HK3;ALDOB;FBP1	3		R-HSA-70420;R-HSA-71495;R-HSA-71496;R-HSA-70479
R-HSA-933543	NF-kB activation through FADD/RIP-1 pathway mediated by caspase-8 and -10	1	13	0.000918	0.093636	0.216514	0.66	5	5	0.000413	9606	Homo sapiens	DDX58	1		R-HSA-933532;R-HSA-168934;R-HSA-933526;R-HSA-933539;R-HSA-933523
R-HSA-428359	Insulin-like Growth Factor-2 mRNA Binding Proteins (IGF2BPs/IMPs/VICKZs) bind RNA	1	13	0.000918	0.093636	0.216514	0.66	1	3	0.000248	9606	Homo sapiens	ZBP1	1		R-HSA-428296
R-HSA-9020956	Interleukin-27 signaling	1	13	0.000918	0.093636	0.216514	0.66	5	20	0.00165085	9606	Homo sapiens	STAT1	1		R-HSA-8950441;R-HSA-8950733;R-HSA-8950782;R-HSA-8950485;R-HSA-8950518
R-HSA-68867	Assembly of the pre-replicative complex	2	68	0.00480396	0.0941249	0.216514	0.66	1	12	0.000991	9606	Homo sapiens	PSMB6;PSMB7	2		R-HSA-68825
R-HSA-70263	Gluconeogenesis	2	68	0.00480396	0.0941249	0.216514	0.66	2	26	0.0021461	9606	Homo sapiens	ALDOB;FBP1	2		R-HSA-71495;R-HSA-70479
R-HSA-351202	Metabolism of polyamines	3	144	0.0101731	0.0963487	0.216514	0.66	2	38	0.00313661	9606	Homo sapiens	PSMB6;PSMB7;ASS1	3		R-HSA-70577;R-HSA-353125
R-HSA-1268020	Mitochondrial protein import	2	69	0.0048746	0.0964549	0.216514	0.66	2	14	0.00115559	9606	Homo sapiens	PMPCB;PMPCA	2		R-HSA-1299478;R-HSA-1299476
R-HSA-163841	Gamma carboxylation, hypusine formation and arylsulfatase activation	2	69	0.0048746	0.0964549	0.216514	0.66	2	39	0.00321915	9606	Homo sapiens	FN3KRP	1		R-HSA-6788855;R-HSA-6788867
R-HSA-5658442	Regulation of RAS by GAPs	2	70	0.00494525	0.0988013	0.216514	0.66	1	5	0.000413	9606	Homo sapiens	PSMB6;PSMB7	2		R-HSA-5658430
R-HSA-1234176	Oxygen-dependent proline hydroxylation of Hypoxia-inducible Factor Alpha	2	70	0.00494525	0.0988013	0.216514	0.66	1	12	0.000991	9606	Homo sapiens	PSMB6;PSMB7	2		R-HSA-1234159
R-HSA-69580	p53-Dependent G1/S DNA damage checkpoint	2	70	0.00494525	0.0988013	0.216514	0.66	1	22	0.00181593	9606	Homo sapiens	PSMB6;PSMB7	2		R-HSA-264458
R-HSA-69563	p53-Dependent G1 DNA Damage Response	2	70	0.00494525	0.0988013	0.216514	0.66	1	22	0.00181593	9606	Homo sapiens	PSMB6;PSMB7	2		R-HSA-264458
R-HSA-1483226	Synthesis of PI	1	14	0.000989	0.100468	0.216514	0.66	1	3	0.000248	9606	Homo sapiens	CDIPT	1		R-HSA-1482976
R-HSA-8878166	Transcriptional regulation by RUNX2	3	147	0.010385	0.100902	0.216514	0.66	6	84	0.00693355	9606	Homo sapiens	PSMB6;PSMB7;STAT1	3		R-HSA-8939801;R-HSA-9008475;R-HSA-9008015;R-HSA-9007999;R-HSA-9008110;R-HSA-9009362
R-HSA-2132295	MHC class II antigen presentation	3	148	0.0104557	0.102438	0.216514	0.66	24	26	0.0021461	9606	Homo sapiens	SLA-DQA1;KIF11;B2M	3		R-HSA-2130336;R-HSA-2213248;R-HSA-8951498;R-HSA-2130500;R-HSA-8951500;R-HSA-2130725;R-HSA-2130504;R-HSA-2130378;R-HSA-2130731;R-HSA-2130349;R-HSA-2130478;R-HSA-2130640;R-HSA-2130641;R-HSA-2213235;R-HSA-2213236;R-HSA-2130486;R-HSA-2213239;R-HSA-2213241;R-HSA-2130393;R-HSA-8856157;R-HSA-2213243;R-HSA-2130619;R-HSA-2213244;R-HSA-2213246
R-HSA-174178	APC/C:Cdh1 mediated degradation of Cdc20 and other APC/C:Cdh1 targeted proteins in late mitosis/early G1	2	72	0.00508654	0.103542	0.216514	0.66	2	4	0.00033	9606	Homo sapiens	PSMB6;PSMB7	2		R-HSA-174105;R-HSA-188191
R-HSA-174184	Cdc20:Phospho-APC/C mediated degradation of Cyclin A	2	72	0.00508654	0.103542	0.216514	0.66	1	3	0.000248	9606	Homo sapiens	PSMB6;PSMB7	2		R-HSA-174255
R-HSA-1169091	Activation of NF-kappaB in B cells	2	72	0.00508654	0.103542	0.216514	0.66	1	10	0.000825	9606	Homo sapiens	PSMB6;PSMB7	2		R-HSA-1168640
R-HSA-69615	G1/S DNA Damage Checkpoints	2	72	0.00508654	0.103542	0.216514	0.66	2	26	0.0021461	9606	Homo sapiens	PSMB6;PSMB7	2		R-HSA-69600;R-HSA-264458
R-HSA-5358346	Hedgehog ligand biogenesis	2	72	0.00508654	0.103542	0.216514	0.66	1	15	0.00123814	9606	Homo sapiens	PSMB6;PSMB7	2		R-HSA-5362448
R-HSA-162909	Host Interactions of HIV factors	3	150	0.010597	0.10554	0.216514	0.66	6	54	0.00445728	9606	Homo sapiens	PSMB6;PSMB7;B2M	3		R-HSA-182243;R-HSA-182279;R-HSA-182263;R-HSA-180603;R-HSA-182286;R-HSA-180573
R-HSA-68949	Orc1 removal from chromatin	2	73	0.00515719	0.105936	0.216514	0.66	1	4	0.00033	9606	Homo sapiens	PSMB6;PSMB7	2		R-HSA-68948
R-HSA-179419	APC:Cdc20 mediated degradation of cell cycle proteins prior to satisfation of the cell cycle checkpoint	2	73	0.00515719	0.105936	0.216514	0.66	1	6	0.000495	9606	Homo sapiens	PSMB6;PSMB7	2		R-HSA-174255
R-HSA-69017	CDK-mediated phosphorylation and removal of Cdc6	2	74	0.00522784	0.108344	0.216514	0.66	1	4	0.00033	9606	Homo sapiens	PSMB6;PSMB7	2		R-HSA-69016
R-HSA-8948751	Regulation of PTEN stability and activity	2	74	0.00522784	0.108344	0.216514	0.66	1	13	0.00107305	9606	Homo sapiens	PSMB6;PSMB7	2		R-HSA-8850992
R-HSA-8951664	Neddylation	4	241	0.0170258	0.110571	0.216514	0.66	25	31	0.00255881	9606	Homo sapiens	PSMB6;PSMB7;GPS1;NEDD8	4		R-HSA-8956040;R-HSA-8956106;R-HSA-8956045;R-HSA-8956099;R-HSA-8951751;R-HSA-8956103;R-HSA-8956184;R-HSA-8951644;R-HSA-8956050;R-HSA-8951764;R-HSA-8951766;R-HSA-8951656;R-HSA-8952618;R-HSA-8956140;R-HSA-8952044;R-HSA-8952620;R-HSA-8951661;R-HSA-8951648;R-HSA-5690808;R-HSA-8952039;R-HSA-8956025;R-HSA-8956026;R-HSA-8952638;R-HSA-8952639;R-HSA-8956031
R-HSA-176409	APC/C:Cdc20 mediated degradation of mitotic proteins	2	75	0.00529848	0.110767	0.216514	0.66	2	13	0.00107305	9606	Homo sapiens	PSMB6;PSMB7	2		R-HSA-174202;R-HSA-174255
R-HSA-176814	Activation of APC/C and APC/C:Cdc20 mediated degradation of mitotic proteins	2	76	0.00536913	0.113205	0.216514	0.66	2	15	0.00123814	9606	Homo sapiens	PSMB6;PSMB7	2		R-HSA-174202;R-HSA-174255
R-HSA-877312	Regulation of IFNG signaling	1	16	0.00113034	0.113979	0.216514	0.66	2	4	0.00033	9606	Homo sapiens	STAT1	1		R-HSA-997326;R-HSA-877281
R-HSA-8984722	Interleukin-35 Signalling	1	16	0.00113034	0.113979	0.216514	0.66	12	26	0.0021461	9606	Homo sapiens	STAT1	1		R-HSA-8983835;R-HSA-8950522;R-HSA-8983996;R-HSA-8983983;R-HSA-8984014;R-HSA-8983841;R-HSA-8984963;R-HSA-8984021;R-HSA-8983845;R-HSA-8950453;R-HSA-8984964;R-HSA-8984023
R-HSA-72766	Translation	5	339	0.0239491	0.114905	0.216514	0.66	25	99	0.00817169	9606	Homo sapiens	RPS25;SPCS2;WARS;RPL36A	4		R-HSA-1799326;R-HSA-156808;R-HSA-379977;R-HSA-156823;R-HSA-156826;R-HSA-157849;R-HSA-72671;R-HSA-72673;R-HSA-72672;R-HSA-72676;R-HSA-141671;R-HSA-156907;R-HSA-72619;R-HSA-141673;R-HSA-72621;R-HSA-156915;R-HSA-156912;R-HSA-72691;R-HSA-72697;R-HSA-156923;R-HSA-1799330;R-HSA-141691;R-HSA-1799329;R-HSA-1799335;R-HSA-1799332
R-HSA-918233	TRAF3-dependent IRF activation pathway	1	17	0.00120099	0.120659	0.216514	0.66	4	9	0.000743	9606	Homo sapiens	DDX58	1		R-HSA-918232;R-HSA-918229;R-HSA-918227;R-HSA-918225
R-HSA-8856828	Clathrin-mediated endocytosis	3	161	0.0113741	0.123238	0.216514	0.66	21	34	0.00280644	9606	Homo sapiens	GPS1;NEDD8;EPN1	3		R-HSA-8868071;R-HSA-8866279;R-HSA-8868230;R-HSA-8866275;R-HSA-8863727;R-HSA-8867756;R-HSA-8868236;R-HSA-8863723;R-HSA-8868651;R-HSA-8866283;R-HSA-8867754;R-HSA-8863721;R-HSA-8868072;R-HSA-8868648;R-HSA-8868661;R-HSA-8868660;R-HSA-8868659;R-HSA-8868658;R-HSA-8869438;R-HSA-8871194;R-HSA-8871193
R-HSA-1236977	Endosomal/Vacuolar pathway	2	82	0.00579301	0.12811	0.216514	0.66	3	4	0.00033	9606	Homo sapiens	LOC100513601;B2M	2		R-HSA-1236964;R-HSA-1236954;R-HSA-1236943
R-HSA-176408	Regulation of APC/C activators between G1/S and early anaphase	2	82	0.00579301	0.12811	0.216514	0.66	1	14	0.00115559	9606	Homo sapiens	PSMB6;PSMB7	2		R-HSA-174203
R-HSA-8852276	The role of GTSE1 in G2/M progression after G2 checkpoint	2	83	0.00586365	0.130638	0.216514	0.66	1	10	0.000825	9606	Homo sapiens	PSMB6;PSMB7	2		R-HSA-8852354
R-HSA-1234174	Cellular response to hypoxia	2	83	0.00586365	0.130638	0.216514	0.66	1	20	0.00165085	9606	Homo sapiens	PSMB6;PSMB7	2		R-HSA-1234159
R-HSA-1810476	RIP-mediated NFkB activation via ZBP1	1	19	0.00134228	0.13387	0.216514	0.66	2	4	0.00033	9606	Homo sapiens	ZBP1	1		R-HSA-1810457;R-HSA-168910
R-HSA-162906	HIV Infection	4	262	0.0185094	0.137661	0.216514	0.66	29	158	0.0130417	9606	Homo sapiens	PSMB6;PSMB7;NELFB;B2M	4		R-HSA-182279;R-HSA-182286;R-HSA-167181;R-HSA-170706;R-HSA-170704;R-HSA-167191;R-HSA-167192;R-HSA-167196;R-HSA-180573;R-HSA-167197;R-HSA-182243;R-HSA-167459;R-HSA-167076;R-HSA-167077;R-HSA-167147;R-HSA-167150;R-HSA-167087;R-HSA-167148;R-HSA-167084;R-HSA-167085;R-HSA-167090;R-HSA-167282;R-HSA-167478;R-HSA-182263;R-HSA-167284;R-HSA-180603;R-HSA-167288;R-HSA-167481;R-HSA-167292
R-HSA-216083	Integrin cell surface interactions	2	86	0.00607559	0.13829	0.216514	0.66	6	54	0.00445728	9606	Homo sapiens	ITGB2;ITGAL	2		R-HSA-216082;R-HSA-202704;R-HSA-202727;R-HSA-216069;R-HSA-199050;R-HSA-202718
R-HSA-6807070	PTEN Regulation	3	171	0.0120805	0.140198	0.216514	0.66	3	56	0.00462237	9606	Homo sapiens	PSMB6;PSMB7;MTOR	3		R-HSA-8944457;R-HSA-8850992;R-HSA-8944454
R-HSA-70350	Fructose catabolism	1	20	0.00141293	0.140402	0.216514	0.66	1	5	0.000413	9606	Homo sapiens	ALDOB	1		R-HSA-70342
R-HSA-69202	Cyclin E associated events during G1/S transition	2	88	0.00621688	0.143446	0.216514	0.66	1	20	0.00165085	9606	Homo sapiens	PSMB6;PSMB7	2		R-HSA-187574
R-HSA-69002	DNA Replication Pre-Initiation	2	88	0.00621688	0.143446	0.216514	0.66	1	21	0.00173339	9606	Homo sapiens	PSMB6;PSMB7	2		R-HSA-68825
R-HSA-3134975	Regulation of innate immune responses to cytosolic DNA	1	21	0.00148357	0.146885	0.216514	0.66	2	9	0.000743	9606	Homo sapiens	ZBP1	1		R-HSA-8948703;R-HSA-3249386
R-HSA-168273	Influenza Viral RNA Transcription and Replication	3	175	0.0123631	0.147194	0.216514	0.66	2	14	0.00115559	9606	Homo sapiens	RPS25;RPL36A	2		R-HSA-192704;R-HSA-192841
R-HSA-174143	APC/C-mediated degradation of cell cycle proteins	2	90	0.00635818	0.148642	0.216514	0.66	6	38	0.00313661	9606	Homo sapiens	PSMB6;PSMB7	2		R-HSA-174058;R-HSA-174202;R-HSA-174203;R-HSA-174105;R-HSA-188191;R-HSA-174255
R-HSA-453276	Regulation of mitotic cell cycle	2	90	0.00635818	0.148642	0.216514	0.66	6	38	0.00313661	9606	Homo sapiens	PSMB6;PSMB7	2		R-HSA-174058;R-HSA-174202;R-HSA-174203;R-HSA-174105;R-HSA-188191;R-HSA-174255
R-HSA-69656	Cyclin A:Cdk2-associated events at S phase entry	2	90	0.00635818	0.148642	0.216514	0.66	1	19	0.0015683	9606	Homo sapiens	PSMB6;PSMB7	2		R-HSA-187574
R-HSA-195253	Degradation of beta-catenin by the destruction complex	2	90	0.00635818	0.148642	0.216514	0.66	1	22	0.00181593	9606	Homo sapiens	PSMB6;PSMB7	2		R-HSA-2130282
R-HSA-164938	Nef-mediates down modulation of cell surface receptors by recruiting them to clathrin adapters	1	22	0.00155422	0.153319	0.216514	0.66	4	15	0.00123814	9606	Homo sapiens	B2M	1		R-HSA-182243;R-HSA-182279;R-HSA-182263;R-HSA-182286
R-HSA-400511	Synthesis, secretion, and inactivation of Glucose-dependent Insulinotropic Polypeptide (GIP)	1	22	0.00155422	0.153319	0.216514	0.66	1	7	0.000578	9606	Homo sapiens	SPCS2	1		R-HSA-400496
R-HSA-69052	Switching of origins to a post-replicative state	2	92	0.00649947	0.153876	0.216514	0.66	2	9	0.000743	9606	Homo sapiens	PSMB6;PSMB7	2		R-HSA-68948;R-HSA-69016
R-HSA-1168372	Downstream signaling events of B Cell Receptor (BCR)	2	92	0.00649947	0.153876	0.216514	0.66	1	14	0.00115559	9606	Homo sapiens	PSMB6;PSMB7	2		R-HSA-1168640
R-HSA-5632684	Hedgehog 'on' state	2	92	0.00649947	0.153876	0.216514	0.66	2	37	0.00305406	9606	Homo sapiens	PSMB6;PSMB7	2		R-HSA-5635868;R-HSA-5635854
R-HSA-6798695	Neutrophil degranulation	6	480	0.0339103	0.156484	0.216514	0.66	7	10	0.000825	9606	Homo sapiens	PSMB7;HK3;ITGB2;ITGAL;OLFM4;B2M	6		R-HSA-6799350;R-HSA-6800434;R-HSA-6798749;R-HSA-6798748;R-HSA-6798747;R-HSA-6800426;R-HSA-6798745
R-HSA-450531	Regulation of mRNA stability by proteins that bind AU-rich elements	2	93	0.00657012	0.156506	0.216514	0.66	1	26	0.0021461	9606	Homo sapiens	PSMB6;PSMB7	2		R-HSA-450466
R-HSA-2408522	Selenoamino acid metabolism	3	182	0.0128576	0.159704	0.216514	0.66	2	33	0.0027239	9606	Homo sapiens	RPS25;RPL36A	2		R-HSA-2408529;R-HSA-5333615
R-HSA-1606322	ZBP1(DAI) mediated induction of type I IFNs	1	23	0.00162487	0.159705	0.216514	0.66	6	10	0.000825	9606	Homo sapiens	ZBP1	1		R-HSA-1606345;R-HSA-1810457;R-HSA-1591234;R-HSA-168910;R-HSA-1606324;R-HSA-1606327
R-HSA-181429	Serotonin Neurotransmitter Release Cycle	1	23	0.00162487	0.159705	0.216514	0.66	2	4	0.00033	9606	Homo sapiens	STXBP1	1		R-HSA-380901;R-HSA-380905
R-HSA-388841	Costimulation by the CD28 family	2	97	0.0068527	0.167112	0.216514	0.66	2	34	0.00280644	9606	Homo sapiens	SLA-DQA1;MTOR	2		R-HSA-198640;R-HSA-389758
R-HSA-168255	Influenza Life Cycle	3	188	0.0132815	0.170678	0.216514	0.66	2	51	0.00420966	9606	Homo sapiens	RPS25;RPL36A	2		R-HSA-192704;R-HSA-192841
R-HSA-112310	Neurotransmitter release cycle	2	99	0.006994	0.172462	0.216514	0.66	13	36	0.00297152	9606	Homo sapiens	STXBP1;ABAT	2		R-HSA-888589;R-HSA-380901;R-HSA-380869;R-HSA-380905;R-HSA-374922;R-HSA-372529;R-HSA-374899;R-HSA-210426;R-HSA-916855;R-HSA-380574;R-HSA-372505;R-HSA-210430;R-HSA-917744
R-HSA-5619084	ABC transporter disorders	2	99	0.006994	0.172462	0.216514	0.66	1	22	0.00181593	9606	Homo sapiens	PSMB6;PSMB7	2		R-HSA-8866858
R-HSA-4086400	PCP/CE pathway	2	99	0.006994	0.172462	0.216514	0.66	1	24	0.00198102	9606	Homo sapiens	PSMB6;PSMB7	2		R-HSA-4608855
R-HSA-6791226	Major pathway of rRNA processing in the nucleolus and cytosol	3	189	0.0133522	0.172529	0.216514	0.66	2	7	0.000578	9606	Homo sapiens	RPS25;RPL36A	2		R-HSA-6791223;R-HSA-6791218
R-HSA-264642	Acetylcholine Neurotransmitter Release Cycle	1	26	0.00183681	0.178579	0.216514	0.66	2	6	0.000495	9606	Homo sapiens	STXBP1	1		R-HSA-372529;R-HSA-372505
R-HSA-9034015	Signaling by NTRK3 (TRKC)	1	26	0.00183681	0.178579	0.216514	0.66	3	19	0.0015683	9606	Homo sapiens	NELFB	1		R-HSA-9603554;R-HSA-9603598;R-HSA-9603548
R-HSA-422085	Synthesis, secretion, and deacylation of Ghrelin	1	26	0.00183681	0.178579	0.216514	0.66	1	8	0.00066	9606	Homo sapiens	SPCS2	1		R-HSA-422051
R-HSA-389357	CD28 dependent PI3K/Akt signaling	1	26	0.00183681	0.178579	0.216514	0.66	1	9	0.000743	9606	Homo sapiens	MTOR	1		R-HSA-198640
R-HSA-1839117	Signaling by cytosolic FGFR1 fusion mutants	1	26	0.00183681	0.178579	0.216514	0.66	1	14	0.00115559	9606	Homo sapiens	STAT1	1		R-HSA-1888198
R-HSA-167242	Abortive elongation of HIV-1 transcript in the absence of Tat	1	27	0.00190745	0.184776	0.216514	0.66	2	2	0.000165	9606	Homo sapiens	NELFB	1		R-HSA-167147;R-HSA-167087
R-HSA-166208	mTORC1-mediated signalling	1	27	0.00190745	0.184776	0.216514	0.66	2	7	0.000578	9606	Homo sapiens	MTOR	1		R-HSA-165718;R-HSA-165692
R-HSA-5652084	Fructose metabolism	1	27	0.00190745	0.184776	0.216514	0.66	1	7	0.000578	9606	Homo sapiens	ALDOB	1		R-HSA-70342
R-HSA-5668541	TNFR2 non-canonical NF-kB pathway	2	104	0.00734723	0.185954	0.216514	0.66	3	43	0.00354932	9606	Homo sapiens	PSMB6;PSMB7	2		R-HSA-5607731;R-HSA-5668481;R-HSA-5668520
R-HSA-212676	Dopamine Neurotransmitter Release Cycle	1	28	0.0019781	0.190927	0.216514	0.66	2	5	0.000413	9606	Homo sapiens	STXBP1	1		R-HSA-380869;R-HSA-380574
R-HSA-8939236	RUNX1 regulates transcription of genes involved in differentiation of HSCs	2	106	0.00748852	0.191394	0.216514	0.66	1	15	0.00123814	9606	Homo sapiens	PSMB6;PSMB7	2		R-HSA-8957265
R-HSA-933542	TRAF6 mediated NF-kB activation	1	29	0.00204875	0.197032	0.216514	0.66	2	4	0.00033	9606	Homo sapiens	DDX58	1		R-HSA-933530;R-HSA-933528
R-HSA-5621575	CD209 (DC-SIGN) signaling	1	29	0.00204875	0.197032	0.216514	0.66	4	11	0.000908	9606	Homo sapiens	CD209	1		R-HSA-5621573;R-HSA-5621606;R-HSA-5621571;R-HSA-5621615
R-HSA-164952	The role of Nef in HIV-1 replication and disease pathogenesis	1	29	0.00204875	0.197032	0.216514	0.66	4	20	0.00165085	9606	Homo sapiens	B2M	1		R-HSA-182243;R-HSA-182279;R-HSA-182263;R-HSA-182286
R-HSA-8854691	Interleukin-20 family signaling	1	29	0.00204875	0.197032	0.216514	0.66	11	56	0.00462237	9606	Homo sapiens	STAT1	1		R-HSA-8987097;R-HSA-8986985;R-HSA-8987033;R-HSA-8987080;R-HSA-8987007;R-HSA-8987150;R-HSA-8987230;R-HSA-8987266;R-HSA-8987218;R-HSA-8987255;R-HSA-8987270
R-HSA-982772	Growth hormone receptor signaling	1	29	0.00204875	0.197032	0.216514	0.66	2	28	0.00231118	9606	Homo sapiens	STAT1	1		R-HSA-1168768;R-HSA-1168767
R-HSA-5621481	C-type lectin receptors (CLRs)	3	202	0.0142706	0.197079	0.216514	0.66	6	68	0.00561288	9606	Homo sapiens	PSMB6;PSMB7;CD209	3		R-HSA-5621573;R-HSA-5621606;R-HSA-5621571;R-HSA-5607731;R-HSA-5607724;R-HSA-5621615
R-HSA-9020702	Interleukin-1 signaling	2	109	0.00770046	0.199593	0.216514	0.66	1	46	0.00379695	9606	Homo sapiens	PSMB6;PSMB7	2		R-HSA-209061
R-HSA-70171	Glycolysis	2	110	0.00777111	0.202335	0.216514	0.66	2	24	0.00198102	9606	Homo sapiens	HK3;ALDOB	2		R-HSA-70420;R-HSA-71496
R-HSA-181430	Norepinephrine Neurotransmitter Release Cycle	1	30	0.00211939	0.203092	0.216514	0.66	2	6	0.000495	9606	Homo sapiens	STXBP1	1		R-HSA-374899;R-HSA-374922
R-HSA-8868773	rRNA processing in the nucleus and cytosol	3	207	0.0146238	0.206743	0.216514	0.66	2	15	0.00123814	9606	Homo sapiens	RPS25;RPL36A	2		R-HSA-6791223;R-HSA-6791218
R-HSA-2453864	Retinoid cycle disease events	1	31	0.00219004	0.209106	0.216514	0.66	2	16	0.00132068	9606	Homo sapiens	RDH11	1		R-HSA-2471670;R-HSA-2466861
R-HSA-2474795	Diseases associated with visual transduction	1	31	0.00219004	0.209106	0.216514	0.66	2	17	0.00140322	9606	Homo sapiens	RDH11	1		R-HSA-2471670;R-HSA-2466861
R-HSA-449147	Signaling by Interleukins	7	641	0.0452844	0.211733	0.216514	0.66	50	492	0.0406108	9606	Homo sapiens	PSMB6;PSMB7;STAT1;ITGB2	4		R-HSA-6788582;R-HSA-8987150;R-HSA-1112727;R-HSA-1112602;R-HSA-8984963;R-HSA-8987266;R-HSA-1112604;R-HSA-8985988;R-HSA-8984964;R-HSA-8987270;R-HSA-9006873;R-HSA-8987033;R-HSA-8983835;R-HSA-1112587;R-HSA-6788346;R-HSA-9006870;R-HSA-8950441;R-HSA-8985900;R-HSA-8983983;R-HSA-209061;R-HSA-8983841;R-HSA-8983845;R-HSA-8983996;R-HSA-6788571;R-HSA-8950453;R-HSA-8985929;R-HSA-8987080;R-HSA-8950733;R-HSA-89…
R-HSA-210500	Glutamate Neurotransmitter Release Cycle	1	32	0.00226069	0.215075	0.216514	0.66	2	8	0.00066	9606	Homo sapiens	STXBP1	1		R-HSA-210426;R-HSA-210430
R-HSA-70635	Urea cycle	1	32	0.00226069	0.215075	0.216514	0.66	1	8	0.00066	9606	Homo sapiens	ASS1	1		R-HSA-70577
R-HSA-5674400	Constitutive Signaling by AKT1 E17K in Cancer	1	32	0.00226069	0.215075	0.216514	0.66	1	18	0.00148576	9606	Homo sapiens	MTOR	1		R-HSA-2243938
R-HSA-69275	G2/M Transition	3	212	0.014977	0.216514	0.216514	0.66	4	78	0.0064383	9606	Homo sapiens	PSMB6;PSMB7;TUBG2	3		R-HSA-8854071;R-HSA-8852354;R-HSA-8854044;R-HSA-380283
R-HSA-198933	Immunoregulatory interactions between a Lymphoid and a non-Lymphoid cell	4	316	0.0223243	0.217461	0.217461	0.66	14	43	0.00354932	9606	Homo sapiens	LOC100513601;ITGB2;ITGAL;B2M	4		R-HSA-199043;R-HSA-199587;R-HSA-199169;R-HSA-199558;R-HSA-198955;R-HSA-199050;R-HSA-199566;R-HSA-198958;R-HSA-8850326;R-HSA-8850356;R-HSA-199062;R-HSA-199579;R-HSA-199576;R-HSA-199583
R-HSA-453274	Mitotic G2-G2/M phases	3	214	0.0151183	0.220451	0.220451	0.66	4	80	0.00660338	9606	Homo sapiens	PSMB6;PSMB7;TUBG2	3		R-HSA-8854071;R-HSA-8852354;R-HSA-8854044;R-HSA-380283
R-HSA-5607764	CLEC7A (Dectin-1) signaling	2	120	0.00847757	0.229969	0.229969	0.64	2	45	0.0037144	9606	Homo sapiens	PSMB6;PSMB7	2		R-HSA-5607731;R-HSA-5607724
R-HSA-2424491	DAP12 signaling	1	35	0.00247262	0.232716	0.232716	0.63	10	17	0.00140322	9606	Homo sapiens	B2M	1		R-HSA-2395412;R-HSA-2424484;R-HSA-210289;R-HSA-2424486;R-HSA-2424487;R-HSA-2424480;R-HSA-2396594;R-HSA-2424482;R-HSA-2395439;R-HSA-2395801
R-HSA-5656169	Termination of translesion DNA synthesis	1	35	0.00247262	0.232716	0.232716	0.63	5	9	0.000743	9606	Homo sapiens	ISG15	1		R-HSA-5653766;R-HSA-5653780;R-HSA-5653786;R-HSA-5653754;R-HSA-5653770
R-HSA-380972	Energy dependent regulation of mTOR by LKB1-AMPK	1	36	0.00254327	0.238509	0.238509	0.62	2	7	0.000578	9606	Homo sapiens	MTOR	1		R-HSA-447074;R-HSA-380979
R-HSA-9013508	NOTCH3 Intracellular Domain Regulates Transcription	1	36	0.00254327	0.238509	0.238509	0.62	4	22	0.00181593	9606	Homo sapiens	STAT1	1		R-HSA-9021325;R-HSA-9013567;R-HSA-9014129;R-HSA-9021334
R-HSA-186763	Downstream signal transduction	1	36	0.00254327	0.238509	0.238509	0.62	1	16	0.00132068	9606	Homo sapiens	STAT1	1		R-HSA-380782
R-HSA-2173789	TGF-beta receptor signaling activates SMADs	1	36	0.00254327	0.238509	0.238509	0.62	1	39	0.00321915	9606	Homo sapiens	NEDD8	1		R-HSA-4332236
R-HSA-5610787	Hedgehog 'off' state	2	124	0.00876016	0.2411	0.2411	0.62	4	32	0.00264135	9606	Homo sapiens	PSMB6;PSMB7	2		R-HSA-5610757;R-HSA-5610758;R-HSA-5610754;R-HSA-5610760
R-HSA-382556	ABC-family proteins mediated transport	2	124	0.00876016	0.2411	0.2411	0.62	1	28	0.00231118	9606	Homo sapiens	PSMB6;PSMB7	2		R-HSA-8866553
R-HSA-167158	Formation of the HIV-1 Early Elongation Complex	1	37	0.00261392	0.244258	0.244258	0.61	2	5	0.000413	9606	Homo sapiens	NELFB	1		R-HSA-167478;R-HSA-167085
R-HSA-113418	Formation of the Early Elongation Complex	1	37	0.00261392	0.244258	0.244258	0.61	1	3	0.000248	9606	Homo sapiens	NELFB	1		R-HSA-113402
R-HSA-182971	EGFR downregulation	1	37	0.00261392	0.244258	0.244258	0.61	6	22	0.00181593	9606	Homo sapiens	EPN1	1		R-HSA-8867047;R-HSA-183072;R-HSA-8867044;R-HSA-8867041;R-HSA-182986;R-HSA-182990
R-HSA-167243	Tat-mediated HIV elongation arrest and recovery	1	39	0.00275521	0.255628	0.255628	0.59	3	3	0.000248	9606	Homo sapiens	NELFB	1		R-HSA-167090;R-HSA-167459;R-HSA-167148
R-HSA-167238	Pausing and recovery of Tat-mediated HIV elongation	1	39	0.00275521	0.255628	0.255628	0.59	2	2	0.000165	9606	Homo sapiens	NELFB	1		R-HSA-167076;R-HSA-167150
R-HSA-5365859	RA biosynthesis pathway	1	39	0.00275521	0.255628	0.255628	0.59	2	11	0.000908	9606	Homo sapiens	RDH11	1		R-HSA-5362721;R-HSA-5419165
R-HSA-389356	CD28 co-stimulation	1	39	0.00275521	0.255628	0.255628	0.59	1	19	0.0015683	9606	Homo sapiens	MTOR	1		R-HSA-198640
R-HSA-167287	HIV elongation arrest and recovery	1	40	0.00282586	0.261249	0.261249	0.58	3	3	0.000248	9606	Homo sapiens	NELFB	1		R-HSA-167284;R-HSA-167288;R-HSA-167481
R-HSA-167290	Pausing and recovery of HIV elongation	1	40	0.00282586	0.261249	0.261249	0.58	2	2	0.000165	9606	Homo sapiens	NELFB	1		R-HSA-167282;R-HSA-167292
R-HSA-5696394	DNA Damage Recognition in GG-NER	1	40	0.00282586	0.261249	0.261249	0.58	1	5	0.000413	9606	Homo sapiens	GPS1	1		R-HSA-5691006
R-HSA-69239	Synthesis of DNA	2	132	0.00932533	0.263429	0.263429	0.58	2	26	0.0021461	9606	Homo sapiens	PSMB6;PSMB7	2		R-HSA-68948;R-HSA-69016
R-HSA-202430	Translocation of ZAP-70 to Immunological synapse	1	42	0.00296715	0.272366	0.272366	0.56	4	4	0.00033	9606	Homo sapiens	SLA-DQA1	1		R-HSA-8855381;R-HSA-202168;R-HSA-202344;R-HSA-202174
R-HSA-933541	TRAF6 mediated IRF7 activation	1	43	0.0030378	0.277862	0.277862	0.56	5	11	0.000908	9606	Homo sapiens	DDX58	1		R-HSA-918230;R-HSA-933527;R-HSA-933525;R-HSA-933538;R-HSA-933537
R-HSA-381771	Synthesis, secretion, and inactivation of Glucagon-like Peptide-1 (GLP-1)	1	43	0.0030378	0.277862	0.277862	0.56	1	7	0.000578	9606	Homo sapiens	SPCS2	1		R-HSA-400459
R-HSA-5689896	Ovarian tumor domain proteases	1	43	0.0030378	0.277862	0.277862	0.56	1	14	0.00115559	9606	Homo sapiens	DDX58	1		R-HSA-936381
R-HSA-6804757	Regulation of TP53 Degradation	1	43	0.0030378	0.277862	0.277862	0.56	1	30	0.00247627	9606	Homo sapiens	MTOR	1		R-HSA-6795290
R-HSA-422475	Axon guidance	6	583	0.0411869	0.279113	0.279113	0.55	5	297	0.0245151	9606	Homo sapiens	PSMB6;ENAH;PSMB7;RPS25;RPL36A	5		R-HSA-428534;R-HSA-9014652;R-HSA-9011313;R-HSA-376140;R-HSA-9014610
R-HSA-72312	rRNA processing	3	245	0.0173084	0.282982	0.282982	0.55	2	21	0.00173339	9606	Homo sapiens	RPS25;RPL36A	2		R-HSA-6791223;R-HSA-6791218
R-HSA-5218920	VEGFR2 mediated vascular permeability	1	44	0.00310844	0.283317	0.283317	0.55	1	15	0.00123814	9606	Homo sapiens	MTOR	1		R-HSA-198640
R-HSA-69306	DNA Replication	2	141	0.00996114	0.288565	0.288565	0.54	3	47	0.00387949	9606	Homo sapiens	PSMB6;PSMB7	2		R-HSA-68948;R-HSA-68825;R-HSA-69016
R-HSA-202427	Phosphorylation of CD3 and TCR zeta chains	1	45	0.00317909	0.288731	0.288731	0.54	5	7	0.000578	9606	Homo sapiens	SLA-DQA1	1		R-HSA-202291;R-HSA-202214;R-HSA-202165;R-HSA-202233;R-HSA-8852200
R-HSA-389948	PD-1 signaling	1	45	0.00317909	0.288731	0.288731	0.54	1	4	0.00033	9606	Homo sapiens	SLA-DQA1	1		R-HSA-389758
R-HSA-168276	NS1 Mediated Effects on Host Pathways	1	46	0.00324974	0.294104	0.294104	0.53	1	6	0.000495	9606	Homo sapiens	ISG15	1		R-HSA-1176059
R-HSA-6806003	Regulation of TP53 Expression and Degradation	1	46	0.00324974	0.294104	0.294104	0.53	1	35	0.00288898	9606	Homo sapiens	MTOR	1		R-HSA-6795290
R-HSA-168249	Innate Immune System	12	1324	0.0935359	0.2984	0.2984	0.53	65	685	0.0565415	9606	Homo sapiens	PSMB6;ZBP1;PSMB7;HK3;CD209;DDX58;DHX58;ITGB2;ISG15;ITGAL;OLFM4;B2M	12		R-HSA-2424484;R-HSA-936462;R-HSA-2424486;R-HSA-1810457;R-HSA-2424487;R-HSA-2424480;R-HSA-210309;R-HSA-2424482;R-HSA-2395439;R-HSA-5621573;R-HSA-6799350;R-HSA-933532;R-HSA-933530;R-HSA-936475;R-HSA-2396594;R-HSA-5621571;R-HSA-933528;R-HSA-933526;R-HSA-933527;R-HSA-933525;R-HSA-933523;R-HSA-933538;R-HSA-1606324;R-HSA-933539;R-HSA-933537;R-HSA-1606327;R-HSA-2395412;R-HSA-990526;R-HSA-5621606;R-HSA-9…
R-HSA-400508	Incretin synthesis, secretion, and inactivation	1	47	0.00332038	0.299438	0.299438	0.52	2	14	0.00115559	9606	Homo sapiens	SPCS2	1		R-HSA-400496;R-HSA-400459
R-HSA-451927	Interleukin-2 family signaling	1	47	0.00332038	0.299438	0.299438	0.52	8	58	0.00478745	9606	Homo sapiens	STAT1	1		R-HSA-8985929;R-HSA-9006873;R-HSA-8985981;R-HSA-8985900;R-HSA-8985966;R-HSA-8985988;R-HSA-8985943;R-HSA-9006870
R-HSA-110313	Translesion synthesis by Y family DNA polymerases bypasses lesions on DNA template	1	48	0.00339103	0.304731	0.304731	0.52	5	28	0.00231118	9606	Homo sapiens	ISG15	1		R-HSA-5653766;R-HSA-5653780;R-HSA-5653786;R-HSA-5653754;R-HSA-5653770
R-HSA-1839124	FGFR1 mutant receptor activation	1	48	0.00339103	0.304731	0.304731	0.52	1	25	0.00206356	9606	Homo sapiens	STAT1	1		R-HSA-1888198
R-HSA-8856688	Golgi-to-ER retrograde transport	2	148	0.0104557	0.308058	0.308058	0.51	5	18	0.00148576	9606	Homo sapiens	KIF11;RAB3GAP1	2		R-HSA-6811426;R-HSA-6811423;R-HSA-8850041;R-HSA-8849353;R-HSA-8850040
R-HSA-167200	Formation of HIV-1 elongation complex containing HIV-1 Tat	1	49	0.00346167	0.309985	0.309985	0.51	4	5	0.000413	9606	Homo sapiens	NELFB	1		R-HSA-170706;R-HSA-170704;R-HSA-167191;R-HSA-167196
R-HSA-165159	mTOR signalling	1	49	0.00346167	0.309985	0.309985	0.51	10	28	0.00231118	9606	Homo sapiens	MTOR	1		R-HSA-165680;R-HSA-165718;R-HSA-447074;R-HSA-5653968;R-HSA-380979;R-HSA-377186;R-HSA-5672828;R-HSA-5672843;R-HSA-165692;R-HSA-5672824
R-HSA-5663202	Diseases of signal transduction	5	489	0.0345461	0.311031	0.311031	0.51	5	289	0.0238547	9606	Homo sapiens	PSMB6;PSMB7;STAT1;RDH11;MTOR	5		R-HSA-2243938;R-HSA-5387392;R-HSA-2471670;R-HSA-2466861;R-HSA-1888198
R-HSA-69206	G1/S Transition	2	150	0.010597	0.313611	0.313611	0.5	1	61	0.00503508	9606	Homo sapiens	PSMB6;PSMB7	2		R-HSA-187574
R-HSA-167152	Formation of HIV elongation complex in the absence of HIV Tat	1	50	0.00353232	0.315199	0.315199	0.5	2	2	0.000165	9606	Homo sapiens	NELFB	1		R-HSA-167077;R-HSA-167084
R-HSA-168253	Host Interactions with Influenza Factors	1	50	0.00353232	0.315199	0.315199	0.5	1	8	0.00066	9606	Homo sapiens	ISG15	1		R-HSA-1176059
R-HSA-379716	Cytosolic tRNA aminoacylation	1	50	0.00353232	0.315199	0.315199	0.5	1	21	0.00173339	9606	Homo sapiens	WARS	1		R-HSA-379977
R-HSA-69481	G2/M Checkpoints	2	154	0.0108795	0.324689	0.324689	0.49	1	24	0.00198102	9606	Homo sapiens	PSMB6;PSMB7	2		R-HSA-8852354
R-HSA-167246	Tat-mediated elongation of the HIV-1 transcript	1	52	0.00367361	0.325511	0.325511	0.49	7	8	0.00066	9606	Homo sapiens	NELFB	1		R-HSA-170706;R-HSA-170704;R-HSA-167191;R-HSA-167192;R-HSA-167196;R-HSA-167197;R-HSA-167181
R-HSA-167169	HIV Transcription Elongation	1	52	0.00367361	0.325511	0.325511	0.49	11	15	0.00123814	9606	Homo sapiens	NELFB	1		R-HSA-170706;R-HSA-170704;R-HSA-167478;R-HSA-167191;R-HSA-167147;R-HSA-167192;R-HSA-167087;R-HSA-167196;R-HSA-167197;R-HSA-167181;R-HSA-167085
R-HSA-2172127	DAP12 interactions	1	52	0.00367361	0.325511	0.325511	0.49	14	33	0.0027239	9606	Homo sapiens	B2M	1		R-HSA-2424484;R-HSA-2424486;R-HSA-2424487;R-HSA-2424480;R-HSA-210309;R-HSA-2424482;R-HSA-2395439;R-HSA-2395412;R-HSA-210289;R-HSA-2272753;R-HSA-2396594;R-HSA-2272795;R-HSA-2395801;R-HSA-2172126
R-HSA-156581	Methylation	1	52	0.00367361	0.325511	0.325511	0.49	1	13	0.00107305	9606	Homo sapiens	MAT2B	1		R-HSA-5603114
R-HSA-6781823	Formation of TC-NER Pre-Incision Complex	1	56	0.0039562	0.345676	0.345676	0.46	1	7	0.000578	9606	Homo sapiens	GPS1	1		R-HSA-6781833
R-HSA-446652	Interleukin-1 family signaling	2	163	0.0115154	0.349439	0.349439	0.46	1	79	0.00652084	9606	Homo sapiens	PSMB6;PSMB7	2		R-HSA-209061
R-HSA-5655302	Signaling by FGFR1 in disease	1	57	0.00402685	0.350623	0.350623	0.46	1	35	0.00288898	9606	Homo sapiens	STAT1	1		R-HSA-1888198
R-HSA-3858494	Beta-catenin independent WNT signaling	2	165	0.0116567	0.354901	0.354901	0.45	1	51	0.00420966	9606	Homo sapiens	PSMB6;PSMB7	2		R-HSA-4608855
R-HSA-73893	DNA Damage Bypass	1	58	0.00409749	0.355533	0.355533	0.45	5	34	0.00280644	9606	Homo sapiens	ISG15	1		R-HSA-5653766;R-HSA-5653780;R-HSA-5653786;R-HSA-5653754;R-HSA-5653770
R-HSA-2162123	Synthesis of Prostaglandins (PG) and Thromboxanes (TX)	1	58	0.00409749	0.355533	0.355533	0.45	1	32	0.00264135	9606	Homo sapiens	PTGR2	1		R-HSA-2161692
R-HSA-9006934	Signaling by Receptor Tyrosine Kinases	5	521	0.0368068	0.358865	0.358865	0.45	15	633	0.0522493	9606	Homo sapiens	STAT1;NELFB;MTOR;EPN1	4		R-HSA-8867047;R-HSA-183072;R-HSA-8867044;R-HSA-1433456;R-HSA-8867041;R-HSA-182986;R-HSA-1470012;R-HSA-380782;R-HSA-1470010;R-HSA-182990;R-HSA-9603548;R-HSA-1470009;R-HSA-9603554;R-HSA-198640;R-HSA-9603598
R-HSA-177929	Signaling by EGFR	1	59	0.00416814	0.360407	0.360407	0.44	6	48	0.00396203	9606	Homo sapiens	EPN1	1		R-HSA-8867047;R-HSA-183072;R-HSA-8867044;R-HSA-8867041;R-HSA-182986;R-HSA-182990
R-HSA-3371571	HSF1-dependent transactivation	1	59	0.00416814	0.360407	0.360407	0.44	1	8	0.00066	9606	Homo sapiens	MTOR	1		R-HSA-5082405
R-HSA-5358351	Signaling by Hedgehog	2	168	0.0118686	0.363064	0.363064	0.44	7	82	0.00676847	9606	Homo sapiens	PSMB6;PSMB7	2		R-HSA-5610757;R-HSA-5362448;R-HSA-5610758;R-HSA-5610754;R-HSA-5635868;R-HSA-5635854;R-HSA-5610760
R-HSA-2187338	Visual phototransduction	2	168	0.0118686	0.363064	0.363064	0.44	3	90	0.00742881	9606	Homo sapiens	RDH11	1		R-HSA-975629;R-HSA-2464822;R-HSA-74872
R-HSA-6794361	Neurexins and neuroligins	1	60	0.00423879	0.365244	0.365244	0.44	1	19	0.0015683	9606	Homo sapiens	STXBP1	1		R-HSA-6794353
R-HSA-9609507	Protein localization	2	170	0.0120099	0.368485	0.368485	0.43	2	53	0.00437474	9606	Homo sapiens	PMPCB;PMPCA	2		R-HSA-1299478;R-HSA-1299476
R-HSA-453279	Mitotic G1-G1/S phases	2	173	0.0122218	0.376583	0.376583	0.42	1	98	0.00808915	9606	Homo sapiens	PSMB6;PSMB7	2		R-HSA-187574
R-HSA-8953854	Metabolism of RNA	7	782	0.0552455	0.378994	0.378994	0.42	14	187	0.0154354	9606	Homo sapiens	PSMB6;ZBP1;PSMB7;RPS25;RPL36A;GEMIN5	6		R-HSA-927789;R-HSA-450466;R-HSA-191786;R-HSA-191784;R-HSA-927813;R-HSA-191790;R-HSA-428296;R-HSA-6791223;R-HSA-191763;R-HSA-927836;R-HSA-191830;R-HSA-6791218;R-HSA-927832;R-HSA-927889
R-HSA-112382	Formation of RNA Pol II elongation complex	1	63	0.00445072	0.379538	0.379538	0.42	2	2	0.000165	9606	Homo sapiens	NELFB	1		R-HSA-112379;R-HSA-112381
R-HSA-6811436	COPI-independent Golgi-to-ER retrograde traffic	1	63	0.00445072	0.379538	0.379538	0.42	3	7	0.000578	9606	Homo sapiens	RAB3GAP1	1		R-HSA-8850041;R-HSA-8849353;R-HSA-8850040
R-HSA-9012852	Signaling by NOTCH3	1	63	0.00445072	0.379538	0.379538	0.42	4	37	0.00305406	9606	Homo sapiens	STAT1	1		R-HSA-9021325;R-HSA-9013567;R-HSA-9014129;R-HSA-9021334
R-HSA-2871837	FCERI mediated NF-kB activation	2	175	0.0123631	0.381958	0.381958	0.42	1	19	0.0015683	9606	Homo sapiens	PSMB6;PSMB7	2		R-HSA-5607724
R-HSA-71291	Metabolism of amino acids and derivatives	6	660	0.0466266	0.382038	0.382038	0.42	4	283	0.0233595	9606	Homo sapiens	PSMB6;PSMB7;RPS25;RPL36A;ASS1	5		R-HSA-70577;R-HSA-353125;R-HSA-2408529;R-HSA-5333615
R-HSA-199991	Membrane Trafficking	6	665	0.0469799	0.388831	0.388831	0.41	30	218	0.0179942	9606	Homo sapiens	TBC1D1;GPS1;NEDD8;KIF11;RAB3GAP1;EPN1	6		R-HSA-1445143;R-HSA-8868230;R-HSA-6811426;R-HSA-8868236;R-HSA-8849353;R-HSA-8871194;R-HSA-8871193;R-HSA-8868071;R-HSA-8866279;R-HSA-8866275;R-HSA-8863727;R-HSA-8877998;R-HSA-8867756;R-HSA-8863723;R-HSA-8868651;R-HSA-8866283;R-HSA-8867754;R-HSA-8863721;R-HSA-8868072;R-HSA-8868648;R-HSA-8868661;R-HSA-8868660;R-HSA-8868659;R-HSA-8868658;R-HSA-1454689;R-HSA-6811423;R-HSA-8869438;R-HSA-1454699;R-HSA-8…
R-HSA-1483191	Synthesis of PC	1	65	0.00459202	0.388889	0.388889	0.41	3	18	0.00148576	9606	Homo sapiens	STARD10	1		R-HSA-8873923;R-HSA-8873834;R-HSA-8873929
R-HSA-69242	S Phase	2	179	0.0126457	0.392651	0.392651	0.41	4	54	0.00445728	9606	Homo sapiens	PSMB6;PSMB7	2		R-HSA-75825;R-HSA-187574;R-HSA-68948;R-HSA-69016
R-HSA-191859	snRNP Assembly	1	66	0.00466266	0.393513	0.393513	0.41	5	6	0.000495	9606	Homo sapiens	GEMIN5	1		R-HSA-191763;R-HSA-191830;R-HSA-191786;R-HSA-191784;R-HSA-191790
R-HSA-194441	Metabolism of non-coding RNA	1	66	0.00466266	0.393513	0.393513	0.41	5	6	0.000495	9606	Homo sapiens	GEMIN5	1		R-HSA-191763;R-HSA-191830;R-HSA-191786;R-HSA-191784;R-HSA-191790
R-HSA-75955	RNA Polymerase II Transcription Elongation	1	66	0.00466266	0.393513	0.393513	0.41	6	8	0.00066	9606	Homo sapiens	NELFB	1		R-HSA-112385;R-HSA-113412;R-HSA-112379;R-HSA-113402;R-HSA-112381;R-HSA-112396
R-HSA-983189	Kinesins	1	68	0.00480396	0.402656	0.402656	0.4	3	14	0.00115559	9606	Homo sapiens	KIF11	1		R-HSA-984606;R-HSA-983259;R-HSA-983266
R-HSA-379724	tRNA Aminoacylation	1	68	0.00480396	0.402656	0.402656	0.4	1	42	0.00346678	9606	Homo sapiens	WARS	1		R-HSA-379977
R-HSA-186797	Signaling by PDGF	1	69	0.0048746	0.407176	0.407176	0.39	1	28	0.00231118	9606	Homo sapiens	STAT1	1		R-HSA-380782
R-HSA-8943724	Regulation of PTEN gene transcription	1	70	0.00494525	0.411662	0.411662	0.39	2	15	0.00123814	9606	Homo sapiens	MTOR	1		R-HSA-8944457;R-HSA-8944454
R-HSA-109581	Apoptosis	2	187	0.0132109	0.413786	0.413786	0.38	1	139	0.0114734	9606	Homo sapiens	PSMB6;PSMB7	2		R-HSA-211715
R-HSA-5362517	Signaling by Retinoic Acid	1	72	0.00508654	0.420534	0.420534	0.38	2	21	0.00173339	9606	Homo sapiens	RDH11	1		R-HSA-5362721;R-HSA-5419165
R-HSA-983705	Signaling by the B Cell Receptor (BCR)	2	190	0.0134228	0.421619	0.421619	0.38	1	43	0.00354932	9606	Homo sapiens	PSMB6;PSMB7	2		R-HSA-1168640
R-HSA-1257604	PIP3 activates AKT signaling	3	316	0.0223243	0.42848	0.42848	0.37	4	86	0.00709864	9606	Homo sapiens	PSMB6;PSMB7;MTOR	3		R-HSA-8944457;R-HSA-198640;R-HSA-8850992;R-HSA-8944454
R-HSA-2467813	Separation of Sister Chromatids	2	194	0.0137054	0.431981	0.431981	0.36	1	8	0.00066	9606	Homo sapiens	PSMB6;PSMB7	2		R-HSA-174202
R-HSA-5357801	Programmed Cell Death	2	195	0.0137761	0.434557	0.434557	0.36	1	152	0.0125464	9606	Homo sapiens	PSMB6;PSMB7	2		R-HSA-211715
R-HSA-1834949	Cytosolic sensors of pathogen-associated DNA	1	77	0.00543977	0.442139	0.442139	0.35	8	48	0.00396203	9606	Homo sapiens	ZBP1	1		R-HSA-1606345;R-HSA-1810457;R-HSA-8948703;R-HSA-1591234;R-HSA-3249386;R-HSA-168910;R-HSA-1606324;R-HSA-1606327
R-HSA-1445148	Translocation of SLC2A4 (GLUT4) to the plasma membrane	1	79	0.00558107	0.450555	0.450555	0.35	3	15	0.00123814	9606	Homo sapiens	TBC1D1	1		R-HSA-1445143;R-HSA-1454689;R-HSA-1454699
R-HSA-975634	Retinoid metabolism and transport	1	79	0.00558107	0.450555	0.450555	0.35	1	28	0.00231118	9606	Homo sapiens	RDH11	1		R-HSA-975629
R-HSA-1660661	Sphingolipid de novo biosynthesis	1	79	0.00558107	0.450555	0.450555	0.35	1	30	0.00247627	9606	Homo sapiens	PRKD2	1		R-HSA-429698
R-HSA-167172	Transcription of the HIV genome	1	81	0.00572236	0.458846	0.458846	0.34	23	47	0.00387949	9606	Homo sapiens	NELFB	1		R-HSA-167459;R-HSA-167076;R-HSA-167077;R-HSA-167147;R-HSA-167150;R-HSA-167087;R-HSA-167148;R-HSA-167084;R-HSA-167181;R-HSA-167085;R-HSA-170706;R-HSA-167090;R-HSA-167282;R-HSA-170704;R-HSA-167478;R-HSA-167191;R-HSA-167284;R-HSA-167192;R-HSA-167288;R-HSA-167481;R-HSA-167196;R-HSA-167292;R-HSA-167197
R-HSA-380270	Recruitment of mitotic centrosome proteins and complexes	1	81	0.00572236	0.458846	0.458846	0.34	1	3	0.000248	9606	Homo sapiens	TUBG2	1		R-HSA-380283
R-HSA-499943	Interconversion of nucleotide di- and triphosphates	1	81	0.00572236	0.458846	0.458846	0.34	3	33	0.0027239	9606	Homo sapiens	GLRX	1		R-HSA-8866405;R-HSA-111746;R-HSA-111742
R-HSA-5663084	Diseases of carbohydrate metabolism	1	81	0.00572236	0.458846	0.458846	0.34	1	44	0.00363186	9606	Homo sapiens	ALDOB	1		R-HSA-5656438
R-HSA-5683057	MAPK family signaling cascades	3	332	0.0234546	0.460205	0.460205	0.34	4	86	0.00709864	9606	Homo sapiens	PSMB6;ZBP1;PSMB7	3		R-HSA-5687079;R-HSA-5687105;R-HSA-5658430;R-HSA-5687112
R-HSA-380287	Centrosome maturation	1	83	0.00586365	0.467013	0.467013	0.33	1	6	0.000495	9606	Homo sapiens	TUBG2	1		R-HSA-380283
R-HSA-917937	Iron uptake and transport	1	83	0.00586365	0.467013	0.467013	0.33	2	34	0.00280644	9606	Homo sapiens	NEDD8	1		R-HSA-5691108;R-HSA-5691176
R-HSA-68882	Mitotic Anaphase	2	208	0.0146945	0.467459	0.467459	0.33	1	11	0.000908	9606	Homo sapiens	PSMB6;PSMB7	2		R-HSA-174202
R-HSA-2555396	Mitotic Metaphase and Anaphase	2	211	0.0149064	0.474893	0.474893	0.32	1	12	0.000991	9606	Homo sapiens	PSMB6;PSMB7	2		R-HSA-174202
R-HSA-6781827	Transcription-Coupled Nucleotide Excision Repair (TC-NER)	1	85	0.00600495	0.475057	0.475057	0.32	1	16	0.00132068	9606	Homo sapiens	GPS1	1		R-HSA-6781833
R-HSA-170834	Signaling by TGF-beta Receptor Complex	1	85	0.00600495	0.475057	0.475057	0.32	1	82	0.00676847	9606	Homo sapiens	NEDD8	1		R-HSA-4332236
R-HSA-674695	RNA Polymerase II Pre-transcription Events	1	88	0.00621688	0.486899	0.486899	0.31	8	17	0.00140322	9606	Homo sapiens	NELFB	1		R-HSA-113409;R-HSA-113411;R-HSA-113429;R-HSA-112437;R-HSA-113413;R-HSA-113414;R-HSA-112392;R-HSA-112395
R-HSA-977225	Amyloid fiber formation	1	88	0.00621688	0.486899	0.486899	0.31	2	33	0.0027239	9606	Homo sapiens	B2M	1		R-HSA-976734;R-HSA-977136
R-HSA-201681	TCF dependent signaling in response to WNT	2	216	0.0152596	0.487145	0.487145	0.31	4	71	0.0058605	9606	Homo sapiens	PSMB6;PSMB7	2		R-HSA-1504193;R-HSA-4641260;R-HSA-3640874;R-HSA-4641256
R-HSA-6796648	TP53 Regulates Transcription of DNA Repair Genes	1	89	0.00628753	0.490787	0.490787	0.31	3	17	0.00140322	9606	Homo sapiens	NELFB	1		R-HSA-6797606;R-HSA-6797616;R-HSA-6797712
R-HSA-6811442	Intra-Golgi and retrograde Golgi-to-ER traffic	2	218	0.0154009	0.491996	0.491996	0.31	5	48	0.00396203	9606	Homo sapiens	KIF11;RAB3GAP1	2		R-HSA-6811426;R-HSA-6811423;R-HSA-8850041;R-HSA-8849353;R-HSA-8850040
R-HSA-5696399	Global Genome Nucleotide Excision Repair (GG-NER)	1	92	0.00649947	0.502278	0.502278	0.3	1	20	0.00165085	9606	Homo sapiens	GPS1	1		R-HSA-5691006
R-HSA-6794362	Protein-protein interactions at synapses	1	93	0.00657012	0.506051	0.506051	0.3	1	33	0.0027239	9606	Homo sapiens	STXBP1	1		R-HSA-6794353
R-HSA-1226099	Signaling by FGFR in disease	1	93	0.00657012	0.506051	0.506051	0.3	1	106	0.00874948	9606	Homo sapiens	STAT1	1		R-HSA-1888198
R-HSA-8876198	RAB GEFs exchange GTP for GDP on RABs	1	94	0.00664076	0.509795	0.509795	0.29	1	21	0.00173339	9606	Homo sapiens	RAB3GAP1	1		R-HSA-8877998
R-HSA-6806667	Metabolism of fat-soluble vitamins	1	94	0.00664076	0.509795	0.509795	0.29	1	34	0.00280644	9606	Homo sapiens	RDH11	1		R-HSA-975629
R-HSA-1643685	Disease	12	1551	0.109573	0.511451	0.511451	0.29	39	957	0.078993	9606	Homo sapiens	PSMB6;PSMB7;RPS25;STAT1;RDH11;RPL36A;ISG15;NELFB;ALDOB;B2M;MTOR	11		R-HSA-2243938;R-HSA-192704;R-HSA-182279;R-HSA-2466861;R-HSA-192841;R-HSA-182286;R-HSA-167181;R-HSA-170706;R-HSA-5387392;R-HSA-170704;R-HSA-2471670;R-HSA-167191;R-HSA-1888198;R-HSA-167192;R-HSA-167196;R-HSA-180573;R-HSA-167197;R-HSA-5656438;R-HSA-182243;R-HSA-167459;R-HSA-167076;R-HSA-167077;R-HSA-167147;R-HSA-1176059;R-HSA-167150;R-HSA-8866858;R-HSA-167087;R-HSA-167148;R-HSA-167084;R-HSA-167085;R…
R-HSA-447115	Interleukin-12 family signaling	1	96	0.00678206	0.5172	0.5172	0.29	17	114	0.00940982	9606	Homo sapiens	STAT1	1		R-HSA-8950441;R-HSA-8950733;R-HSA-8983983;R-HSA-8984014;R-HSA-8983841;R-HSA-8984963;R-HSA-8983845;R-HSA-8984964;R-HSA-8983835;R-HSA-8950522;R-HSA-8983996;R-HSA-8950782;R-HSA-8984021;R-HSA-8950485;R-HSA-8950453;R-HSA-8950518;R-HSA-8984023
R-HSA-9006925	Intracellular signaling by second messengers	3	362	0.025574	0.517569	0.517569	0.29	4	113	0.00932728	9606	Homo sapiens	PSMB6;PSMB7;MTOR	3		R-HSA-8944457;R-HSA-198640;R-HSA-8850992;R-HSA-8944454
R-HSA-380320	Recruitment of NuMA to mitotic centrosomes	1	97	0.0068527	0.52086	0.52086	0.28	2	2	0.000165	9606	Homo sapiens	TUBG2	1		R-HSA-380316;R-HSA-380508
R-HSA-1483206	Glycerophospholipid biosynthesis	2	232	0.01639	0.525145	0.525145	0.28	4	133	0.0109781	9606	Homo sapiens	STARD10;CDIPT	2		R-HSA-8873923;R-HSA-1482976;R-HSA-8873834;R-HSA-8873929
R-HSA-2454202	Fc epsilon receptor (FCERI) signaling	2	234	0.0165313	0.529762	0.529762	0.28	1	63	0.00520016	9606	Homo sapiens	PSMB6;PSMB7	2		R-HSA-5607724
R-HSA-1632852	Macroautophagy	1	103	0.00727658	0.542254	0.542254	0.27	5	54	0.00445728	9606	Homo sapiens	MTOR	1		R-HSA-5672017;R-HSA-5672817;R-HSA-5675790;R-HSA-5672010;R-HSA-5673768
R-HSA-422356	Regulation of insulin secretion	1	106	0.00748852	0.552593	0.552593	0.26	1	34	0.00280644	9606	Homo sapiens	STXBP1	1		R-HSA-265166
R-HSA-6811434	COPI-dependent Golgi-to-ER retrograde traffic	1	107	0.00755917	0.555988	0.555988	0.25	2	11	0.000908	9606	Homo sapiens	KIF11	1		R-HSA-6811426;R-HSA-6811423
R-HSA-8957275	Post-translational protein phosphorylation	1	109	0.00770046	0.562701	0.562701	0.25	1	1	8.25e-05	9606	Homo sapiens	RCN1	1		R-HSA-8952289
R-HSA-68886	M Phase	3	390	0.0275521	0.568097	0.568097	0.25	3	66	0.00544779	9606	Homo sapiens	PSMB6;PSMB7;TUBG2	3		R-HSA-174202;R-HSA-380316;R-HSA-380508
R-HSA-192105	Synthesis of bile acids and bile salts	1	111	0.00784175	0.569313	0.569313	0.24	1	83	0.00685101	9606	Homo sapiens	OSBPL9	1		R-HSA-8867667
R-HSA-15869	Metabolism of nucleotides	2	254	0.0179442	0.57426	0.57426	0.24	4	135	0.0111432	9606	Homo sapiens	GLRX;SAMHD1	2		R-HSA-8866405;R-HSA-111746;R-HSA-8866601;R-HSA-111742
R-HSA-397014	Muscle contraction	2	256	0.0180855	0.578541	0.578541	0.24	4	41	0.00338423	9606	Homo sapiens	ACTA2	1		R-HSA-445700;R-HSA-445699;R-HSA-445704;R-HSA-445705
R-HSA-202733	Cell surface interactions at the vascular wall	2	256	0.0180855	0.578541	0.578541	0.24	3	64	0.00528271	9606	Homo sapiens	ITGB2;ITGAL	2		R-HSA-202704;R-HSA-202727;R-HSA-202718
R-HSA-9006936	Signaling by TGF-beta family members	1	114	0.00805369	0.579047	0.579047	0.24	1	107	0.00883203	9606	Homo sapiens	NEDD8	1		R-HSA-4332236
R-HSA-166520	Signaling by NTRKs	1	115	0.00812434	0.582243	0.582243	0.23	3	121	0.00998762	9606	Homo sapiens	NELFB	1		R-HSA-9603554;R-HSA-9603598;R-HSA-9603548
R-HSA-8878171	Transcriptional regulation by RUNX1	2	261	0.0184387	0.589105	0.589105	0.23	1	132	0.0108956	9606	Homo sapiens	PSMB6;PSMB7	2		R-HSA-8957265
R-HSA-5696398	Nucleotide Excision Repair	1	119	0.00840692	0.594787	0.594787	0.23	2	36	0.00297152	9606	Homo sapiens	GPS1	1		R-HSA-5691006;R-HSA-6781833
R-HSA-5653656	Vesicle-mediated transport	6	824	0.0582126	0.596029	0.596029	0.22	30	251	0.0207181	9606	Homo sapiens	TBC1D1;GPS1;NEDD8;KIF11;RAB3GAP1;EPN1	6		R-HSA-1445143;R-HSA-8868230;R-HSA-6811426;R-HSA-8868236;R-HSA-8849353;R-HSA-8871194;R-HSA-8871193;R-HSA-8868071;R-HSA-8866279;R-HSA-8866275;R-HSA-8863727;R-HSA-8877998;R-HSA-8867756;R-HSA-8863723;R-HSA-8868651;R-HSA-8866283;R-HSA-8867754;R-HSA-8863721;R-HSA-8868072;R-HSA-8868648;R-HSA-8868661;R-HSA-8868660;R-HSA-8868659;R-HSA-8868658;R-HSA-1454689;R-HSA-6811423;R-HSA-8869438;R-HSA-1454699;R-HSA-8…
R-HSA-194068	Bile acid and bile salt metabolism	1	121	0.00854822	0.600919	0.600919	0.22	1	94	0.00775898	9606	Homo sapiens	OSBPL9	1		R-HSA-8867667
R-HSA-5628897	TP53 Regulates Metabolic Genes	1	125	0.0088308	0.612908	0.612908	0.21	1	34	0.00280644	9606	Homo sapiens	MTOR	1		R-HSA-380979
R-HSA-4420097	VEGFA-VEGFR2 Pathway	1	125	0.0088308	0.612908	0.612908	0.21	1	77	0.00635576	9606	Homo sapiens	MTOR	1		R-HSA-198640
R-HSA-5673001	RAF/MAP kinase cascade	2	274	0.0193571	0.615659	0.615659	0.21	1	39	0.00321915	9606	Homo sapiens	PSMB6;PSMB7	2		R-HSA-5658430
R-HSA-381426	Regulation of Insulin-like Growth Factor (IGF) transport and uptake by Insulin-like Growth Factor Binding Proteins (IGFBPs)	1	127	0.00897209	0.618768	0.618768	0.21	1	14	0.00115559	9606	Homo sapiens	RCN1	1		R-HSA-8952289
R-HSA-9007101	Rab regulation of trafficking	1	129	0.00911339	0.62454	0.62454	0.2	1	35	0.00288898	9606	Homo sapiens	RAB3GAP1	1		R-HSA-8877998
R-HSA-69620	Cell Cycle Checkpoints	2	279	0.0197104	0.625521	0.625521	0.2	3	56	0.00462237	9606	Homo sapiens	PSMB6;PSMB7	2		R-HSA-69600;R-HSA-8852354;R-HSA-264458
R-HSA-5684996	MAPK1/MAPK3 signaling	2	281	0.0198516	0.629411	0.629411	0.2	1	46	0.00379695	9606	Homo sapiens	PSMB6;PSMB7	2		R-HSA-5658430
R-HSA-5619115	Disorders of transmembrane transporters	2	281	0.0198516	0.629411	0.629411	0.2	1	88	0.00726372	9606	Homo sapiens	PSMB6;PSMB7	2		R-HSA-8866858
R-HSA-2219528	PI3K/AKT Signaling in Cancer	1	134	0.00946662	0.638594	0.638594	0.19	1	21	0.00173339	9606	Homo sapiens	MTOR	1		R-HSA-2243938
R-HSA-194138	Signaling by VEGF	1	134	0.00946662	0.638594	0.638594	0.19	1	83	0.00685101	9606	Homo sapiens	MTOR	1		R-HSA-198640
R-HSA-3371556	Cellular response to heat stress	1	135	0.00953727	0.641342	0.641342	0.19	1	29	0.00239373	9606	Homo sapiens	MTOR	1		R-HSA-5082405
R-HSA-114608	Platelet degranulation	1	137	0.00967856	0.646775	0.646775	0.19	1	11	0.000908	9606	Homo sapiens	PLEK	1		R-HSA-482772
R-HSA-6809371	Formation of the cornified envelope	1	138	0.00974921	0.649461	0.649461	0.19	8	27	0.00222864	9606	Homo sapiens	KRT18	1		R-HSA-6810357;R-HSA-6811539;R-HSA-6814387;R-HSA-8942224;R-HSA-6814734;R-HSA-6814764;R-HSA-6814298;R-HSA-6810937
R-HSA-8956319	Nucleobase catabolism	1	139	0.00981985	0.652127	0.652127	0.19	1	58	0.00478745	9606	Homo sapiens	SAMHD1	1		R-HSA-8866601
R-HSA-76005	Response to elevated platelet cytosolic Ca2+	1	144	0.0101731	0.665157	0.665157	0.18	1	14	0.00115559	9606	Homo sapiens	PLEK	1		R-HSA-482772
R-HSA-163685	Integration of energy metabolism	1	144	0.0101731	0.665157	0.665157	0.18	1	62	0.00511762	9606	Homo sapiens	STXBP1	1		R-HSA-265166
R-HSA-166016	Toll Like Receptor 4 (TLR4) Cascade	1	144	0.0101731	0.665157	0.665157	0.18	1	95	0.00784152	9606	Homo sapiens	ITGB2	1		R-HSA-2559439
R-HSA-2980736	Peptide hormone metabolism	1	147	0.010385	0.672742	0.672742	0.17	3	63	0.00520016	9606	Homo sapiens	SPCS2	1		R-HSA-422051;R-HSA-400496;R-HSA-400459
R-HSA-71387	Metabolism of carbohydrates	3	458	0.0323561	0.676604	0.676604	0.17	5	242	0.0199752	9606	Homo sapiens	HK3;ALDOB;FBP1	3		R-HSA-70420;R-HSA-71495;R-HSA-70342;R-HSA-71496;R-HSA-70479
R-HSA-983168	Antigen processing: Ubiquitination & Proteasome degradation	2	315	0.0222536	0.690847	0.690847	0.16	1	9	0.000743	9606	Homo sapiens	PSMB6;PSMB7	2		R-HSA-983150
R-HSA-428157	Sphingolipid metabolism	1	157	0.0110915	0.696817	0.696817	0.16	1	62	0.00511762	9606	Homo sapiens	PRKD2	1		R-HSA-429698
R-HSA-1483257	Phospholipid metabolism	2	325	0.0229601	0.707264	0.707264	0.15	4	218	0.0179942	9606	Homo sapiens	STARD10;CDIPT	2		R-HSA-8873923;R-HSA-1482976;R-HSA-8873834;R-HSA-8873929
R-HSA-162599	Late Phase of HIV Life Cycle	1	163	0.0115154	0.710411	0.710411	0.15	23	77	0.00635576	9606	Homo sapiens	NELFB	1		R-HSA-167459;R-HSA-167076;R-HSA-167077;R-HSA-167147;R-HSA-167150;R-HSA-167087;R-HSA-167148;R-HSA-167084;R-HSA-167181;R-HSA-167085;R-HSA-170706;R-HSA-167090;R-HSA-167282;R-HSA-170704;R-HSA-167478;R-HSA-167191;R-HSA-167284;R-HSA-167192;R-HSA-167288;R-HSA-167481;R-HSA-167196;R-HSA-167292;R-HSA-167197
R-HSA-1474244	Extracellular matrix organization	2	329	0.0232427	0.713628	0.713628	0.15	6	318	0.0262485	9606	Homo sapiens	ITGB2;ITGAL	2		R-HSA-216082;R-HSA-202704;R-HSA-202727;R-HSA-216069;R-HSA-199050;R-HSA-202718
R-HSA-195721	Signaling by WNT	2	330	0.0233133	0.7152	0.7152	0.15	6	156	0.0128766	9606	Homo sapiens	PSMB6;PSMB7	2		R-HSA-4608855;R-HSA-1504193;R-HSA-4641260;R-HSA-2130282;R-HSA-3640874;R-HSA-4641256
R-HSA-2142753	Arachidonic acid metabolism	1	166	0.0117273	0.71698	0.71698	0.14	1	77	0.00635576	9606	Homo sapiens	PTGR2	1		R-HSA-2161692
R-HSA-112316	Neuronal System	3	498	0.0351819	0.730496	0.730496	0.14	14	210	0.0173339	9606	Homo sapiens	STXBP1;ABAT	2		R-HSA-888589;R-HSA-380901;R-HSA-380869;R-HSA-380905;R-HSA-374922;R-HSA-372529;R-HSA-6794353;R-HSA-374899;R-HSA-210426;R-HSA-916855;R-HSA-380574;R-HSA-372505;R-HSA-210430;R-HSA-917744
R-HSA-162587	HIV Life Cycle	1	177	0.0125044	0.739827	0.739827	0.13	23	115	0.00949236	9606	Homo sapiens	NELFB	1		R-HSA-167459;R-HSA-167076;R-HSA-167077;R-HSA-167147;R-HSA-167150;R-HSA-167087;R-HSA-167148;R-HSA-167084;R-HSA-167181;R-HSA-167085;R-HSA-170706;R-HSA-167090;R-HSA-167282;R-HSA-170704;R-HSA-167478;R-HSA-167191;R-HSA-167284;R-HSA-167192;R-HSA-167288;R-HSA-167481;R-HSA-167196;R-HSA-167292;R-HSA-167197
R-HSA-5633007	Regulation of TP53 Activity	1	178	0.0125751	0.741811	0.741811	0.13	1	98	0.00808915	9606	Homo sapiens	MTOR	1		R-HSA-6795290
R-HSA-112315	Transmission across Chemical Synapses	2	352	0.0248675	0.748022	0.748022	0.13	13	157	0.0129591	9606	Homo sapiens	STXBP1;ABAT	2		R-HSA-888589;R-HSA-380901;R-HSA-380869;R-HSA-380905;R-HSA-374922;R-HSA-372529;R-HSA-374899;R-HSA-210426;R-HSA-916855;R-HSA-380574;R-HSA-372505;R-HSA-210430;R-HSA-917744
R-HSA-2262752	Cellular responses to stress	3	514	0.0363123	0.750014	0.750014	0.12	2	184	0.0151878	9606	Homo sapiens	PSMB6;PSMB7;MTOR	3		R-HSA-5082405;R-HSA-1234159
R-HSA-168898	Toll-like Receptor Cascades	1	184	0.0129989	0.753404	0.753404	0.12	1	182	0.0150227	9606	Homo sapiens	ITGB2	1		R-HSA-2559439
R-HSA-73894	DNA Repair	2	368	0.0259979	0.76983	0.76983	0.11	7	326	0.0269088	9606	Homo sapiens	GPS1;ISG15	2		R-HSA-5653766;R-HSA-5653780;R-HSA-5691006;R-HSA-5653786;R-HSA-5653754;R-HSA-5653770;R-HSA-6781833
R-HSA-983231	Factors involved in megakaryocyte development and platelet production	1	194	0.0137054	0.771592	0.771592	0.11	3	43	0.00354932	9606	Homo sapiens	KIF11	1		R-HSA-984606;R-HSA-983259;R-HSA-983266
R-HSA-68877	Mitotic Prometaphase	1	207	0.0146238	0.793262	0.793262	0.1	2	15	0.00123814	9606	Homo sapiens	TUBG2	1		R-HSA-380316;R-HSA-380508
R-HSA-1266738	Developmental Biology	7	1177	0.0831508	0.79548	0.79548	0.1	20	484	0.0399505	9606	Homo sapiens	PSMB6;ENAH;PSMB7;RPS25;KRT18;RPL36A	6		R-HSA-6806629;R-HSA-6805573;R-HSA-376140;R-HSA-6814734;R-HSA-6814764;R-HSA-6805546;R-HSA-428534;R-HSA-6806613;R-HSA-6810357;R-HSA-6811539;R-HSA-6814387;R-HSA-9014652;R-HSA-6806610;R-HSA-6809393;R-HSA-9011313;R-HSA-6809663;R-HSA-8942224;R-HSA-9014610;R-HSA-6814298;R-HSA-6810937
R-HSA-392499	Metabolism of proteins	15	2354	0.166302	0.801713	0.801713	0.1	67	890	0.0734627	9606	Homo sapiens	WARS;DDX58;GPS1;RPL36A;FN3KRP;NEDD8;MAT2B;PSMB6;RPS25;PSMB7;SPCS2;RCN1;B2M	13		R-HSA-8956040;R-HSA-8956045;R-HSA-1799326;R-HSA-156808;R-HSA-5696600;R-HSA-8956184;R-HSA-6788855;R-HSA-156823;R-HSA-5689539;R-HSA-156826;R-HSA-5665871;R-HSA-8956050;R-HSA-157849;R-HSA-8952618;R-HSA-8952620;R-HSA-422051;R-HSA-72619;R-HSA-72621;R-HSA-936381;R-HSA-8952638;R-HSA-8952639;R-HSA-1799330;R-HSA-1799329;R-HSA-1799335;R-HSA-5696872;R-HSA-1799332;R-HSA-8956106;R-HSA-936390;R-HSA-8956099;R-HS…
R-HSA-69278	Cell Cycle, Mitotic	3	570	0.0402685	0.809627	0.809627	0.09	16	322	0.0265786	9606	Homo sapiens	PSMB6;PSMB7;TUBG2	3		R-HSA-8852354;R-HSA-174058;R-HSA-174255;R-HSA-8854071;R-HSA-75825;R-HSA-187574;R-HSA-68948;R-HSA-174202;R-HSA-69016;R-HSA-174203;R-HSA-380316;R-HSA-380508;R-HSA-8854044;R-HSA-174105;R-HSA-188191;R-HSA-380283
R-HSA-5668914	Diseases of metabolism	1	220	0.0155422	0.812893	0.812893	0.09	1	114	0.00940982	9606	Homo sapiens	ALDOB	1		R-HSA-5656438
R-HSA-6805567	Keratinization	1	226	0.0159661	0.82132	0.82132	0.09	15	34	0.00280644	9606	Homo sapiens	KRT18	1		R-HSA-6806629;R-HSA-6805573;R-HSA-6814734;R-HSA-6814764;R-HSA-6805546;R-HSA-6806613;R-HSA-6810357;R-HSA-6811539;R-HSA-6814387;R-HSA-6806610;R-HSA-6809393;R-HSA-6809663;R-HSA-8942224;R-HSA-6814298;R-HSA-6810937
R-HSA-8953897	Cellular responses to external stimuli	3	621	0.0438714	0.853153	0.853153	0.07	7	269	0.0222039	9606	Homo sapiens	PSMB6;PSMB7;MTOR	3		R-HSA-5672017;R-HSA-5672817;R-HSA-5082405;R-HSA-5675790;R-HSA-5672010;R-HSA-1234159;R-HSA-5673768
R-HSA-156580	Phase II - Conjugation of compounds	1	258	0.0182268	0.8603	0.8603	0.07	1	72	0.00594305	9606	Homo sapiens	MAT2B	1		R-HSA-5603114
R-HSA-382551	Transport of small molecules	5	967	0.0683151	0.862626	0.862626	0.06	4	436	0.0359884	9606	Homo sapiens	PSMB6;PSMB7;PMPCB;PMPCA;NEDD8	5		R-HSA-5691108;R-HSA-8949649;R-HSA-5691176;R-HSA-8866553
R-HSA-597592	Post-translational protein modification	9	1594	0.11261	0.86348	0.86348	0.06	37	524	0.0432522	9606	Homo sapiens	PSMB6;PSMB7;RCN1;DDX58;GPS1;FN3KRP;NEDD8;MAT2B	8		R-HSA-8956040;R-HSA-8956106;R-HSA-8956045;R-HSA-936390;R-HSA-8956099;R-HSA-5696600;R-HSA-8951751;R-HSA-8956103;R-HSA-8956184;R-HSA-6788855;R-HSA-8951644;R-HSA-5689539;R-HSA-5665871;R-HSA-8956050;R-HSA-8951764;R-HSA-8951766;R-HSA-8951656;R-HSA-8952618;R-HSA-5696564;R-HSA-8956140;R-HSA-8952044;R-HSA-8952620;R-HSA-6788867;R-HSA-8951661;R-HSA-8951648;R-HSA-5665854;R-HSA-8952289;R-HSA-5690808;R-HSA-89…
R-HSA-109582	Hemostasis	4	826	0.0583539	0.87684	0.87684	0.06	7	327	0.0269913	9606	Homo sapiens	PLEK;ITGB2;KIF11;ITGAL	4		R-HSA-984606;R-HSA-482772;R-HSA-202704;R-HSA-202727;R-HSA-983259;R-HSA-202718;R-HSA-983266
R-HSA-3700989	Transcriptional Regulation by TP53	2	486	0.0343342	0.885683	0.885683	0.05	5	259	0.0213785	9606	Homo sapiens	NELFB;MTOR	2		R-HSA-6797606;R-HSA-380979;R-HSA-6797616;R-HSA-6797712;R-HSA-6795290
R-HSA-1640170	Cell Cycle	3	682	0.0481809	0.893719	0.893719	0.05	18	410	0.0338423	9606	Homo sapiens	PSMB6;PSMB7;TUBG2	3		R-HSA-69600;R-HSA-8852354;R-HSA-174058;R-HSA-174255;R-HSA-264458;R-HSA-8854071;R-HSA-75825;R-HSA-187574;R-HSA-68948;R-HSA-174202;R-HSA-69016;R-HSA-174203;R-HSA-380316;R-HSA-380508;R-HSA-8854044;R-HSA-174105;R-HSA-188191;R-HSA-380283
R-HSA-76002	Platelet activation, signaling and aggregation	1	299	0.0211233	0.898165	0.898165	0.05	1	114	0.00940982	9606	Homo sapiens	PLEK	1		R-HSA-482772
R-HSA-9006931	Signaling by Nuclear Receptors	1	317	0.0223949	0.911389	0.911389	0.04	2	131	0.010813	9606	Homo sapiens	RDH11	1		R-HSA-5362721;R-HSA-5419165
R-HSA-8957322	Metabolism of steroids	1	321	0.0226775	0.914088	0.914088	0.04	1	234	0.0193149	9606	Homo sapiens	OSBPL9	1		R-HSA-8867667
R-HSA-418594	G alpha (i) signalling events	2	567	0.0400565	0.931156	0.931156	0.03	3	161	0.0132893	9606	Homo sapiens	RDH11	1		R-HSA-975629;R-HSA-2464822;R-HSA-74872
R-HSA-196854	Metabolism of vitamins and cofactors	1	382	0.0269869	0.946458	0.946458	0.02	1	201	0.016591	9606	Homo sapiens	RDH11	1		R-HSA-975629
R-HSA-212436	Generic Transcription Pathway	7	1525	0.107736	0.950204	0.950204	0.02	15	811	0.0669418	9606	Homo sapiens	PSMB6;PSMB7;STAT1;NELFB;ITGAL;MTOR	6		R-HSA-6797606;R-HSA-9008015;R-HSA-9008110;R-HSA-8952408;R-HSA-8939801;R-HSA-9008475;R-HSA-9007999;R-HSA-380979;R-HSA-8949343;R-HSA-6797616;R-HSA-6797712;R-HSA-8957265;R-HSA-9009362;R-HSA-6795290;R-HSA-8949335
R-HSA-8978868	Fatty acid metabolism	1	429	0.0303073	0.962859	0.962859	0.02	1	217	0.0179117	9606	Homo sapiens	PTGR2	1		R-HSA-2161692
R-HSA-73857	RNA Polymerase II Transcription	7	1664	0.117556	0.974111	0.974111	0.01	29	872	0.0719769	9606	Homo sapiens	PSMB6;PSMB7;STAT1;NELFB;ITGAL;MTOR	6		R-HSA-113409;R-HSA-112385;R-HSA-6797606;R-HSA-113411;R-HSA-113413;R-HSA-113412;R-HSA-9008015;R-HSA-113414;R-HSA-112392;R-HSA-112395;R-HSA-112396;R-HSA-8952408;R-HSA-8939801;R-HSA-9008475;R-HSA-113429;R-HSA-8949343;R-HSA-6797616;R-HSA-8957265;R-HSA-9009362;R-HSA-8949335;R-HSA-9008110;R-HSA-112437;R-HSA-9007999;R-HSA-380979;R-HSA-6797712;R-HSA-112379;R-HSA-113402;R-HSA-112381;R-HSA-6795290
R-HSA-1430728	Metabolism	19	3635	0.2568	0.979911	0.979911	0.01	23	2213	0.182666	9606	Homo sapiens	OSBPL9;STXBP1;STARD10;RPL36A;GLRX;MAT2B;SAMHD1;PTGR2;ASS1;PSMB6;RPS25;PSMB7;HK3;RDH11;PRKD2;ALDOB;CDIPT;FBP1	18		R-HSA-353125;R-HSA-8866405;R-HSA-111746;R-HSA-975629;R-HSA-429698;R-HSA-8873923;R-HSA-71495;R-HSA-70342;R-HSA-71496;R-HSA-265166;R-HSA-8873834;R-HSA-8866601;R-HSA-70479;R-HSA-8873929;R-HSA-70577;R-HSA-8867667;R-HSA-70420;R-HSA-2408529;R-HSA-1482976;R-HSA-2161692;R-HSA-5333615;R-HSA-5603114;R-HSA-111742
R-HSA-211859	Biological oxidations	1	545	0.0385023	0.985022	0.985022	0.01	1	188	0.015518	9606	Homo sapiens	MAT2B	1		R-HSA-5603114
R-HSA-556833	Metabolism of lipids	5	1443	0.101943	0.987565	0.987565	0.01	7	942	0.0777548	9606	Homo sapiens	OSBPL9;STARD10;PRKD2;CDIPT;PTGR2	5		R-HSA-429698;R-HSA-8873923;R-HSA-8867667;R-HSA-1482976;R-HSA-2161692;R-HSA-8873834;R-HSA-8873929
R-HSA-74160	Gene expression (Transcription)	7	1822	0.128718	0.988333	0.988333	0.01	29	983	0.0811391	9606	Homo sapiens	PSMB6;PSMB7;STAT1;NELFB;ITGAL;MTOR	6		R-HSA-113409;R-HSA-112385;R-HSA-6797606;R-HSA-113411;R-HSA-113413;R-HSA-113412;R-HSA-9008015;R-HSA-113414;R-HSA-112392;R-HSA-112395;R-HSA-112396;R-HSA-8952408;R-HSA-8939801;R-HSA-9008475;R-HSA-113429;R-HSA-8949343;R-HSA-6797616;R-HSA-8957265;R-HSA-9009362;R-HSA-8949335;R-HSA-9008110;R-HSA-112437;R-HSA-9007999;R-HSA-380979;R-HSA-6797712;R-HSA-112379;R-HSA-113402;R-HSA-112381;R-HSA-6795290
R-HSA-162582	Signal Transduction	13	3202	0.22621	0.998042	0.998042	0	57	2214	0.182749	9606	Homo sapiens	ACTA2;PSMB6;ZBP1;PSMB7;STAT1;RDH11;NELFB;NEDD8;MTOR;EPN1	10		R-HSA-975629;R-HSA-9021325;R-HSA-5653968;R-HSA-4332236;R-HSA-4608855;R-HSA-2464822;R-HSA-5687105;R-HSA-9603598;R-HSA-3640874;R-HSA-5687112;R-HSA-9021334;R-HSA-183072;R-HSA-9604664;R-HSA-1470012;R-HSA-4641260;R-HSA-5672828;R-HSA-1470010;R-HSA-4641256;R-HSA-5672824;R-HSA-1470009;R-HSA-9604642;R-HSA-165680;R-HSA-9013567;R-HSA-380979;R-HSA-8850992;R-HSA-165692;R-HSA-5362448;R-HSA-8944457;R-HSA-182986…
R-HSA-388396	GPCR downstream signalling	2	1358	0.0959378	0.999746	0.999746	0	3	254	0.0209657	9606	Homo sapiens	RDH11	1		R-HSA-975629;R-HSA-2464822;R-HSA-74872
R-HSA-372790	Signaling by GPCR	2	1481	0.104627	0.999901	0.999901	0	3	431	0.0355757	9606	Homo sapiens	RDH11	1		R-HSA-975629;R-HSA-2464822;R-HSA-74872
